# Supplementary material for: The KNW rutile—a natural reference material for microbeam U–Pb age and trace element determination
Source: Royal Society of Chemistry journal article supplement (doi:10.1039/d4ja00190g), 2024-01-01
Supplement: d4ja00190g1.xlsx [file d4ja00190g1.xlsx]

## Sheet: Sheet1
		Table S1. LA-ICP-MS U-Pb age results
		Analysis NO.	Radiogenic isotope ratios						rho	U-Pb age (Ma)				f206
			Pb207/U235	2S	Pb206/U238	2S	Pb207/Pb206	2S		Pb206/U238	2S	Pb207/Pb206	2S
	session 1	KNW-1	2.0983	0.128191	0.196169	0.004801	0.0775092	0.0038351	0.624156	1154.71	28.26	1134.32	56.1255	0.209341
		KNW-2	1.98616	0.166768	0.192141	0.0074247	0.0748839	0.0047517	0.751895	1132.96	43.7799	1065.39	67.603	-0.103064
		KNW-3	2.00067	0.0726767	0.195631	0.0047411	0.0744339	0.0031046	0.116684	1151.8	27.914	1053.26	43.9313	-0.156613
		KNW-4	2.01482	0.133217	0.193957	0.0077152	0.0754042	0.0049513	0.296078	1142.78	45.457	1079.3	70.8708	-0.0411495
		KNW-5	2.04926	0.104788	0.195955	0.0053106	0.0758663	0.0037779	0.322009	1153.55	31.2627	1091.55	54.3561	0.0138395
		KNW-6	2.2121	0.0816339	0.200623	0.0061903	0.0801244	0.0034621	0.195172	1178.66	36.368	1200.05	51.8531	0.520545
		KNW-7	2.04063	0.121949	0.195693	0.0067891	0.0758034	0.0035659	0.604318	1152.14	39.9709	1089.88	51.2701	0.0063545
		KNW-8	2.03933	0.145638	0.19756	0.0050525	0.0747711	0.0041668	0.682511	1162.2	29.723	1062.35	59.2029	-0.116487
		KNW-9	2.0561	0.135241	0.194981	0.0063163	0.0767075	0.0053897	0.0984519	1148.3	37.1988	1113.6	78.2443	0.113941
		KNW-10	2.0965	0.0918074	0.196856	0.0050414	0.0772506	0.0037173	0.125553	1158.41	29.6662	1127.67	54.2627	0.178568
		KNW-11	1.94077	0.084796	0.185429	0.0071036	0.076129	0.0020232	0.807773	1096.57	42.0084	1098.46	29.1924	0.0451003
		KNW-12	1.96459	0.0890853	0.184643	0.0035055	0.0771883	0.0032314	0.346495	1092.29	20.7373	1126.06	47.1412	0.171155
		KNW-13	1.92211	0.0838866	0.184252	0.0040275	0.0758306	0.0030494	0.424421	1090.16	23.8292	1090.6	43.8572	0.00959124
		KNW-14	1.88095	0.0743499	0.183616	0.00512	0.0745657	0.002858	0.385107	1086.7	30.3018	1056.82	40.5066	-0.140929
		KNW-15	1.88655	0.0904817	0.185963	0.0051377	0.0738975	0.0050008	-0.500036	1099.47	30.3758	1038.67	70.2895	-0.220444
		KNW-16	1.81435	0.0792406	0.183097	0.004362	0.0723044	0.002441	-0.744871	1083.87	25.8213	994.522	33.5747	-0.41002
		KNW-16	1.85249	0.139187	0.186127	0.0089475	0.072254	0.0034011	0.805627	1100.36	52.8965	993.103	46.747	-0.416017
		KNW-17	1.83378	0.139442	0.183803	0.0069799	0.0723852	0.0034901	0.805627	1087.71	41.3061	996.791	48.0607	-0.400405
		KNW-18	1.90079	0.0748218	0.186845	0.0039767	0.0738323	0.0033701	-0.0805931	1104.26	23.5027	1036.89	47.3293	-0.228203
		KNW-19	1.89552	0.071285	0.185375	0.0056465	0.0736414	0.0020278	0.706895	1096.27	33.3924	1031.66	28.4082	-0.250919
		KNW-20	1.8337	0.086661	0.184461	0.0059019	0.0724233	0.0035021	0.302765	1091.3	34.9167	997.86	48.253	-0.395871
		KNW-21	1.85331	0.0642986	0.184176	0.0090289	0.073679	0.0031585	0.452104	1089.75	53.4229	1032.69	44.2699	-0.246445
		KNW-22	1.81734	0.115002	0.182965	0.0085447	0.0723961	0.0036599	0.542731	1083.15	50.5848	997.098	50.4067	-0.399108
		KNW-23	1.82971	0.107652	0.18462	0.005552	0.0721715	0.0041646	0.212432	1092.17	32.844	990.781	57.1721	-0.425834
		KNW-24	1.99069	0.104925	0.188419	0.0043862	0.0767513	0.0041211	0.260194	1112.81	25.9048	1114.74	59.8551	0.119153
		KNW-25	1.81895	0.120057	0.178408	0.0118822	0.0744312	0.0058527	0.240273	1058.27	70.4824	1053.18	82.8136	-0.156935
		KNW-26	1.83464	0.119745	0.184135	0.0067695	0.0724551	0.0038592	0.543143	1089.52	40.0553	998.751	53.1962	-0.392087
		KNW-27	1.97619	0.0964107	0.186436	0.0044306	0.0766913	0.0028907	0.622218	1102.04	26.1899	1113.17	41.958	0.112013
		KNW-28	1.98475	0.0680411	0.18838	0.0059209	0.077274	0.0018969	0.655899	1112.59	34.9696	1128.27	27.6966	0.181353
		KNW-29	1.82036	0.0798171	0.183861	0.0053401	0.0720729	0.0030804	0.350438	1088.03	31.6008	987.999	42.2272	-0.437568
		KNW-30	1.9345	0.116139	0.179112	0.0060583	0.0786794	0.0046015	0.260401	1062.12	35.9251	1164.08	68.0807	0.348593
		KNW-31	1.86318	0.146418	0.179987	0.0122671	0.0761893	0.0066106	0.196659	1066.9	72.7151	1100.05	95.4469	0.0522758
		KNW-32	3.16891	0.0636506	0.186796	0.0023954	0.123096	0.0030993	-0.112642	1103.99	14.1573	2001.58	50.3957	5.63413
		KNW-33	1.84439	0.0930233	0.182321	0.0106139	0.0741186	0.0039093	0.472295	1079.64	62.8517	1044.7	55.1021	-0.194133
		KNW-34	1.88323	0.0861972	0.178069	0.0057095	0.0775512	0.0027821	0.587704	1056.41	33.8722	1135.4	40.7313	0.214339
		KNW-35	1.84526	0.114724	0.180029	0.009476	0.0769018	0.0048949	0.482746	1067.13	56.1697	1118.65	71.2034	0.137062
		KNW-36	1.78107	0.0939928	0.178122	0.0084524	0.0729699	0.004015	0.411084	1056.71	50.1439	1013.12	55.7442	-0.330826
		KNW-37	1.82373	0.0987902	0.181338	0.0086717	0.0732349	0.0028125	0.676606	1074.28	51.373	1020.46	39.1903	-0.299292
		KNW-38	1.74799	0.0615399	0.176562	0.0048038	0.0709046	0.0022407	0.697026	1048.17	28.5181	954.664	30.1685	-0.576593
		KNW-39	2.5127	0.0597814	0.179953	0.0024262	0.100708	0.0022802	0.210854	1066.72	14.3821	1637.19	37.0684	2.96992
		KNW-40	1.80868	0.0774796	0.176307	0.0063414	0.0747366	0.003184	0.397364	1046.77	37.6498	1061.43	45.2192	-0.120593
		KNW-41	1.81654	0.146514	0.178123	0.0100928	0.0780763	0.0075222	0.570435	1056.71	59.8754	1148.82	110.682	0.276825
		KNW-42	1.79086	0.124245	0.175885	0.009128	0.0739677	0.003143	0.801563	1044.45	54.2046	1040.59	44.2162	-0.21209
		KNW-43	1.78665	0.0874344	0.182384	0.0091617	0.0716929	0.0040685	0.345419	1079.99	54.2509	977.235	55.4574	-0.482787
		KNW-44	1.78318	0.135813	0.174367	0.0056431	0.0733974	0.0040953	0.331112	1036.13	33.5328	1024.94	57.1885	-0.279955
		KNW-45	1.751	0.25992	0.177673	0.008842	0.0715447	0.0102291	0.107785	1054.25	52.4651	973.016	139.117	-0.500422
		KNW-46	1.76913	0.139392	0.178247	0.0082116	0.074818	0.0074151	0.58492	1057.39	48.7123	1063.62	105.414	-0.110906
		KNW-47	1.72262	0.0738927	0.176761	0.0085281	0.0711795	0.0026585	0.634242	1049.26	50.6226	962.573	35.952	-0.543881
		KNW-48	1.70734	0.0620351	0.171473	0.0079369	0.0726727	0.0028112	-0.106362	1020.22	47.2225	1004.84	38.8707	-0.366193
		KNW-49	1.76546	0.11334	0.178223	0.0094007	0.0732023	0.0041503	-0.0037214	1057.26	55.7674	1019.56	57.8052	-0.303171
		KNW-50	1.68714	0.189826	0.171607	0.0104391	0.0744087	0.0108987	0.523243	1020.96	62.1065	1052.57	154.171	-0.159612
		KNW-51	1.80267	0.0620606	0.180891	0.0045991	0.0723638	0.0016994	0.734212	1071.84	27.2512	996.19	23.3949	-0.402951
		KNW-52	1.84887	0.0710057	0.179559	0.0062749	0.0741526	0.0026218	0.623765	1064.57	37.2026	1045.62	36.9694	-0.190087
		KNW-53	1.83947	0.0747361	0.179221	0.0040276	0.0744916	0.0020513	0.856671	1062.72	23.8825	1054.82	29.0472	-0.149747
		KNW-54	1.81545	0.0611912	0.179966	0.0051994	0.0735519	0.002101	0.694763	1066.79	30.8205	1029.2	29.3986	-0.26157
		KNW-55	1.88018	0.10724	0.180297	0.0053414	0.0753486	0.0032065	0.464916	1068.6	31.6575	1077.81	45.867	-0.0477658
		KNW-56	1.84359	0.0797958	0.178501	0.0049233	0.0751057	0.0031189	0.461816	1058.78	29.2027	1071.33	44.4895	-0.0766704
		KNW-57	1.86113	0.0752506	0.180827	0.0051753	0.0748842	0.0036807	-0.0008392	1071.49	30.6665	1065.4	52.3669	-0.103029
		KNW-58	1.84988	0.0939531	0.184725	0.0038372	0.0736271	0.0026155	0.0748818	1092.74	22.6986	1031.26	36.6342	-0.252621
		KNW-59	1.87481	0.0847862	0.186927	0.0046494	0.0729239	0.003133	0.360472	1104.71	27.4774	1011.84	43.4716	-0.3363
		KNW-60	1.86399	0.0741403	0.184339	0.005789	0.073727	0.0027257	0.410094	1090.63	34.2506	1034	38.2269	-0.240733
		KNW-61	1.83982	0.0930796	0.183877	0.0071772	0.0744777	0.0037323	0.627922	1088.12	42.4723	1054.44	52.8411	-0.151401
		KNW-62	1.84748	0.0624566	0.182479	0.0068593	0.0745981	0.0025363	0.599363	1080.5	40.6158	1057.69	35.9609	-0.137074
		KNW-63	1.86974	0.134507	0.180505	0.0078489	0.0768166	0.0041658	0.643097	1069.74	46.5152	1116.43	60.5447	0.126923
		KNW-64	1.8265	0.0920252	0.183732	0.0054185	0.0726984	0.0027773	0.829484	1087.33	32.0666	1005.56	38.4157	-0.363134
		KNW-65	1.86587	0.0766214	0.18214	0.0039625	0.0737202	0.0023831	0.645189	1078.65	23.4667	1033.82	33.4193	-0.241542
		KNW-66	1.89166	0.0606183	0.183382	0.0035228	0.0748239	0.002058	0.469428	1085.42	20.8509	1063.78	29.258	-0.110204
		KNW-67	1.84085	0.0696061	0.182108	0.0049362	0.0734296	0.0021468	0.628105	1078.48	29.2331	1025.83	29.9912	-0.276123
		KNW-68	1.94101	0.0887371	0.18647	0.0086383	0.0754431	0.0025949	0.700564	1102.23	51.0612	1080.33	37.1581	-0.0365205
		KNW-69	2.61772	0.0963959	0.182343	0.0036528	0.103999	0.003561	0.440694	1079.76	21.6302	1696.69	58.0954	3.36164
		KNW-70	1.93625	0.0894833	0.184003	0.0057688	0.0760899	0.0024828	0.695797	1088.81	34.1359	1097.44	35.8088	0.0404474
		KNW-71	1.63274	0.165764	0.166814	0.0069022	0.0698788	0.0064132	0.306285	994.532	41.1504	924.795	84.874	-0.698661
		KNW-72	1.95324	0.214571	0.172725	0.0073419	0.0818423	0.0066339	0.758436	1027.11	43.6584	1241.75	100.653	0.724972
		KNW-73	1.89338	0.0450846	0.184237	0.0059228	0.0752246	0.0026015	0.392912	1090.08	35.0438	1074.51	37.1601	-0.0625216
		KNW-74	1.78874	0.203811	0.176978	0.0110383	0.0736542	0.0076977	0.448221	1050.44	65.517	1032.01	107.857	-0.249396
		KNW-75	1.78483	0.253478	0.175888	0.0086219	0.0742362	0.009011	0.586551	1044.47	51.1993	1047.9	127.197	-0.180139
		KNW-76	1.80639	0.184591	0.179352	0.0094812	0.0705859	0.005014	0.0516923	1063.43	56.2168	945.446	67.1585	-0.614518
		KNW-77	1.84061	0.137487	0.179733	0.012644	0.0751474	0.0052997	0.47425	1065.52	74.9576	1072.45	75.6331	-0.0717082
		KNW-78	1.78934	0.0969167	0.179601	0.0111486	0.072777	0.004307	0.48911	1064.79	66.0962	1007.75	59.6399	-0.353781
		KNW-79	1.78876	0.18295	0.177564	0.0110571	0.0734937	0.0066012	0.38286	1053.65	65.6118	1027.6	92.2993	-0.268495
		KNW-80	1.73043	0.13607	0.172899	0.0091118	0.0734049	0.0061802	0.0573941	1028.07	54.1793	1025.15	86.3104	-0.279062
		KNW-81	1.74748	0.230915	0.17563	0.0102867	0.0685311	0.0049515	0.372322	1043.06	61.0924	884.66	63.9185	-0.859035
		KNW-82	1.65108	0.0868354	0.170178	0.0124293	0.0707307	0.0041184	0.597674	1013.09	73.9931	949.641	55.2944	-0.597287
		KNW-83	1.72945	0.0716466	0.173214	0.0081287	0.0734911	0.0033911	0.0278009	1029.8	48.327	1027.53	47.4131	-0.268805
		KNW-84	1.78934	0.0979711	0.181623	0.0108217	0.0722051	0.0043325	0.427847	1075.83	64.1017	991.728	59.5066	-0.421836
		KNW-85	1.79506	0.20116	0.176677	0.0075953	0.0736854	0.0068892	0.502534	1048.8	45.0874	1032.86	96.5677	-0.245683
		KNW-86	1.73607	0.117976	0.176667	0.0065943	0.0716575	0.0062289	-0.379122	1048.74	39.1456	976.229	84.859	-0.486999
		KNW-87	1.7601	0.191501	0.176679	0.0096981	0.0723559	0.0068584	0.547936	1048.81	57.5702	995.969	94.4051	-0.403891
		KNW-88	1.72134	0.176519	0.171858	0.010031	0.072776	0.0065866	0.494189	1022.34	59.6718	1007.72	91.2039	-0.3539
		KNW-89	1.83188	0.185414	0.175031	0.0121508	0.0763798	0.0060173	0.54416	1039.77	72.182	1105.04	87.0563	0.074945
		KNW-90	1.75853	0.14688	0.171496	0.0070543	0.0771156	0.0064856	0.636918	1020.35	41.9706	1124.18	94.5468	0.162504
		KNW-91	1.88262	0.0583964	0.185462	0.0041677	0.0740364	0.0020176	0.343294	1096.74	24.6461	1042.46	28.4088	-0.203915
		KNW-92	1.93459	0.0825282	0.185947	0.0051811	0.0754364	0.0035782	0.103047	1099.38	30.6327	1080.15	51.2346	-0.0373178
		KNW-93	4.71647	0.156176	0.208011	0.0034082	0.164068	0.0051579	0.327263	1218.21	19.9601	2498.02	78.5323	10.5097
		KNW-94	1.85101	0.0525299	0.185141	0.0061803	0.0727696	0.0022708	0.41998	1095	36.5526	1007.54	31.4412	-0.354662
		KNW-95	1.8607	0.0875403	0.185575	0.0062356	0.0730882	0.0039215	0.0883568	1097.36	36.8727	1016.4	54.5348	-0.316749
		KNW-96	1.83991	0.0822394	0.186477	0.0074546	0.0731442	0.0035978	0.366227	1102.26	44.0642	1017.95	50.071	-0.310085
		KNW-97	2.02647	0.169703	0.189115	0.0073044	0.0776676	0.0053085	0.600636	1116.58	43.1267	1138.38	77.8074	0.228191
		KNW-98	1.80792	0.0917432	0.181546	0.0065794	0.0723215	0.0030488	0.585164	1075.41	38.9743	995.002	41.9459	-0.407985
		KNW-99	1.95605	0.105255	0.187189	0.0087911	0.076094	0.0033924	0.60012	1106.13	51.948	1097.55	48.9304	0.0409353
		KNW-100	1.89309	0.0767559	0.185475	0.0074891	0.0743388	0.0026428	0.54094	1096.81	44.2872	1050.68	37.3518	-0.16793
	session 2	KNW-101	1.8314	0.0915639	0.170945	0.0061239	0.0757805	0.0039748	0.319792	1017.31	36.4443	1089.28	57.1337	0.00362944
		KNW-102	1.86203	0.128194	0.180622	0.0035745	0.0751358	0.0051281	0.194371	1070.37	21.1825	1072.14	73.1746	-0.0730886
		KNW-103	1.86572	0.185532	0.180677	0.0137118	0.0717523	0.0051757	0.735299	1070.67	81.2547	978.924	70.613	-0.475718
		KNW-104	1.88921	0.108151	0.182226	0.0064438	0.0731613	0.0038098	0.478963	1079.12	38.1597	1018.42	53.0337	-0.30805
		KNW-105	2.08888	0.0885588	0.177994	0.0039707	0.085162	0.0033218	0.359263	1056.01	23.5576	1319.23	51.4575	1.12001
		KNW-106	1.87981	0.0860607	0.181858	0.0099573	0.0730704	0.0044358	0.263987	1077.12	58.9753	1015.91	61.672	-0.318867
		KNW-107	1.91677	0.114346	0.186224	0.0058825	0.0722478	0.0039363	-0.323567	1100.89	34.7751	992.929	54.0987	-0.416755
		KNW-108	1.87293	0.128578	0.178798	0.0022758	0.0762814	0.0046369	0.669783	1060.4	13.4973	1102.46	67.0155	0.0632356
		KNW-109	1.86696	0.109497	0.179177	0.0031569	0.0759376	0.005049	-0.329327	1062.48	18.7196	1093.43	72.7008	0.022324
		KNW-110	1.80094	0.106947	0.175637	0.0044888	0.0746763	0.0041241	0.320948	1043.1	26.6587	1059.8	58.529	-0.127768
		KNW-111	1.87787	0.103498	0.181965	0.0072882	0.073537	0.0040673	0.231458	1077.7	43.1651	1028.79	56.9023	-0.263343
		KNW-112	1.89894	0.0860706	0.183792	0.008694	0.0731384	0.0050137	-0.0603289	1087.66	51.45	1017.79	69.7698	-0.310775
		KNW-113	1.8042	0.0718757	0.175021	0.0051643	0.07338	0.002779	0.447597	1039.72	30.6787	1024.47	38.7985	-0.282025
		KNW-114	1.85407	0.0745314	0.177683	0.003668	0.0747144	0.0029999	0.58711	1054.3	21.7645	1060.83	42.5944	-0.123234
		KNW-115	1.89109	0.101023	0.179767	0.0076498	0.0748341	0.0039151	0.427325	1065.7	45.3496	1064.05	55.6675	-0.10899
		KNW-116	1.88172	0.0909893	0.182718	0.0090122	0.0726089	0.0032155	0.627906	1081.8	53.3577	1003.06	44.421	-0.373785
		KNW-117	1.89833	0.103621	0.183083	0.0091768	0.0732839	0.0027872	0.732976	1083.8	54.3241	1021.81	38.862	-0.293461
		KNW-118	3.37721	0.274335	0.203215	0.0072343	0.117379	0.0080206	0.669818	1192.57	42.4548	1916.69	130.97	4.95376
		KNW-119	1.91003	0.0694969	0.185392	0.0050263	0.0749539	0.0028002	0.321356	1096.36	29.7241	1067.27	39.8721	-0.0947343
		KNW-120	1.91218	0.0936091	0.185063	0.0035402	0.075259	0.0036322	0.21544	1094.58	20.9388	1075.43	51.9034	-0.058428
		KNW-121	1.91821	0.109474	0.187046	0.0046726	0.0744512	0.0043662	0.174321	1105.35	27.6126	1053.72	61.7956	-0.154555
		KNW-122	1.94125	0.0765301	0.186651	0.0039424	0.0758493	0.0028956	0.322105	1103.21	23.3015	1091.1	41.6532	0.0118165
		KNW-123	1.91208	0.065551	0.185388	0.0044965	0.074406	0.0027089	0.281496	1096.34	26.5916	1052.5	38.3185	-0.159933
		KNW-124	1.9021	0.0989242	0.183728	0.0023853	0.0752144	0.0035042	0.282612	1087.31	14.1162	1074.24	50.0474	-0.0637353
		KNW-125	1.93508	0.100439	0.188734	0.0041217	0.0737888	0.0035673	0.277525	1114.51	24.3393	1035.7	50.0704	-0.233379
		KNW-126	1.92159	0.114998	0.186388	0.0075847	0.07525	0.0043096	0.352933	1101.78	44.8348	1075.19	61.5767	-0.059499
		KNW-127	1.91681	0.135182	0.185923	0.0047623	0.0749159	0.0055001	0.092338	1099.25	28.1564	1066.25	78.2807	-0.0992563
		KNW-128	1.90209	0.0593579	0.184551	0.0035225	0.0745335	0.0024897	0.20771	1091.79	20.8389	1055.95	35.2724	-0.144761
		KNW-129	1.94934	0.0949436	0.186616	0.0063723	0.0762341	0.003771	0.34056	1103.02	37.6644	1101.23	54.4737	0.0576069
		KNW-130	1.89137	0.249278	0.185481	0.0069164	0.0740096	0.0080137	0.698641	1096.85	40.9003	1041.73	112.797	-0.207104
		KNW-131	1.92094	0.115397	0.186135	0.0062248	0.0747792	0.004442	0.311148	1100.4	36.8	1062.57	63.1187	-0.115523
		KNW-132	1.91258	0.139057	0.186807	0.0048356	0.0737263	0.003976	0.308319	1104.05	28.5792	1033.98	55.762	-0.240816
		KNW-133	1.90595	0.0903027	0.1852	0.0050093	0.0752223	0.0038359	0.0849157	1095.32	29.6263	1074.45	54.7912	-0.0627953
		KNW-134	1.93785	0.198482	0.186198	0.0101554	0.0745888	0.0038281	0.953613	1100.74	60.0354	1057.44	54.2706	-0.138181
		KNW-135	1.92946	0.124443	0.190817	0.0057077	0.0707223	0.0030878	0.682224	1125.8	33.675	949.396	41.4517	-0.598286
		KNW-136	1.9127	0.0824132	0.185844	0.0052465	0.0729487	0.0035735	0.0971385	1098.82	31.0205	1012.53	49.6003	-0.333349
		KNW-137	1.90796	0.075871	0.183949	0.0106693	0.0726776	0.0039615	0.385033	1088.51	63.1352	1004.98	54.7785	-0.36561
		KNW-138	1.89399	0.13941	0.18385	0.0070379	0.0729752	0.0068032	-0.109521	1087.97	41.6483	1013.26	94.4633	-0.330196
		KNW-139	1.95114	0.185002	0.184705	0.0073063	0.0763726	0.0054531	0.728741	1092.63	43.2209	1104.85	78.8873	0.0740882
		KNW-140	1.89129	0.0875475	0.183575	0.0055605	0.0750657	0.0049276	-0.285864	1086.48	32.9092	1070.26	70.2566	-0.0814304
		KNW-141	1.89666	0.070586	0.184609	0.0055659	0.0731005	0.0025183	0.480956	1092.11	32.9267	1016.74	35.0259	-0.315285
		KNW-142	1.87314	0.0721364	0.179374	0.0045454	0.0736495	0.0023412	0.507182	1063.55	26.9509	1031.88	32.8012	-0.249955
		KNW-143	1.88361	0.0871395	0.180999	0.0086366	0.073191	0.0044387	0.0596114	1072.43	51.1722	1019.24	61.8128	-0.304516
		KNW-144	1.84739	0.0973093	0.176388	0.0041804	0.0741498	0.0041485	0.171047	1047.21	24.8188	1045.55	58.4953	-0.190421
		KNW-145	1.87921	0.0984441	0.178727	0.0060682	0.0771123	0.004945	-0.0199996	1060.01	35.9901	1124.1	72.0854	0.162111
		KNW-146	1.87417	0.114116	0.182201	0.0068986	0.0749671	0.0042224	0.456798	1078.99	40.8531	1067.62	60.132	-0.0931636
		KNW-147	1.87268	0.109761	0.178363	0.0041095	0.076328	0.004051	0.297275	1058.03	24.3767	1103.69	58.5759	0.0687809
		KNW-148	1.90339	0.0740878	0.182329	0.0066655	0.0748263	0.0028569	0.58304	1079.69	39.4706	1063.84	40.6174	-0.109918
		KNW-149	1.92871	0.160107	0.186616	0.0045794	0.0737916	0.0066361	-0.229773	1103.02	27.0673	1035.77	93.1474	-0.233046
		KNW-150	1.93189	0.0862217	0.185938	0.0045324	0.0753907	0.0028044	0.150612	1099.33	26.7969	1078.94	40.1348	-0.042756
		KNW-151	1.9356	0.0993631	0.188749	0.0052218	0.0747979	0.0044006	0.0398099	1114.59	30.8355	1063.08	62.5442	-0.113298
		KNW-152	1.91981	0.0732191	0.184785	0.003729	0.0759604	0.0032287	-0.0049354	1093.06	22.0583	1094.03	46.5018	0.0250372
		KNW-153	1.90883	0.12102	0.185513	0.0053441	0.0749869	0.0041232	0.519937	1097.02	31.6019	1068.15	58.733	-0.0908074
		KNW-154	1.91526	0.0770871	0.187133	0.0042293	0.0748347	0.0024679	0.588147	1105.82	24.9919	1064.06	35.0908	-0.108919
		KNW-155	1.92538	0.0640129	0.188514	0.0031139	0.0741144	0.0019868	0.552098	1113.32	18.3902	1044.59	28.0026	-0.194633
		KNW-156	1.97069	0.0661655	0.193214	0.005889	0.0738411	0.0021021	0.620328	1138.76	34.7086	1037.13	29.5245	-0.227155
		KNW-157	1.93714	0.0740677	0.187556	0.005118	0.0755523	0.0041649	-0.355368	1108.12	30.2385	1083.23	59.7138	-0.0235259
		KNW-158	1.90896	0.152736	0.184895	0.0060945	0.0747281	0.0040879	0.841839	1093.66	36.0493	1061.2	58.0509	-0.121604
		KNW-159	1.918	0.105147	0.185025	0.0050141	0.0756556	0.0035306	0.544072	1094.37	29.6571	1085.97	50.6789	-0.0112334
		KNW-160	1.95421	0.139208	0.184863	0.0027378	0.0771847	0.0060785	-0.459626	1093.49	16.1945	1125.96	88.6727	0.170726
		KNW-161	1.85889	0.0808864	0.178586	0.0042799	0.0759553	0.0026344	0.566526	1059.24	25.3852	1093.89	37.9403	0.0244303
		KNW-162	1.91669	0.0750327	0.186058	0.0066921	0.0731859	0.0046601	-0.559032	1099.99	39.5641	1019.1	64.8916	-0.305123
		KNW-163	1.88339	0.123962	0.183886	0.0045666	0.0708542	0.0054574	0.159185	1088.17	27.0235	953.211	73.4193	-0.582591
		KNW-164	1.91341	0.0878213	0.185293	0.0046034	0.0746691	0.0025332	0.654032	1095.83	27.2243	1059.61	35.9478	-0.128625
		KNW-165	1.91813	0.10835	0.184687	0.0073031	0.0733392	0.0023022	0.411008	1092.53	43.2021	1023.34	32.1233	-0.28688
		KNW-166	1.9023	0.130059	0.184569	0.0041602	0.0746757	0.004712	0.342787	1091.89	24.6112	1059.79	66.8714	-0.12784
		KNW-167	1.89861	0.0966043	0.184586	0.0042782	0.0772476	0.0047822	0.737872	1091.98	25.3091	1127.59	69.8058	0.178211
		KNW-168	1.89187	0.0833316	0.182316	0.0049625	0.0755153	0.0039843	-0.0386145	1079.61	29.3864	1082.25	57.1015	-0.0279288
		KNW-169	1.89914	0.0539303	0.183622	0.003122	0.0746554	0.0021299	0.241754	1086.73	18.4768	1059.24	30.2195	-0.130255
		KNW-170	1.88247	0.0586468	0.183247	0.0026684	0.0745015	0.002086	0.363396	1084.69	15.7949	1055.09	29.5412	-0.148569
		KNW-171	1.97466	0.0515604	0.178775	0.0030061	0.0794666	0.0024959	0.150243	1060.28	17.8288	1183.78	37.1801	0.442268
		KNW-172	1.8928	0.0610218	0.183176	0.0030826	0.0743858	0.002236	0.411448	1084.3	18.2471	1051.95	31.621	-0.162337
		KNW-173	1.90569	0.0833484	0.182973	0.0049017	0.0752861	0.0032764	0.357025	1083.2	29.0177	1076.15	46.8336	-0.0552032
		KNW-174	1.91976	0.107508	0.185711	0.0039534	0.0751221	0.0032004	0.472941	1098.1	23.3764	1071.77	45.6599	-0.0747189
		KNW-175	1.89634	0.0891691	0.183305	0.0042599	0.0758016	0.0041569	-0.0450172	1085.01	25.2147	1089.84	59.7658	0.0061403
		KNW-176	1.91959	0.107336	0.187043	0.0068084	0.0724625	0.0034466	0.458007	1105.34	40.2346	998.959	47.5146	-0.391206
		KNW-177	1.90787	0.0663253	0.18417	0.0029635	0.0757346	0.0023606	0.225844	1089.72	17.535	1088.06	33.9141	-0.00183257
		KNW-178	1.91089	0.0527074	0.185567	0.0035383	0.0750221	0.0025782	-0.318322	1097.32	20.9232	1069.09	36.7403	-0.0866187
		KNW-179	1.90305	0.0938304	0.18306	0.0047881	0.0737877	0.0036853	0.243373	1083.67	28.3446	1035.67	51.7257	-0.23351
		KNW-180	2.18396	0.0850213	0.182808	0.0029335	0.0873321	0.0033099	0.283811	1082.3	17.3676	1367.83	51.8406	1.37825
		KNW-181	1.92816	0.0712077	0.186768	0.0039668	0.074306	0.002137	0.603848	1103.84	23.4446	1049.79	30.1919	-0.171833
		KNW-182	1.90524	0.0689067	0.184833	0.005609	0.0734492	0.0019172	0.606985	1093.32	33.1782	1026.37	26.791	-0.273791
		KNW-183	1.91395	0.068975	0.185414	0.0047075	0.0756238	0.0031462	0.12409	1096.48	27.839	1085.13	45.145	-0.0150176
		KNW-184	1.91735	0.096205	0.185631	0.0036441	0.0752669	0.0041179	-0.114414	1097.67	21.5481	1075.64	58.8491	-0.057488
		KNW-185	1.90317	0.0634915	0.184601	0.0041175	0.0751389	0.0033495	-0.115935	1092.06	24.3583	1072.22	47.7964	-0.0727197
		KNW-186	1.96295	0.102203	0.192309	0.0035453	0.0743752	0.0028422	0.786224	1133.87	20.9037	1051.67	40.188	-0.163599
		KNW-187	1.90941	0.102644	0.185472	0.0037476	0.0752455	0.0037983	0.33606	1096.8	22.1618	1075.07	54.268	-0.0600345
		KNW-188	1.97865	0.104463	0.193747	0.0069327	0.0730235	0.003586	0.44835	1141.64	40.8504	1014.61	49.8244	-0.324448
		KNW-189	1.98456	0.105772	0.195034	0.0058669	0.0736507	0.0034436	0.493627	1148.59	34.5513	1031.91	48.2483	-0.249813
		KNW-190	1.91999	0.108344	0.186402	0.0045896	0.0748749	0.0041637	0.142634	1101.85	27.1302	1065.15	59.2315	-0.104135
		KNW-191	1.91367	0.0962616	0.185392	0.003591	0.0741978	0.0034893	0.27828	1096.37	21.2364	1046.85	49.2297	-0.184709
		KNW-192	1.89998	0.100693	0.183296	0.0025448	0.075773	0.0037824	0.345701	1084.96	15.0631	1089.08	54.3647	0.00273695
		KNW-193	1.91273	0.108954	0.183487	0.0042526	0.0752588	0.004762	-0.116649	1086	25.1694	1075.42	68.0478	-0.0584518
		KNW-194	1.90009	0.0883883	0.184199	0.0039472	0.0753648	0.00346	0.271478	1089.87	23.3547	1078.25	49.502	-0.045838
		KNW-195	1.89703	0.0884255	0.182826	0.0037564	0.0752399	0.0039708	-0.0620096	1082.4	22.2391	1074.92	56.7288	-0.0607009
		KNW-196	1.90958	0.102627	0.184327	0.0043091	0.0743383	0.0042537	-0.0090901	1090.57	25.4946	1050.67	60.1196	-0.16799
		KNW-197	1.91661	0.0933563	0.185539	0.0066964	0.0740231	0.0047179	-0.118573	1097.16	39.5983	1042.1	66.418	-0.205498
		KNW-198	1.91715	0.109175	0.187319	0.0066472	0.0750862	0.0046824	0.157646	1106.83	39.277	1070.81	66.7766	-0.0789909
		KNW-199	1.90678	0.0750199	0.186415	0.0050031	0.0745827	0.0031877	0.138538	1101.93	29.5743	1057.28	45.1889	-0.138906
		KNW-200	2.01648	0.101734	0.193968	0.0024891	0.0755456	0.0038343	0.101359	1142.84	14.6656	1083.05	54.9707	-0.0243232
	session 3	KNW-1	2.1	0.15	0.1838	0.0079	0.0846	0.0068	0.601741	1085	43	1306.39	105.005	1.05313
		KNW-2	1.95	0.13	0.1847	0.0058	0.0778	0.0059	0.471034	1091	32	1141.77	86.5867	0.243946
		KNW-3	2.06	0.15	0.1869	0.0081	0.0798	0.0056	0.595185	1108	42	1192.05	83.6526	0.481942
		KNW-4	1.82	0.14	0.1855	0.0067	0.0705	0.0052	0.469542	1095	36	942.951	69.551	-0.62474
		KNW-5	1.89	0.14	0.1849	0.0061	0.075	0.0061	0.445376	1091	33	1068.5	86.9048	-0.0892485
		KNW-6	1.89	0.19	0.1887	0.0098	0.0741	0.0084	0.516609	1111	53	1044.19	118.37	-0.196347
		KNW-7	1.89	0.18	0.1892	0.0093	0.0735	0.0079	0.516121	1115	50	1027.77	110.468	-0.267746
		KNW-8	1.92	0.14	0.1862	0.006	0.0762	0.0056	0.441921	1099	33	1100.33	80.8641	0.0535491
		KNW-9	2.89	0.21	0.1945	0.0065	0.1104	0.0079	0.459909	1143	35	1806	129.234	4.12328
		KNW-10	3.38	0.34	0.2024	0.0069	0.125	0.012	0.338904	1186	37	2028.8	194.764	5.86065
		KNW-11	8.12	0.85	0.24	0.015	0.246	0.02	0.597059	1380	79	3159.2	256.846	20.2594
		KNW-12	1.94	0.14	0.1833	0.0071	0.078	0.006	0.536747	1082	39	1146.87	88.221	0.267746
		KNW-13	1.96	0.16	0.1837	0.0067	0.0776	0.0063	0.446788	1085	37	1136.65	92.2797	0.220146
		KNW-14	1.85	0.15	0.1793	0.0088	0.0768	0.0068	0.605317	1059	47	1116	98.8126	0.124948
		KNW-15	1.85	0.17	0.1863	0.0089	0.0728	0.0066	0.519876	1098	49	1008.39	91.42	-0.351044
		KNW-16	1.95	0.23	0.184	0.01	0.0754	0.0093	0.460775	1086	57	1079.18	133.109	-0.0416493
		KNW-17	1.93	0.15	0.1813	0.0067	0.0769	0.0064	0.475492	1071	37	1118.6	93.0952	0.136848
		KNW-18	1.9	0.18	0.1914	0.0078	0.0704	0.0066	0.430164	1126	42	940.042	88.129	-0.636639
		KNW-19	2	0.17	0.1855	0.0087	0.082	0.0083	0.551768	1094	47	1245.52	126.071	0.743738
		KNW-20	2.14	0.2	0.1924	0.0087	0.081	0.0074	0.483836	1131	47	1221.44	111.589	0.62474
		KNW-21	2.01	0.21	0.1846	0.0076	0.0816	0.0094	0.394057	1090	41	1235.93	142.375	0.696139
		KNW-22	1.85	0.17	0.1769	0.0096	0.077	0.0073	0.590563	1046	53	1121.19	106.295	0.148748
		KNW-23	2.91	0.21	0.1945	0.0078	0.1084	0.008	0.555711	1150	45	1772.7	130.827	3.88529
		KNW-24	2.05	0.2	0.1818	0.0071	0.0818	0.008	0.400303	1075	39	1240.73	121.343	0.719938
		KNW-25	1.9	0.14	0.188	0.008	0.0754	0.006	0.577508	1109	43	1079.18	85.8767	-0.0416493
		KNW-26	1.99	0.14	0.1861	0.0067	0.0795	0.006	0.511745	1098	36	1184.61	89.4047	0.446243
		KNW-27	1.83	0.13	0.1866	0.0061	0.0718	0.0053	0.460178	1100	33	980.277	72.3603	-0.470042
		KNW-28	1.93	0.17	0.1843	0.0077	0.0766	0.0072	0.474323	1088	42	1110.8	104.409	0.101148
		KNW-29	1.89	0.16	0.1813	0.0091	0.0764	0.0068	0.592905	1070	49	1105.57	98.4016	0.0773487
		KNW-30	1.86	0.16	0.1815	0.0066	0.0769	0.0068	0.422727	1080	37	1118.6	98.9137	0.136848
		KNW-31	1.87	0.13	0.1787	0.0071	0.0793	0.0065	0.571521	1057	39	1179.63	96.6912	0.422443
		KNW-32	1.97	0.13	0.181	0.0059	0.0799	0.0054	0.493965	1070	32	1194.52	80.7311	0.493842
		KNW-33	1.95	0.16	0.1839	0.0075	0.0785	0.0061	0.497043	1086	41	1159.56	90.1056	0.327245
		KNW-34	1.84	0.14	0.1759	0.0061	0.0775	0.0065	0.455778	1043	33	1134.09	95.1168	0.208247
		KNW-35	1.95	0.17	0.1848	0.0066	0.0771	0.0072	0.409664	1091	36	1123.78	104.944	0.160647
		KNW-36	1.91	0.13	0.1842	0.0081	0.0793	0.0061	0.646079	1085	44	1179.63	90.741	0.422443
		KNW-37	2.01	0.26	0.186	0.013	0.079	0.01	0.540323	1097	73	1172.13	148.372	0.386744
		KNW-38	2.01	0.2	0.1832	0.0067	0.0808	0.0088	0.367549	1083	37	1216.58	132.499	0.60094
		KNW-39	2	0.13	0.18	0.0061	0.082	0.0058	0.521368	1065	33	1245.52	88.0975	0.743738
		KNW-40	1.9	0.18	0.1783	0.0084	0.0779	0.0078	0.497289	1055	45	1144.32	114.579	0.255846
														-0.859035
														20.2594
