# Supplementary material for: The KNW rutile—a natural reference material for microbeam U–Pb age and trace element determination
Source: Royal Society of Chemistry journal article supplement (doi:10.1039/d4ja00190g), 2024-01-01
Supplement: d4ja00190g2.xlsx [file d4ja00190g2.xlsx]

## Sheet: Sheet1
							Table S2. LA-ICP-MS and EPMA trace element results
			V	2s		Cr	2s		Nb	2s		Sc	2s		Zr	2s		Hf	2s		Ta	2s		U	2s		Pb	2s		W	2s		Fe	2s
LA-(Q,SF)-ICP-MS	IGG1	KNW-15	6070	220	KNW-17	1698	43	KNW-24	1117	41	KNW-6	31.2	1.7	KNW-24	833	19	KNW-24	36.5	1.3	KNW-24	158.4	4	KNW-1	20.63	0.65	KNW-27	3.90974	0.25267	KNW-30	11.41	0.74	-	-	-
		KNW-6	6070	280	KNW-29	1699	59	KNW-23	1154	23	KNW-7	33.3	1.6	KNW-22	856	13	KNW-23	37.9	1.2	KNW-50	159.9	3.2	KNW-26	21.47	0.98	KNW-1	3.92743	0.24223	KNW-27	11.42	0.65	-	-	-
		KNW-14	6105	73	KNW-13	1701	47	KNW-21	1164	16	KNW-10	38.9	1.3	KNW-21	859	13	KNW-25	38.5	1.2	KNW-48	160.1	4.5	KNW-28	21.85	0.7	KNW-28	4.09712	0.27677	KNW-29	11.64	0.74	-	-	-
		KNW-20	6150	150	KNW-25	1704	38	KNW-25	1166	24	KNW-8	43.7	1.5	KNW-23	860	12	KNW-22	38.56	0.73	KNW-17	162.1	3.4	KNW-18	22.15	0.49	KNW-26	4.11843	0.26071	KNW-28	11.8	0.7	-	-	-
		KNW-23	6160	170	KNW-5	1706	59	KNW-50	1168	27	KNW-9	44.1	2.1	KNW-25	878	18	KNW-21	38.6	1	KNW-19	163.1	2.7	KNW-27	22.2	1.6	KNW-30	4.16502	0.22475	KNW-18	12.09	0.58	-	-	-
		KNW-23	6170	210	KNW-50	1708	46	KNW-48	1173	30	KNW-15	66.3	1.7	KNW-48	920	25	KNW-48	39.3	1.6	KNW-49	163.1	2.8	KNW-30	22.27	0.46	KNW-17	4.32589	0.29625	KNW-17	12.63	0.76	-	-	-
		KNW-19	6180	130	KNW-23	1709	31	KNW-22	1182	24	KNW-23	72.1	2.7	KNW-50	959	23	KNW-46	41.5	1.5	KNW-18	163.4	3.4	KNW-43	22.92	0.66	KNW-19	4.36826	0.23118	KNW-26	12.81	0.68	-	-	-
		KNW-15	6180	110	KNW-24	1709	55	KNW-29	1187	40	KNW-27	73	2.5	KNW-49	965	21	KNW-47	42.5	1.2	KNW-20	163.4	2.9	KNW-41	23.01	0.68	KNW-29	4.38654	0.28842	KNW-16	13.26	0.7	-	-	-
		KNW-29	6190	150	KNW-40	1710	53	KNW-49	1196	30	KNW-30	73.4	3	KNW-46	978	17	KNW-50	42.5	1.6	KNW-46	163.8	3.5	KNW-42	23.13	0.94	KNW-18	4.41124	0.3093	KNW-19	14.17	0.85	-	-	-
		KNW-6	6190	140	KNW-28	1711	34	KNW-2	1206	28	KNW-5	73.4	2	KNW-47	991	20	KNW-49	42.6	1.3	KNW-25	164.1	4	KNW-20	23.24	0.41	KNW-16	4.41185	0.2607	KNW-20	14.41	0.86	-	-	-
		KNW-9	6195	87	KNW-14	1712	31	KNW-4	1207	31	KNW-44	73.7	2.1	KNW-5	1052	29	KNW-5	46.2	1.2	KNW-16	164.7	4	KNW-15	23.39	0.87	KNW-29	4.44256	0.27978	KNW-26	14.68	0.75	-	-	-
		KNW-1	6200	190	KNW-12	1713	41	KNW-46	1207	32	KNW-11	73.7	2.5	KNW-7	1053	37	KNW-2	46.4	1.9	KNW-21	166.8	2.9	KNW-29	23.39	0.43	KNW-4	4.47589	0.27536	KNW-2	14.71	0.93	-	-	-
		KNW-45	6200	120	KNW-21	1716	36	KNW-1	1209	35	KNW-1	74.5	2.7	KNW-10	1071	28	KNW-3	46.4	1.9	KNW-2	169.4	5.9	KNW-44	23.4	0.7	KNW-20	4.53396	0.26291	KNW-29	14.81	0.64	-	-	-
		KNW-36	6210	100	KNW-14	1718	32	KNW-7	1228	44	KNW-41	74.5	2.9	KNW-6	1074	37	KNW-28	46.8	1.4	KNW-23	170.6	2.7	KNW-16	23.51	0.44	KNW-12	4.54258	0.28078	KNW-1	14.95	0.93	-	-	-
		KNW-40	6210	180	KNW-2	1721	62	KNW-41	1231	30	KNW-29	74.6	3.5	KNW-4	1077	33	KNW-7	46.9	2.1	KNW-22	171.1	2.2	KNW-14	23.53	0.48	KNW-11	4.55142	0.36634	KNW-13	15.8	0.8	-	-	-
		KNW-37	6220	140	KNW-19	1723	26	KNW-47	1235	31	KNW-45	74.6	3.5	KNW-3	1084	28	KNW-4	47.1	1.7	KNW-5	171.3	5.2	KNW-19	23.54	0.55	KNW-3	4.58176	0.25829	KNW-30	15.8	1.3	-	-	-
		KNW-12	6220	110	KNW-26	1727	50	KNW-3	1244	32	KNW-42	74.8	2.8	KNW-9	1086	33	KNW-6	47.2	1.8	KNW-47	171.9	4.1	KNW-17	23.57	0.62	KNW-2	4.61509	0.2852	KNW-27	16	1.3	-	-	-
		KNW-22	6226	80	KNW-11	1728	30	KNW-27	1244	26	KNW-27	74.9	2.9	KNW-2	1094	34	KNW-9	47.7	2.1	KNW-21	172.1	2.6	KNW-40	23.64	0.72	KNW-14	4.6177	0.27215	KNW-12	16.23	0.85	-	-	-
		KNW-29	6230	210	KNW-4	1731	42	KNW-21	1245	19	KNW-10	74.9	1.8	KNW-23	1096	33	KNW-26	47.9	2.5	KNW-24	173.4	2.7	KNW-12	23.84	0.7	KNW-15	4.63498	0.2842	KNW-11	16.26	0.76	-	-	-
		KNW-31	6230	180	KNW-6	1733	95	KNW-43	1251	36	KNW-24	75	2.4	KNW-20	1097	20	KNW-16	47.9	1.7	KNW-25	174.7	3.2	KNW-13	23.9	0.76	KNW-5	4.65024	0.34003	KNW-14	16.67	0.88	-	-	-
		KNW-35	6230	160	KNW-20	1733	30	KNW-28	1252	25	KNW-22	75.1	3	KNW-27	1100	32	KNW-23	48	1.8	KNW-23	174.9	2.7	KNW-11	23.93	0.67	KNW-30	4.66529	0.36634	KNW-38	16.68	0.87	-	-	-
		KNW-50	6230	270	KNW-4	1736	47	KNW-14	1254	18	KNW-46	75.1	2.7	KNW-1	1101	28	KNW-1	48	1.8	KNW-4	175.2	5	KNW-3	23.96	0.91	KNW-39	4.71772	0.28179	KNW-43	16.9	1	-	-	-
		KNW-3	6240	210	KNW-29	1737	40	KNW-22	1256	19	KNW-35	75.2	2.5	KNW-16	1101	26	KNW-18	48	1.6	KNW-3	176.3	4.9	KNW-30	24.32	0.98	KNW-13	4.75127	0.33361	KNW-44	16.9	1.1	-	-	-
		KNW-27	6240	170	KNW-16	1738	66	KNW-24	1257	22	KNW-21	75.3	2.6	KNW-19	1105	18	KNW-20	48.3	1.3	KNW-22	176.9	2.4	KNW-7	24.4	1.3	KNW-7	4.76148	0.32698	KNW-3	17.07	0.9	-	-	-
		KNW-21	6240	190	KNW-30	1738	38	KNW-26	1259	23	KNW-4	75.3	2	KNW-18	1109	19	KNW-41	48.5	1.6	KNW-1	177.1	4.2	KNW-38	24.46	0.66	KNW-38	4.85009	0.43443	KNW-41	17.28	0.92	-	-	-
		KNW-24	6240	150	KNW-27	1739	47	KNW-25	1260	22	KNW-30	75.4	3	KNW-27	1111	27	KNW-23	48.7	1.9	KNW-7	195.2	8.7	KNW-36	24.65	0.62	KNW-8	4.85388	0.30509	KNW-40	17.3	1.1	-	-	-
		KNW-16	6250	160	KNW-18	1739	34	KNW-44	1260	28	KNW-11	75.4	3.2	KNW-17	1111	22	KNW-25	48.7	1.5	KNW-9	196.5	8	KNW-4	24.73	0.71	KNW-36	4.91155	0.52441	KNW-39	17.38	0.9	-	-	-
		KNW-46	6250	130	KNW-17	1741	30	KNW-30	1261	74	KNW-8	75.4	3	KNW-28	1112	32	KNW-42	48.7	2	KNW-10	199.5	7.1	KNW-29	24.79	0.74	KNW-40	4.92839	0.3334	KNW-45	17.4	1	-	-	-
		KNW-11	6250	110	KNW-8	1743	64	KNW-42	1262	31	KNW-26	75.6	2.8	KNW-23	1123	25	KNW-6	48.8	2.1	KNW-6	200.4	8.1	KNW-39	24.86	0.66	KNW-41	4.93944	0.50231	KNW-36	17.8	1.1	-	-	-
		KNW-38	6260	140	KNW-22	1743	29	KNW-5	1263	68	KNW-45	75.8	2.1	KNW-25	1123	26	KNW-28	48.9	1.9	KNW-8	212.5	6	KNW-45	25.13	0.85	KNW-33	5.03566	0.29766	KNW-37	17.8	1	-	-	-
		KNW-48	6260	140	KNW-19	1744	38	KNW-23	1263	16	KNW-41	75.8	3.7	KNW-42	1124	22	KNW-44	48.9	2	KNW-29	217.6	6	KNW-35	25.2	0.85	KNW-6	5.0471	0.45853	KNW-4	18.28	0.96	-	-	-
		KNW-24	6260	120	KNW-48	1744	39	KNW-1	1268	30	KNW-45	75.8	3	KNW-25	1129	38	KNW-17	49	1.2	KNW-42	218.1	4.3	KNW-2	25.2	1.1	KNW-44	5.15013	0.43001	KNW-42	18.4	1.2	-	-	-
		KNW-12	6270	180	KNW-49	1747	28	KNW-9	1271	25	KNW-6	75.8	3.9	KNW-26	1129	42	KNW-10	49	2	KNW-30	218.7	9.1	KNW-44	25.25	0.93	KNW-35	5.1656	0.33582	KNW-5	18.6	1.1	-	-	-
		KNW-21	6270	210	KNW-16	1747	37	KNW-8	1272	42	KNW-32	75.8	3.4	KNW-30	1131	33	KNW-29	49.2	2.1	KNW-41	219.1	6.2	KNW-6	25.5	1.2	KNW-35	5.21096	0.32035	KNW-8	19.1	1.1	-	-	-
		KNW-14	6270	160	KNW-12	1749	39	KNW-12	1272	29	KNW-25	75.9	3.8	KNW-29	1132	34	KNW-27	49.3	1.9	KNW-27	220.2	6.9	KNW-5	25.5	1.4	KNW-41	5.22222	0.46074	KNW-48	19.27	0.99	-	-	-
		KNW-9	6270	230	KNW-25	1750	41	KNW-26	1275	28	KNW-29	75.9	3.4	KNW-29	1133	32	KNW-19	49.3	1.7	KNW-28	222.5	3.8	KNW-32	25.53	0.64	KNW-32	5.25053	0.35329	KNW-5	19.3	1.2	-	-	-
		KNW-21	6274	85	KNW-46	1753	58	KNW-2	1275	48	KNW-36	76	2.9	KNW-41	1133	32	KNW-27	49.5	1.7	KNW-43	223.4	6.2	KNW-9	25.56	0.67	KNW-34	5.26421	0.35329	KNW-41	19.3	1.3	-	-	-
		KNW-2	6280	360	KNW-21	1754	38	KNW-12	1275	29	KNW-47	76.1	2.7	KNW-8	1135	34	KNW-30	49.5	1.9	KNW-11	226.3	4	KNW-48	25.58	0.92	KNW-48	5.29315	0.34024	KNW-9	19.37	0.95	-	-	-
		KNW-25	6280	190	KNW-31	1756	46	KNW-14	1278	25	KNW-27	76.2	2.5	KNW-30	1137	33	KNW-24	49.5	1.6	KNW-26	227	5.3	KNW-8	25.7	1.5	KNW-31	5.30999	0.36855	KNW-5	19.5	1.2	-	-	-
		KNW-10	6280	150	KNW-33	1756	49	KNW-40	1278	26	KNW-16	76.2	2.8	KNW-29	1139	28	KNW-21	49.5	1.1	KNW-44	227.3	6.3	KNW-37	25.91	0.63	KNW-32	5.31178	0.46495	KNW-14	19.6	1	-	-	-
		KNW-13	6280	130	KNW-36	1756	44	KNW-11	1279	16	KNW-10	76.3	3.6	KNW-44	1140	25	KNW-29	49.5	1.9	KNW-14	229.8	3.7	KNW-42	25.94	0.8	KNW-42	5.32988	0.43222	KNW-42	19.66	0.93	-	-	-
		KNW-39	6280	170	KNW-43	1759	55	KNW-9	1279	48	KNW-21	76.3	3	KNW-19	1141	41	KNW-27	49.6	1.7	KNW-12	230.3	5.6	KNW-40	25.99	0.57	KNW-10	5.37166	0.39065	KNW-5	19.7	1.4	-	-	-
		KNW-7	6290	160	KNW-3	1760	44	KNW-28	1280	32	KNW-28	76.4	3.2	KNW-26	1146	32	KNW-43	49.6	1.6	KNW-12	232.9	4.2	KNW-48	26.02	0.88	KNW-37	5.37366	0.45411	KNW-34	19.71	0.75	-	-	-
		KNW-21	6290	270	KNW-11	1760	42	KNW-27	1281	21	KNW-15	76.4	2.7	KNW-19	1148	25	KNW-17	49.7	2.1	KNW-13	234.4	5.2	KNW-28	26.07	0.7	KNW-32	5.38471	0.4258	KNW-2	19.8	1.4	-	-	-
		KNW-34	6290	130	KNW-37	1762	71	KNW-10	1283	47	KNW-22	76.4	1.9	KNW-13	1150	28	KNW-18	49.7	1.8	KNW-14	234.6	4.7	KNW-34	26.15	0.72	KNW-33	5.39797	0.3535	KNW-23	19.8	1.1	-	-	-
		KNW-20	6290	120	KNW-27	1762	52	KNW-45	1285	31	KNW-25	76.4	2.9	KNW-18	1150	30	KNW-30	49.7	2	KNW-11	236.1	4.2	KNW-34	26.23	0.85	KNW-9	5.39955	0.32256	KNW-9	19.85	0.97	-	-	-
		KNW-37	6290	130	KNW-2	1763	53	KNW-13	1287	28	KNW-24	76.4	1.6	KNW-21	1150	27	KNW-11	49.8	2	KNW-13	236.5	4.9	KNW-38	26.24	0.83	KNW-34	5.4287	0.3294	KNW-33	19.86	0.93	-	-	-
		KNW-41	6290	150	KNW-47	1764	52	KNW-15	1288	44	KNW-22	76.5	2.4	KNW-22	1151	44	KNW-19	49.8	1.4	KNW-3	237.3	8.4	KNW-10	26.29	0.92	KNW-37	5.43933	0.32698	KNW-1	19.9	1.4	-	-	-
		KNW-31	6293	95	KNW-9	1764	52	KNW-29	1288	21	KNW-28	76.5	3.2	KNW-14	1152	34	KNW-25	49.9	1.8	KNW-45	237.4	5.5	KNW-34	26.38	0.69	KNW-31	5.44817	0.40149	KNW-12	19.9	1.2	-	-	-
		KNW-18	6300	180	KNW-24	1764	37	KNW-15	1288	23	KNW-23	76.5	3.2	KNW-29	1152	31	KNW-42	49.9	1.5	KNW-15	238.2	4.9	KNW-46	26.46	0.58	KNW-5	5.4528	0.31393	KNW-35	19.9	1.6	-	-	-
		KNW-16	6300	200	KNW-22	1764	38	KNW-6	1296	48	KNW-49	76.5	2.5	KNW-25	1153	26	KNW-28	49.9	1.9	KNW-2	244.6	9.2	KNW-32	26.46	0.91	KNW-42	5.45501	0.4258	KNW-12	19.9	1.3	-	-	-
		KNW-22	6300	230	KNW-9	1765	47	KNW-30	1297	22	KNW-48	76.6	2.9	KNW-17	1155	22	KNW-45	49.9	2.7	KNW-15	245.1	4.7	KNW-32	26.49	0.94	KNW-40	5.45543	0.34666	KNW-19	19.9	1.2	-	-	-
		KNW-40	6310	180	KNW-42	1765	58	KNW-13	1297	27	KNW-13	76.6	2	KNW-20	1155	25	KNW-18	50	2	KNW-1	247.2	6.1	KNW-23	26.5	0.87	KNW-4	5.4568	0.34003	KNW-45	19.9	1.3	-	-	-
		KNW-34	6310	130	KNW-13	1767	33	KNW-11	1299	23	KNW-15	76.6	2.2	KNW-45	1156	37	KNW-23	50	1.2	KNW-1	248.7	7.1	KNW-31	26.5	1	KNW-39	5.46143	0.37539	KNW-30	19.98	0.79	-	-	-
		KNW-22	6320	180	KNW-15	1767	28	KNW-25	1300	33	KNW-20	76.7	2.9	KNW-43	1156	26	KNW-24	50	1.2	KNW-4	248.9	9	KNW-37	26.54	0.66	KNW-34	5.47448	0.44127	KNW-37	20	1.1	-	-	-
		KNW-11	6320	280	KNW-7	1768	59	KNW-3	1306	32	KNW-31	76.7	2.9	KNW-22	1159	32	KNW-48	50.1	1.9	KNW-2	248.9	7.6	KNW-43	26.56	0.7	KNW-47	5.499	0.33803	KNW-14	20	1.2	-	-	-
		KNW-26	6320	230	KNW-25	1771	76	KNW-7	1307	28	KNW-46	76.7	3.2	KNW-6	1159	33	KNW-30	50.1	2.1	KNW-5	249.5	5.8	KNW-36	26.6	1.1	KNW-20	5.51184	0.34024	KNW-17	20	1.6	-	-	-
		KNW-50	6320	130	KNW-40	1775	38	KNW-33	1307	25	KNW-15	76.8	3.5	KNW-24	1160	34	KNW-8	50.1	1.6	KNW-40	251.7	6	KNW-41	26.65	0.79	KNW-7	5.51626	0.35108	KNW-44	20	1.4	-	-	-
		KNW-42	6320	180	KNW-49	1775	46	KNW-4	1308	29	KNW-5	76.8	3	KNW-24	1160	34	KNW-19	50.2	2.5	KNW-20	252.4	6.3	KNW-37	26.7	1.1	KNW-40	5.51668	0.39728	KNW-48	20	1.1	-	-	-
		KNW-44	6320	170	KNW-1	1775	47	KNW-5	1310	32	KNW-28	76.8	3.1	KNW-26	1160	22	KNW-14	50.2	1.7	KNW-1	252.9	5.3	KNW-33	26.75	0.82	KNW-49	5.53594	0.4258	KNW-50	20	0.88	-	-	-
		KNW-13	6320	120	KNW-1	1776	59	KNW-36	1310	27	KNW-2	76.9	2.3	KNW-27	1160	31	KNW-20	50.2	1.9	KNW-6	253	11	KNW-5	26.79	0.79	KNW-37	5.53857	0.39486	KNW-7	20.04	0.88	-	-	-
		KNW-38	6330	150	KNW-23	1776	54	KNW-40	1311	30	KNW-40	76.9	2.7	KNW-19	1161	27	KNW-29	50.2	2.4	KNW-2	253.3	6.1	KNW-27	26.8	1.5	KNW-34	5.54236	0.40149	KNW-11	20.1	1.1	-	-	-
		KNW-14	6330	150	KNW-32	1777	64	KNW-9	1312	35	KNW-25	76.9	1.8	KNW-28	1161	27	KNW-46	50.3	2.1	KNW-14	253.8	6.7	KNW-20	26.84	0.95	KNW-5	5.54278	0.4258	KNW-20	20.1	1.1	-	-	-
		KNW-19	6330	170	KNW-30	1778	71	KNW-6	1312	68	KNW-16	77	2.4	KNW-28	1161	23	KNW-21	50.3	1.7	KNW-39	255	5.6	KNW-33	26.85	0.63	KNW-33	5.56383	0.38623	KNW-33	20.1	1.2	-	-	-
		KNW-22	6330	240	KNW-31	1781	39	KNW-20	1312	17	KNW-18	77	3	KNW-30	1161	28	KNW-22	50.4	2.2	KNW-8	255.6	7	KNW-1	26.99	0.81	KNW-10	5.56625	0.31151	KNW-6	20.1	1.1	-	-	-
		KNW-25	6330	160	KNW-46	1783	59	KNW-35	1313	31	KNW-42	77	2.2	KNW-46	1164	29	KNW-46	50.4	1.5	KNW-19	256.4	6.6	KNW-40	27	1.1	KNW-26	5.56909	0.40149	KNW-47	20.2	1.4	-	-	-
		KNW-43	6330	130	KNW-34	1784	30	KNW-31	1313	31	KNW-7	77	2.7	KNW-16	1164	33	KNW-22	50.5	2.5	KNW-13	256.9	6.2	KNW-31	27	0.74	KNW-4	5.57109	0.3314	KNW-37	20.2	1.3	-	-	-
		KNW-38	6330	170	KNW-48	1785	54	KNW-16	1314	38	KNW-2	77	3.2	KNW-24	1164	21	KNW-29	50.6	1.5	KNW-5	257.5	5	KNW-35	27.04	0.76	KNW-50	5.58856	0.39707	KNW-38	20.2	1.3	-	-	-
		KNW-22	6338	79	KNW-15	1785	39	KNW-1	1316	29	KNW-18	77.1	2.4	KNW-22	1165	43	KNW-24	50.6	2.1	KNW-5	258.1	7.5	KNW-39	27.05	0.85	KNW-44	5.59298	0.49368	KNW-9	20.2	1.2	-	-	-
		KNW-19	6340	160	KNW-39	1785	48	KNW-27	1317	32	KNW-29	77.1	2.6	KNW-30	1165	43	KNW-1	50.7	1.9	KNW-19	258.5	5.7	KNW-37	27.1	1	KNW-6	5.60182	0.35771	KNW-2	20.3	1.6	-	-	-
		KNW-32	6340	120	KNW-18	1786	58	KNW-40	1319	21	KNW-34	77.1	2.1	KNW-42	1166	28	KNW-8	50.7	1.5	KNW-36	259.9	5.6	KNW-49	27.14	0.8	KNW-46	5.62129	0.34003	KNW-14	20.3	1.2	-	-	-
		KNW-37	6340	270	KNW-38	1786	49	KNW-37	1319	40	KNW-5	77.1	3.2	KNW-41	1166	34	KNW-4	50.8	1.8	KNW-13	260.2	5.2	KNW-34	27.14	0.62	KNW-6	5.62992	0.37739	KNW-16	20.3	1.2	-	-	-
		KNW-12	6340	130	KNW-35	1787	76	KNW-45	1319	27	KNW-43	77.2	2.7	KNW-46	1166	34	KNW-16	50.8	1.8	KNW-18	260.6	9.3	KNW-31	27.18	0.97	KNW-3	5.63697	0.38844	KNW-17	20.3	1.1	-	-	-
		KNW-32	6340	160	KNW-37	1787	54	KNW-21	1320	34	KNW-9	77.2	2	KNW-15	1167	44	KNW-16	50.9	1.5	KNW-38	261.1	5.3	KNW-41	27.2	1.1	KNW-9	5.63736	0.29445	KNW-8	20.3	1.2	-	-	-
		KNW-40	6340	160	KNW-34	1788	68	KNW-10	1320	39	KNW-19	77.2	3.1	KNW-45	1168	28	KNW-16	50.9	2.1	KNW-16	261.4	3.8	KNW-49	27.2	0.78	KNW-31	5.65202	0.4981	KNW-19	20.3	1.3	-	-	-
		KNW-46	6340	130	KNW-7	1789	66	KNW-19	1321	15	KNW-19	77.2	2.7	KNW-9	1168	27	KNW-41	50.9	2.9	KNW-17	261.5	3.8	KNW-50	27.22	0.74	KNW-36	5.66749	0.4258	KNW-8	20.4	1.2	-	-	-
		KNW-28	6340	120	KNW-1	1789	58	KNW-31	1324	39	KNW-9	77.2	2.7	KNW-40	1168	22	KNW-26	51	1.6	KNW-46	261.7	7.6	KNW-39	27.23	0.77	KNW-40	5.66749	0.34445	KNW-8	20.4	1.4	-	-	-
		KNW-11	6350	210	KNW-26	1789	56	KNW-39	1324	36	KNW-43	77.2	3	KNW-1	1169	19	KNW-21	51.1	2.2	KNW-12	262.1	6.3	KNW-38	27.3	1.2	KNW-35	5.67233	0.44327	KNW-28	20.4	1.1	-	-	-
		KNW-39	6350	140	KNW-30	1790	54	KNW-32	1324	27	KNW-11	77.3	2.9	KNW-21	1170	29	KNW-10	51.1	2.3	KNW-18	262.2	2.9	KNW-43	27.32	0.73	KNW-7	5.67654	0.37518	KNW-29	20.4	1	-	-	-
		KNW-36	6350	170	KNW-3	1792	53	KNW-20	1325	35	KNW-1	77.3	2.9	KNW-23	1170	28	KNW-19	51.1	2.2	KNW-15	262.7	9.4	KNW-42	27.34	0.95	KNW-31	5.70506	0.37076	KNW-32	20.41	0.81	-	-	-
		KNW-28	6350	240	KNW-41	1793	55	KNW-22	1326	39	KNW-50	77.3	3	KNW-11	1170	35	KNW-22	51.1	1.6	KNW-18	262.7	7.9	KNW-6	27.6	1.1	KNW-2	5.7179	0.31152	KNW-27	20.5	1.2	-	-	-
		KNW-49	6350	170	KNW-6	1793	81	KNW-33	1327	25	KNW-30	77.3	3.2	KNW-24	1170	15	KNW-40	51.1	2.1	KNW-17	262.8	6.2	KNW-10	27.64	0.85	KNW-49	5.7259	0.44748	KNW-18	20.5	1.4	-	-	-
		KNW-26	6360	130	KNW-22	1796	59	KNW-34	1327	29	KNW-14	77.4	3.4	KNW-36	1170	31	KNW-26	51.3	1.8	KNW-16	263.1	5.5	KNW-50	27.65	0.71	KNW-1	5.72674	0.40591	KNW-39	20.5	1.7	-	-	-
		KNW-47	6360	160	KNW-14	1797	50	KNW-46	1329	48	KNW-41	77.4	2.3	KNW-2	1170	40	KNW-45	51.3	2.2	KNW-10	264.1	7.4	KNW-27	27.7	0.85	KNW-36	5.72695	0.49789	KNW-49	20.5	1.5	-	-	-
		KNW-12	6360	180	KNW-44	1797	53	KNW-41	1329	41	KNW-12	77.4	2.3	KNW-16	1171	28	KNW-45	51.3	2.1	KNW-37	264.1	5.8	KNW-40	27.7	1	KNW-2	5.73579	0.35992	KNW-34	20.5	1.1	-	-	-
		KNW-33	6360	150	KNW-10	1799	72	KNW-17	1329	19	KNW-2	77.4	2.3	KNW-41	1172	23	KNW-36	51.3	1.7	KNW-20	264.8	2.8	KNW-49	27.7	1.2	KNW-32	5.75126	0.41033	KNW-16	20.51	0.83	-	-	-
		KNW-36	6360	140	KNW-33	1800	37	KNW-5	1330	36	KNW-46	77.4	2.6	KNW-25	1173	20	KNW-25	51.4	2.3	KNW-44	265.2	7.5	KNW-35	27.74	0.99	KNW-43	5.75989	0.50473	KNW-35	20.53	0.85	-	-	-
		KNW-41	6360	180	KNW-10	1800	64	KNW-8	1330	48	KNW-12	77.5	1.9	KNW-5	1173	39	KNW-11	51.5	2	KNW-10	265.5	6.8	KNW-6	27.78	0.66	KNW-43	5.76652	0.45432	KNW-13	20.59	0.87	-	-	-
		KNW-44	6360	250	KNW-37	1801	59	KNW-26	1330	50	KNW-24	77.5	2.5	KNW-8	1173	29	KNW-20	51.5	1.8	KNW-17	265.8	8	KNW-46	27.79	0.83	KNW-46	5.77231	0.41675	KNW-4	20.6	1.6	-	-	-
		KNW-5	6370	210	KNW-23	1801	61	KNW-46	1330	30	KNW-27	77.5	2.5	KNW-10	1174	34	KNW-41	51.5	2.1	KNW-9	265.9	7.8	KNW-3	27.8	0.97	KNW-38	5.77736	0.45653	KNW-18	20.6	1.6	-	-	-
		KNW-30	6370	170	KNW-7	1804	37	KNW-5	1330	57	KNW-21	77.6	2.8	KNW-18	1176	31	KNW-22	51.5	1.2	KNW-19	266.2	6.6	KNW-5	27.8	1.1	KNW-47	5.78357	0.46274	KNW-44	20.6	1.3	-	-	-
		KNW-5	6370	210	KNW-10	1804	71	KNW-18	1330	16	KNW-23	77.6	2.3	KNW-28	1176	26	KNW-39	51.5	2.1	KNW-16	266.5	6.7	KNW-6	27.8	1.1	KNW-37	5.78778	0.39065	KNW-15	20.6	1.5	-	-	-
		KNW-4	6370	280	KNW-21	1805	61	KNW-37	1331	59	KNW-42	77.6	3	KNW-21	1178	15	KNW-30	51.5	1.9	KNW-7	266.5	8.8	KNW-33	27.8	0.96	KNW-39	5.79483	0.53546	KNW-39	20.6	1.1	-	-	-
		KNW-30	6370	240	KNW-32	1807	58	KNW-29	1331	33	KNW-4	77.6	3.6	KNW-45	1179	33	KNW-17	51.6	1.6	KNW-45	268.7	7.5	KNW-9	27.81	0.89	KNW-50	5.80567	0.36876	KNW-36	20.66	0.96	-	-	-
		KNW-47	6370	120	KNW-45	1808	39	KNW-39	1332	31	KNW-31	77.6	2.4	KNW-20	1180	27	KNW-13	51.6	1.7	KNW-15	269	5.3	KNW-24	27.81	0.88	KNW-38	5.80788	0.49368	KNW-47	20.7	1.2	-	-	-
		KNW-7	6370	280	KNW-39	1809	63	KNW-7	1333	33	KNW-1	77.7	2.6	KNW-44	1180	29	KNW-45	51.6	2	KNW-9	269	5.9	KNW-46	27.84	0.81	KNW-10	5.80967	0.52641	KNW-21	20.7	1.2	-	-	-
		KNW-50	6380	200	KNW-21	1809	60	KNW-30	1333	32	KNW-14	77.7	2.5	KNW-12	1180	24	KNW-1	51.6	2	KNW-18	269.1	6.4	KNW-39	27.86	0.74	KNW-8	5.8123	0.30067	KNW-46	20.7	1.4	-	-	-
		KNW-48	6380	110	KNW-34	1809	60	KNW-23	1333	47	KNW-39	77.7	2.9	KNW-18	1180	35	KNW-2	51.7	2.6	KNW-42	269.3	6	KNW-1	27.89	0.83	KNW-12	5.81872	0.38823	KNW-10	20.7	1.5	-	-	-
		KNW-4	6380	100	KNW-50	1810	61	KNW-35	1333	40	KNW-24	77.8	2.7	KNW-13	1181	26	KNW-21	51.8	1.9	KNW-11	269.5	8.5	KNW-47	27.9	1.3	KNW-48	5.82093	0.5222	KNW-15	20.73	0.85	-	-	-
		KNW-13	6380	130	KNW-6	1811	53	KNW-38	1333	25	KNW-30	77.8	3	KNW-15	1181	20	KNW-27	51.8	1.8	KNW-19	269.6	2.7	KNW-31	27.94	0.68	KNW-2	5.83419	0.37539	KNW-40	20.8	1.4	-	-	-
		KNW-14	6390	230	KNW-20	1813	63	KNW-50	1334	27	KNW-21	77.8	2	KNW-26	1181	23	KNW-3	51.9	1.9	KNW-20	269.9	7.9	KNW-50	28	0.89	KNW-13	5.8384	0.39286	KNW-50	20.8	1.2	-	-	-
		KNW-24	6390	180	KNW-32	1814	51	KNW-16	1334	19	KNW-5	77.9	3.3	KNW-48	1182	29	KNW-12	51.9	1.8	KNW-6	270	10	KNW-10	28	1.3	KNW-8	5.84061	0.46516	KNW-23	20.8	1.3	-	-	-
		KNW-36	6390	150	KNW-38	1814	67	KNW-48	1335	38	KNW-17	77.9	3	KNW-21	1182	32	KNW-14	51.9	2.4	KNW-41	270	13	KNW-35	28	1.4	KNW-23	5.8645	0.56619	KNW-37	20.8	1.1	-	-	-
		KNW-43	6390	180	KNW-26	1816	78	KNW-6	1335	46	KNW-25	77.9	2.5	KNW-3	1184	37	KNW-42	51.9	1.6	KNW-12	270.3	8.3	KNW-44	28.07	0.87	KNW-4	5.86492	0.39507	KNW-10	20.8	1.8	-	-	-
		KNW-9	6390	270	KNW-35	1816	50	KNW-43	1335	31	KNW-41	77.9	1.8	KNW-41	1184	36	KNW-25	51.9	1.6	KNW-48	270.4	7.1	KNW-7	28.1	1	KNW-1	5.87176	0.44769	KNW-47	20.8	1.3	-	-	-
		KNW-49	6390	140	KNW-43	1818	53	KNW-11	1336	34	KNW-48	77.9	3.2	KNW-12	1186	40	KNW-43	52.1	1.8	KNW-10	270.5	8.7	KNW-26	28.1	1.1	KNW-33	5.8766	0.48284	KNW-12	20.8	1	-	-	-
		KNW-12	6390	120	KNW-14	1818	53	KNW-5	1336	44	KNW-22	77.9	2.4	KNW-17	1188	25	KNW-44	52.1	1.7	KNW-14	271.4	9	KNW-36	28.19	0.73	KNW-35	5.88197	0.59871	KNW-15	20.9	1	-	-	-
		KNW-25	6390	180	KNW-18	1819	59	KNW-21	1336	36	KNW-7	78	2.6	KNW-15	1189	34	KNW-5	52.1	2	KNW-4	271.6	7.9	KNW-41	28.2	1.7	KNW-49	5.88839	0.43885	KNW-22	20.9	1.2	-	-	-
		KNW-33	6395	89	KNW-28	1819	72	KNW-30	1336	43	KNW-17	78	2.2	KNW-10	1189	27	KNW-9	52.2	1.4	KNW-43	271.7	9.4	KNW-4	28.2	1.5	KNW-43	5.89144	0.35571	KNW-38	20.9	1.3	-	-	-
		KNW-26	6400	180	KNW-20	1819	65	KNW-15	1336	19	KNW-46	78	3.7	KNW-3	1189	29	KNW-44	52.2	1.5	KNW-13	272	4.8	KNW-45	28.2	1.1	KNW-45	5.9047	0.55735	KNW-12	20.9	1.1	-	-	-
		KNW-11	6400	170	KNW-7	1820	53	KNW-18	1337	33	KNW-3	78	2.4	KNW-43	1190	30	KNW-33	52.2	2	KNW-14	272.2	6	KNW-33	28.21	0.79	KNW-45	5.90807	0.4519	KNW-18	20.9	1.4	-	-	-
		KNW-3	6400	180	KNW-38	1820	100	KNW-36	1337	32	KNW-37	78	3.5	KNW-27	1190	38	KNW-9	52.2	1.8	KNW-49	272.3	6.8	KNW-38	28.23	0.88	KNW-6	5.93901	0.46074	KNW-34	20.9	1	-	-	-
		KNW-8	6400	210	KNW-48	1821	40	KNW-1	1338	32	KNW-26	78	2.3	KNW-2	1192	49	KNW-12	52.3	1.7	KNW-41	272.8	7.5	KNW-2	28.3	1.3	KNW-16	5.9609	0.38181	KNW-34	20.99	0.92	-	-	-
		KNW-27	6400	330	KNW-17	1822	34	KNW-42	1338	42	KNW-39	78.1	3	KNW-14	1192	35	KNW-48	52.3	1.5	KNW-9	272.8	5.5	KNW-45	28.3	1.3	KNW-50	5.97437	0.41896	KNW-10	21	1.5	-	-	-
		KNW-32	6400	180	KNW-41	1824	63	KNW-20	1339	47	KNW-38	78.1	2.3	KNW-45	1192	26	KNW-28	52.3	1.4	KNW-8	273.2	9.8	KNW-8	28.34	0.93	KNW-43	5.97879	0.44769	KNW-9	21	1.7	-	-	-
		KNW-23	6400	58	KNW-26	1825	60	KNW-7	1339	38	KNW-29	78.2	2.5	KNW-11	1194	30	KNW-18	52.4	2	KNW-11	273.7	8.1	KNW-16	28.35	0.94	KNW-8	5.983	0.4499	KNW-25	21	1.2	-	-	-
		KNW-48	6410	220	KNW-10	1825	70	KNW-14	1341	35	KNW-44	78.2	3.3	KNW-9	1194	24	KNW-49	52.4	1.4	KNW-9	274.2	6.7	KNW-1	28.36	0.91	KNW-39	5.983	0.39065	KNW-42	21.03	0.89	-	-	-
		KNW-24	6410	170	KNW-16	1826	70	KNW-10	1341	34	KNW-8	78.2	2.3	KNW-16	1195	33	KNW-5	52.4	1.6	KNW-6	274.3	6.5	KNW-36	28.36	0.82	KNW-5	5.98542	0.32498	KNW-31	21.1	1.2	-	-	-
		KNW-28	6410	190	KNW-5	1829	89	KNW-41	1341	30	KNW-10	78.2	3	KNW-46	1196	31	KNW-8	52.4	2.1	KNW-1	274.3	8.5	KNW-4	28.37	0.73	KNW-36	5.98721	0.41033	KNW-32	21.1	1.2	-	-	-
		KNW-38	6410	190	KNW-5	1829	46	KNW-2	1343	55	KNW-13	78.2	2.4	KNW-47	1196	31	KNW-14	52.4	1.4	KNW-44	274.5	5.4	KNW-47	28.4	1.1	KNW-9	6.01352	0.43222	KNW-49	21.1	1.3	-	-	-
		KNW-40	6410	140	KNW-24	1830	51	KNW-3	1344	64	KNW-18	78.2	2.9	KNW-1	1199	29	KNW-13	52.6	1.6	KNW-11	274.7	4.6	KNW-47	28.42	0.99	KNW-41	6.03362	0.51799	KNW-43	21.1	1.5	-	-	-
		KNW-14	6410	100	KNW-44	1830	77	KNW-10	1344	43	KNW-6	78.3	3	KNW-42	1199	32	KNW-15	52.6	1.9	KNW-7	275.1	5.2	KNW-10	28.5	1	KNW-9	6.04067	0.38865	KNW-33	21.1	1.3	-	-	-
		KNW-29	6410	360	KNW-50	1831	47	KNW-13	1344	26	KNW-39	78.3	3	KNW-9	1204	27	KNW-5	52.6	2	KNW-16	275.5	6.4	KNW-26	28.6	1.1	KNW-38	6.04666	0.31313	KNW-13	21.2	1.2	-	-	-
		KNW-24	6411	72	KNW-6	1832	79	KNW-6	1344	39	KNW-29	78.3	3.4	KNW-44	1205	36	KNW-9	52.6	2.1	KNW-45	276.2	7.6	KNW-32	28.6	1.6	KNW-27	6.05351	0.44769	KNW-22	21.2	1.2	-	-	-
		KNW-21	6418	80	KNW-41	1834	70	KNW-48	1344	25	KNW-45	78.3	2.8	KNW-12	1206	23	KNW-23	52.7	2.2	KNW-45	276.4	9.2	KNW-9	28.7	1	KNW-47	6.05372	0.44769	KNW-39	21.2	1.1	-	-	-
		KNW-1	6420	190	KNW-27	1835	53	KNW-8	1344	29	KNW-37	78.4	2.9	KNW-49	1207	30	KNW-3	52.7	2.1	KNW-46	276.8	6.9	KNW-13	28.89	0.77	KNW-15	6.08182	0.38623	KNW-29	21.3	1.2	-	-	-
		KNW-20	6420	150	KNW-29	1836	76	KNW-38	1347	33	KNW-33	78.4	1.4	KNW-7	1207	30	KNW-9	52.8	2.2	KNW-4	277.4	6.9	KNW-8	28.9	1.1	KNW-17	6.09529	0.41938	KNW-10	21.3	1.5	-	-	-
		KNW-47	6420	140	KNW-28	1836	61	KNW-10	1347	60	KNW-14	78.4	2	KNW-23	1207	14	KNW-7	52.8	2.2	KNW-2	278.3	9.6	KNW-43	28.9	1.2	KNW-24	6.12581	0.47621	KNW-25	21.3	1.2	-	-	-
		KNW-10	6420	260	KNW-19	1837	58	KNW-26	1348	37	KNW-2	78.5	4	KNW-14	1208	28	KNW-2	52.8	2.9	KNW-8	279	5.1	KNW-48	28.9	1.1	KNW-17	6.12981	0.35329	KNW-9	21.4	1.1	-	-	-
		KNW-17	6420	160	KNW-41	1837	75	KNW-23	1348	36	KNW-13	78.5	2.8	KNW-26	1208	17	KNW-15	52.9	2.8	KNW-23	279	10	KNW-9	29.1	1.5	KNW-11	6.13044	0.39286	KNW-25	21.4	1.6	-	-	-
		KNW-27	6420	240	KNW-5	1838	86	KNW-23	1349	33	KNW-3	78.6	2.7	KNW-37	1208	24	KNW-34	52.9	1.8	KNW-29	279.2	7.9	KNW-3	29.2	0.97	KNW-15	6.13223	0.31593	KNW-11	21.4	1.3	-	-	-
		KNW-13	6430	200	KNW-45	1838	67	KNW-34	1349	26	KNW-37	78.6	2.8	KNW-11	1209	34	KNW-43	52.9	1.5	KNW-10	279.3	7.1	KNW-7	29.38	0.9	KNW-14	6.14591	0.36455	KNW-13	21.4	1.2	-	-	-
		KNW-29	6430	160	KNW-43	1839	78	KNW-35	1349	42	KNW-26	78.6	2.9	KNW-38	1210	20	KNW-47	52.9	1.9	KNW-24	279.4	8.2	KNW-12	29.48	0.77	KNW-41	6.14991	0.5483	KNW-22	21.4	1.5	-	-	-
		KNW-33	6430	160	KNW-9	1839	95	KNW-43	1349	32	KNW-31	78.6	2.1	KNW-1	1211	33	KNW-1	53	1.9	KNW-31	279.5	7.4	KNW-13	29.5	1.1	KNW-11	6.14991	0.44106	KNW-13	21.4	0.95	-	-	-
		KNW-13	6430	200	KNW-4	1840	80	KNW-22	1349	41	KNW-44	78.6	3.8	KNW-8	1212	30	KNW-12	53	1.3	KNW-27	279.9	6.2	KNW-15	29.5	1.1	KNW-13	6.16296	0.38844	KNW-36	21.49	0.97	-	-	-
		KNW-16	6430	140	KNW-9	1841	62	KNW-32	1349	26	KNW-1	78.6	2.1	KNW-14	1213	15	KNW-49	53	2.1	KNW-7	279.9	5.9	KNW-4	29.52	0.85	KNW-24	6.20411	0.33561	KNW-23	21.5	1.1	-	-	-
		KNW-1	6430	170	KNW-8	1841	69	KNW-2	1350	41	KNW-26	78.7	2.2	KNW-10	1214	27	KNW-15	53	2	KNW-50	280	4.9	KNW-19	29.6	1.3	KNW-42	6.20558	0.45232	KNW-26	21.5	1.5	-	-	-
		KNW-28	6440	190	KNW-29	1841	62	KNW-17	1350	43	KNW-9	78.8	2.3	KNW-6	1215	28	KNW-10	53.1	2.1	KNW-25	280.1	8.1	KNW-20	29.6	1.1	KNW-3	6.20895	0.44769	KNW-30	21.5	1.4	-	-	-
		KNW-35	6440	170	KNW-19	1842	40	KNW-34	1350	33	KNW-3	78.8	2.7	KNW-37	1215	31	KNW-36	53.1	2.2	KNW-3	280.1	7.7	KNW-30	29.62	0.74	KNW-48	6.21053	0.44769	KNW-11	21.5	1	-	-	-
		KNW-44	6440	210	KNW-39	1842	53	KNW-24	1351	49	KNW-19	78.9	2.6	KNW-22	1215	17	KNW-37	53.1	1.8	KNW-4	280.1	7.3	KNW-22	29.64	0.86	KNW-3	6.21905	0.5664	KNW-32	21.5	2	-	-	-
		KNW-27	6440	220	KNW-47	1844	38	KNW-42	1351	40	KNW-34	78.9	2.1	KNW-5	1216	23	KNW-41	53.1	2.2	KNW-23	280.2	7.1	KNW-11	29.65	0.92	KNW-13	6.26841	0.44769	KNW-31	21.5	1.5	-	-	-
		KNW-41	6440	370	KNW-44	1845	71	KNW-49	1351	28	KNW-27	78.9	2.1	KNW-13	1216	23	KNW-10	53.1	1.7	KNW-44	280.4	8.9	KNW-45	29.66	0.97	KNW-26	6.28125	0.46074	KNW-35	21.5	1.1	-	-	-
		KNW-45	6440	230	KNW-35	1845	63	KNW-9	1351	58	KNW-48	79	3.4	KNW-39	1217	22	KNW-26	53.1	1.3	KNW-28	280.8	8.9	KNW-7	29.7	1.2	KNW-44	6.29251	0.52641	KNW-24	21.51	0.85	-	-	-
		KNW-49	6440	220	KNW-13	1845	47	KNW-37	1351	31	KNW-4	79	2.7	KNW-36	1218	24	KNW-39	53.2	1.9	KNW-28	280.9	6	KNW-28	29.7	1.4	KNW-15	6.31198	0.45632	KNW-49	21.52	0.91	-	-	-
		KNW-1	6440	340	KNW-49	1846	66	KNW-38	1352	19	KNW-49	79.1	3.1	KNW-44	1219	28	KNW-6	53.2	2.2	KNW-5	281	13	KNW-17	29.8	1	KNW-15	6.32282	0.40812	KNW-28	21.6	1.7	-	-	-
		KNW-23	6440	150	KNW-39	1847	67	KNW-49	1352	27	KNW-2	79.1	3.3	KNW-10	1220	41	KNW-37	53.2	1.6	KNW-26	281.3	4.7	KNW-17	29.8	1.2	KNW-19	6.32945	0.48905	KNW-46	21.6	1.4	-	-	-
		KNW-45	6450	170	KNW-46	1847	61	KNW-9	1353	43	KNW-8	79.1	2.7	KNW-40	1220	29	KNW-15	53.3	1.5	KNW-34	281.3	6.1	KNW-44	29.82	0.84	KNW-19	6.33124	0.48905	KNW-1	21.6	1.2	-	-	-
		KNW-34	6450	140	KNW-45	1848	51	KNW-38	1353	32	KNW-12	79.1	2.1	KNW-43	1220	26	KNW-20	53.3	2	KNW-41	282.2	5.8	KNW-5	29.9	1.4	KNW-16	6.35997	0.44106	KNW-4	21.6	1.3	-	-	-
		KNW-18	6450	270	KNW-12	1848	42	KNW-7	1354	31	KNW-3	79.2	2.7	KNW-40	1221	19	KNW-43	53.3	1.4	KNW-20	282.5	9.1	KNW-2	30	1.7	KNW-20	6.36502	0.44106	KNW-41	21.7	1.7	-	-	-
		KNW-15	6460	190	KNW-34	1849	43	KNW-12	1355	36	KNW-15	79.2	3.1	KNW-4	1221	24	KNW-6	53.4	1.8	KNW-27	282.7	7.2	KNW-3	30	1.1	KNW-12	6.38207	0.36876	KNW-43	21.7	1.1	-	-	-
		KNW-6	6460	280	KNW-47	1849	54	KNW-16	1355	33	KNW-12	79.2	2.2	KNW-11	1222	21	KNW-49	53.5	1.8	KNW-32	282.7	7.1	KNW-8	30.1	1.6	KNW-44	6.39091	0.42138	KNW-50	21.7	1.3	-	-	-
		KNW-8	6460	260	KNW-5	1850	78	KNW-44	1355	56	KNW-17	79.2	2.4	KNW-20	1223	35	KNW-50	53.5	2.3	KNW-35	283.1	5.4	KNW-14	30.2	0.96	KNW-22	6.40722	0.51778	KNW-15	21.7	1.2	-	-	-
		KNW-39	6460	140	KNW-26	1851	69	KNW-36	1356	35	KNW-28	79.2	1.7	KNW-50	1223	31	KNW-44	53.5	2.2	KNW-27	283.1	6.8	KNW-2	30.2	1.1	KNW-42	6.41238	0.43222	KNW-26	21.8	1.5	-	-	-
		KNW-5	6460	380	KNW-11	1854	55	KNW-37	1356	32	KNW-23	79.2	1.6	KNW-38	1226	31	KNW-37	53.5	1.8	KNW-47	283.2	6	KNW-11	30.2	1.2	KNW-45	6.41301	0.57019	KNW-35	21.86	0.98	-	-	-
		KNW-43	6460	150	KNW-17	1854	42	KNW-13	1357	39	KNW-47	79.3	2.8	KNW-27	1226	20	KNW-24	53.6	2	KNW-12	283.2	6.5	KNW-21	30.3	1.5	KNW-21	6.41901	0.34666	KNW-36	21.9	1.7	-	-	-
		KNW-15	6474	99	KNW-23	1855	63	KNW-28	1358	45	KNW-50	79.3	3.3	KNW-47	1228	26	KNW-47	53.6	2	KNW-27	283.2	4.1	KNW-16	30.4	1.1	KNW-21	6.42848	0.53767	KNW-38	21.9	1.5	-	-	-
		KNW-17	6480	190	KNW-2	1856	66	KNW-24	1358	34	KNW-39	79.3	2.8	KNW-16	1228	15	KNW-34	53.6	1.9	KNW-35	283.5	8.5	KNW-27	30.41	0.74	KNW-7	6.43711	0.52862	KNW-41	21.9	1.6	-	-	-
		KNW-42	6480	150	KNW-15	1856	81	KNW-33	1358	38	KNW-25	79.3	2.3	KNW-7	1229	24	KNW-38	53.6	1.8	KNW-43	284.4	6.5	KNW-29	30.78	0.89	KNW-14	6.43932	0.32035	KNW-43	21.9	1.5	-	-	-
		KNW-46	6480	220	KNW-16	1856	71	KNW-18	1359	47	KNW-8	79.4	2.8	KNW-34	1229	21	KNW-17	53.6	1.6	KNW-47	284.6	6.7	KNW-25	30.87	0.91	KNW-23	6.44353	0.43222	KNW-2	21.9	1.9	-	-	-
		KNW-42	6480	260	KNW-28	1858	62	KNW-35	1359	36	KNW-20	79.4	2	KNW-48	1229	29	KNW-37	53.7	1.9	KNW-42	284.7	8.2	KNW-15	30.9	0.88	KNW-12	6.49215	0.44127	KNW-14	21.9	1.3	-	-	-
		KNW-17	6480	140	KNW-27	1859	78	KNW-22	1359	51	KNW-40	79.4	2.9	KNW-28	1229	30	KNW-11	53.7	1.8	KNW-26	285	10	KNW-24	31	1.2	KNW-14	6.54677	0.40612	KNW-4	21.98	0.92	-	-	-
		KNW-45	6480	150	KNW-27	1860	52	KNW-24	1359	36	KNW-47	79.4	1.8	KNW-17	1229	13	KNW-38	53.7	2.6	KNW-30	285.5	7.5	KNW-15	31	1.2	KNW-18	6.56424	0.49147	KNW-19	22	1.2	-	-	-
		KNW-50	6490	140	KNW-33	1860	46	KNW-27	1360	40	KNW-9	79.5	3.1	KNW-33	1230	32	KNW-7	53.7	1.7	KNW-21	285.6	8.4	KNW-11	31.29	0.9	KNW-10	6.56718	0.41917	KNW-20	22	1.1	-	-	-
		KNW-31	6490	160	KNW-15	1861	66	KNW-4	1361	40	KNW-13	79.5	1.8	KNW-35	1230	22	KNW-26	53.7	1.8	KNW-50	285.7	8.7	KNW-42	31.3	1.3	KNW-27	6.59939	0.34245	KNW-7	22	1.6	-	-	-
		KNW-35	6490	240	KNW-11	1861	94	KNW-18	1361	37	KNW-36	79.5	3	KNW-4	1231	38	KNW-1	53.8	1.7	KNW-37	285.7	9.2	KNW-12	31.4	1.1	KNW-24	6.64917	0.44769	KNW-32	22	1.4	-	-	-
		KNW-11	6490	110	KNW-8	1862	63	KNW-31	1362	26	KNW-12	79.6	2.1	KNW-13	1232	24	KNW-10	53.8	2	KNW-47	285.9	8.2	KNW-12	31.5	1.3	KNW-28	6.66948	0.56819	KNW-10	22	1.6	-	-	-
		KNW-29	6490	140	KNW-31	1863	51	KNW-50	1362	35	KNW-34	79.6	1.9	KNW-31	1232	32	KNW-4	53.8	2.3	KNW-30	286	6.6	KNW-18	31.5	1.2	KNW-30	6.68095	0.52662	KNW-24	22.1	2	-	-	-
		KNW-41	6500	170	KNW-36	1865	67	KNW-21	1362	47	KNW-22	79.6	1.9	KNW-12	1232	25	KNW-29	53.8	2	KNW-28	286.1	8.7	KNW-19	31.6	1.1	KNW-29	6.68253	0.46516	KNW-11	22.1	1.1	-	-	-
		KNW-7	6500	290	KNW-42	1865	53	KNW-14	1362	30	KNW-28	79.6	2.4	KNW-1	1233	28	KNW-4	53.8	1.6	KNW-15	286.2	6.4	KNW-14	31.9	1.2	KNW-22	6.68495	0.40149	KNW-7	22.2	1.2	-	-	-
		KNW-16	6500	150	KNW-19	1865	89	KNW-19	1362	50	KNW-35	79.7	3.2	KNW-2	1233	35	KNW-32	53.9	1.9	KNW-8	286.6	8.1	KNW-22	31.97	0.82	KNW-11	6.70884	0.41938	KNW-33	22.3	1.6	-	-	-
		KNW-10	6500	370	KNW-30	1865	61	KNW-32	1363	33	KNW-16	79.7	1.9	KNW-7	1233	25	KNW-34	53.9	2.6	KNW-29	286.9	8.2	KNW-14	32.05	0.82	KNW-30	6.70947	0.45874	KNW-20	22.3	1.2	-	-	-
		KNW-30	6500	370	KNW-36	1866	47	KNW-17	1363	35	KNW-21	79.7	1.8	KNW-39	1233	29	KNW-8	54	1.9	KNW-33	287.3	5.8	KNW-13	32.1	1.2	KNW-11	6.71705	0.5724	KNW-48	22.4	1.3	-	-	-
		KNW-48	6510	200	KNW-40	1866	77	KNW-41	1364	49	KNW-23	79.7	1.9	KNW-13	1233	15	KNW-13	54	2	KNW-40	287.4	4.9	KNW-30	32.3	1.1	KNW-14	6.7201	0.44085	KNW-28	22.4	1.3	-	-	-
		KNW-2	6510	240	KNW-12	1867	74	KNW-31	1364	23	KNW-38	79.7	2.7	KNW-18	1233	17	KNW-42	54.1	2.4	KNW-49	287.4	8.6	KNW-11	32.31	0.97	KNW-25	6.74178	0.58366	KNW-45	22.5	2	-	-	-
		KNW-47	6510	290	KNW-20	1867	96	KNW-15	1365	24	KNW-3	79.7	2.5	KNW-14	1234	21	KNW-31	54.1	1.3	KNW-48	287.5	7.4	KNW-13	32.48	0.65	KNW-21	6.76588	0.45853	KNW-44	22.5	1.6	-	-	-
		KNW-2	6510	330	KNW-6	1868	67	KNW-25	1365	46	KNW-35	79.8	2.8	KNW-5	1235	25	KNW-6	54.2	2	KNW-50	287.7	5.2	KNW-18	32.5	1	KNW-23	6.76988	0.36213	KNW-7	22.6	1.1	-	-	-
		KNW-3	6510	220	KNW-38	1869	64	KNW-28	1365	50	KNW-50	79.8	3	KNW-8	1236	30	KNW-8	54.2	2.3	KNW-37	288	10	KNW-18	32.5	1.7	KNW-18	6.77472	0.55293	KNW-6	22.7	1.7	-	-	-
		KNW-25	6510	150	KNW-20	1870	65	KNW-19	1366	28	KNW-30	79.8	2.5	KNW-37	1237	26	KNW-50	54.2	2.5	KNW-22	288	10	KNW-16	32.58	0.92	KNW-45	6.78377	0.53546	KNW-40	22.8	1.8	-	-	-
		KNW-25	6520	170	KNW-11	1872	66	KNW-30	1366	37	KNW-20	79.9	3.3	KNW-38	1237	31	KNW-35	54.2	1.6	KNW-6	288.1	6.7	KNW-19	32.6	0.98	KNW-12	6.79356	1.71394	KNW-16	22.9	1.4	-	-	-
		KNW-26	6520	120	KNW-2	1874	64	KNW-33	1366	25	KNW-43	79.9	2.8	KNW-49	1237	36	KNW-36	54.2	1.8	KNW-46	288.3	6.5	KNW-12	32.7	1.2	KNW-25	6.86228	0.36655	KNW-24	22.96	0.78	-	-	-
		KNW-33	6520	130	KNW-4	1875	70	KNW-29	1367	46	KNW-20	79.9	2.5	KNW-34	1237	22	KNW-47	54.2	1.6	KNW-29	288.4	4.9	KNW-15	32.7	0.97	KNW-20	6.8727	0.38181	KNW-26	23	1.5	-	-	-
		KNW-39	6520	150	KNW-33	1877	78	KNW-12	1367	35	KNW-13	80	2.3	KNW-35	1238	25	KNW-48	54.2	2.2	KNW-25	289.2	8.5	KNW-21	32.8	1	KNW-46	6.87343	0.58387	KNW-42	23.1	1.2	-	-	-
		KNW-4	6520	110	KNW-50	1877	74	KNW-44	1368	38	KNW-4	80.1	2.9	KNW-37	1239	34	KNW-39	54.2	2.1	KNW-42	289.3	8	KNW-25	33.1	1.3	KNW-16	6.88617	0.47179	KNW-6	23.2	2.2	-	-	-
		KNW-3	6530	210	KNW-1	1878	88	KNW-11	1368	37	KNW-42	80.2	1.9	KNW-50	1240	25	KNW-46	54.2	2	KNW-7	289.6	7.1	KNW-27	33.2	1.7	KNW-9	6.92837	0.45853	KNW-21	23.3	1.7	-	-	-
		KNW-30	6530	240	KNW-13	1878	43	KNW-28	1368	28	KNW-33	80.2	2.8	KNW-42	1240	29	KNW-50	54.2	1.7	KNW-24	289.7	8.1	KNW-28	33.5	1.2	KNW-22	6.9671	0.52641	KNW-45	23.3	1.3	-	-	-
		KNW-15	6540	270	KNW-14	1881	77	KNW-50	1368	55	KNW-40	80.3	2.8	KNW-6	1240	30	KNW-15	54.2	1.6	KNW-17	289.7	5.9	KNW-21	33.86	0.8	KNW-13	6.99646	0.51136	KNW-6	23.4	1.3	-	-	-
		KNW-1	6540	130	KNW-15	1882	76	KNW-45	1369	28	KNW-36	80.3	3.3	KNW-43	1241	32	KNW-17	54.3	1.7	KNW-37	290.4	5.2	KNW-20	33.88	0.93	KNW-27	7.01718	0.46537	KNW-28	23.5	1.4	-	-	-
		KNW-26	6540	140	KNW-8	1885	92	KNW-4	1369	39	KNW-5	80.3	1.9	KNW-15	1241	27	KNW-40	54.3	1.9	KNW-26	290.6	7.2	KNW-24	34	1.6	KNW-21	7.02677	0.51136	KNW-17	23.7	0.98	-	-	-
		KNW-2	6550	330	KNW-1	1885	75	KNW-8	1369	56	KNW-6	80.3	2.4	KNW-30	1241	25	KNW-14	54.3	1.6	KNW-22	290.7	7.9	KNW-26	34.17	0.93	KNW-22	7.03519	0.53525	KNW-31	23.7	1.2	-	-	-
		KNW-49	6560	150	KNW-25	1886	36	KNW-29	1369	38	KNW-16	80.3	2.4	KNW-32	1243	27	KNW-28	54.3	1.8	KNW-30	290.7	5.3	KNW-24	34.18	0.92	KNW-17	7.06592	0.51578	KNW-29	23.8	1.3	-	-	-
		KNW-42	6560	180	KNW-23	1888	67	KNW-47	1370	26	KNW-48	80.3	2.8	KNW-31	1243	25	KNW-2	54.4	2	KNW-21	290.9	9.4	KNW-14	34.29	0.97	KNW-25	7.07276	0.4278	KNW-40	23.9	1.1	-	-	-
		KNW-7	6560	240	KNW-48	1888	74	KNW-25	1370	46	KNW-11	80.3	1.5	KNW-35	1244	37	KNW-5	54.5	2.2	KNW-28	290.9	6.5	KNW-23	34.3	1.5	KNW-7	7.0816	0.36655	KNW-31	24	2	-	-	-
		KNW-2	6560	200	KNW-28	1888	82	KNW-43	1371	42	KNW-19	80.3	2	KNW-15	1244	22	KNW-36	54.5	1.9	KNW-35	291.4	7.3	KNW-17	34.5	1.1	KNW-19	7.09791	0.37981	KNW-21	24.14	0.92	-	-	-
		KNW-3	6560	170	KNW-17	1889	63	KNW-27	1371	42	KNW-31	80.4	2.6	KNW-34	1245	25	KNW-38	54.5	1.7	KNW-34	291.8	6.4	KNW-25	34.6	1.3	KNW-23	7.13401	0.57924	KNW-7	24.2	1.6	-	-	-
		KNW-5	6570	250	KNW-10	1890	130	KNW-39	1372	52	KNW-43	80.4	3.2	KNW-32	1245	37	KNW-32	54.5	2.6	KNW-48	291.9	7.2	KNW-22	34.7	1.6	KNW-25	7.17884	0.40391	KNW-3	25	1.6	-	-	-
		KNW-9	6570	140	KNW-3	1890	64	KNW-19	1372	57	KNW-14	80.4	1.7	KNW-5	1247	36	KNW-16	54.5	1.2	KNW-33	292.1	6	KNW-21	34.8	1.3	KNW-28	7.23241	0.36434	KNW-3	25.1	1.2	-	-	-
		KNW-10	6570	120	KNW-22	1892	81	KNW-40	1373	27	KNW-16	80.5	1.8	KNW-39	1247	33	KNW-27	54.6	1.1	KNW-22	292.2	7.2	KNW-23	35.1	1.1	KNW-10	7.23325	0.48926	KNW-6	25.2	2.4	-	-	-
		KNW-31	6570	150	KNW-40	1893	63	KNW-12	1373	41	KNW-20	80.5	2	KNW-2	1247	37	KNW-40	54.7	1.7	KNW-30	293	8.1	KNW-30	35.3	1.6	KNW-8	7.24588	0.6206	KNW-1	25.4	1.7	-	-	-
		KNW-18	6576	93	KNW-13	1894	60	KNW-39	1374	28	KNW-7	80.6	2.7	KNW-12	1247	29	KNW-12	54.7	1.5	KNW-23	293.3	7.8	KNW-29	36	1.7	KNW-30	7.28103	0.50915	KNW-8	25.8	1.7	-	-	-
		KNW-9	6580	460	KNW-16	1894	53	KNW-47	1375	30	KNW-33	80.7	2.9	KNW-50	1248	40	KNW-13	54.7	1.7	KNW-34	293.5	6	KNW-23	36	1.6	KNW-27	7.31618	0.50915	KNW-21	26.73	0.95	-	-	-
		KNW-23	6580	260	KNW-9	1897	86	KNW-13	1375	25	KNW-49	80.7	2.9	KNW-19	1248	18	KNW-14	54.7	1.5	KNW-33	294	5	KNW-28	36.1	1.3	KNW-24	7.35333	0.52662	KNW-24	26.8	1.1	-	-	-
		KNW-4	6580	280	KNW-2	1900	110	KNW-32	1379	52	KNW-10	80.7	2.3	KNW-9	1249	34	KNW-19	54.7	1	KNW-34	294.3	5.5	KNW-7	36.2	2.2	KNW-18	7.42342	0.69332	KNW-3	26.9	1.8	-	-	-
		KNW-19	6583	68	KNW-43	1900	63	KNW-14	1381	37	KNW-14	80.7	3	KNW-33	1249	26	KNW-12	54.9	2	KNW-35	294.4	5.5	KNW-26	36.4	1.6	KNW-6	7.43089	0.75499	KNW-22	27.2	1	-	-	-
		KNW-18	6590	450	KNW-42	1900	83	KNW-3	1381	45	KNW-26	80.7	4.3	KNW-20	1250	15	KNW-33	55	2	KNW-32	295.2	7	KNW-8	36.4	2	KNW-22	7.5134	0.44969	KNW-15	27.6	1.6	-	-	-
		KNW-34	6590	170	KNW-24	1901	97	KNW-6	1382	50	KNW-6	80.8	2.3	KNW-29	1251	24	KNW-7	55.1	2.3	KNW-36	295.2	6.8	KNW-9	37	1.7	KNW-2	7.59033	0.48042	KNW-23	27.7	1.1	-	-	-
		KNW-16	6591	88	KNW-21	1901	62	KNW-45	1385	48	KNW-4	80.8	2.9	KNW-35	1252	33	KNW-31	55.1	1.3	KNW-39	295.4	6.3	KNW-25	37.3	1.2	KNW-29	7.60075	0.42559	KNW-25	28.4	1.3	-	-	-
		KNW-27	6600	210	KNW-29	1902	79	KNW-8	1385	54	KNW-17	80.8	2.1	KNW-38	1253	37	KNW-11	55.1	2.1	KNW-3	295.7	7.5	KNW-29	37.7	1.8	KNW-26	7.61422	0.50894	KNW-2	29.8	1.6	-	-	-
		KNW-28	6600	200	KNW-32	1903	72	KNW-26	1388	43	KNW-50	80.9	2.7	KNW-4	1253	32	KNW-35	55.2	1.9	KNW-26	296.2	5.5	KNW-6	38.1	2.3	KNW-21	7.64316	0.39949	KNW-1	30.5	1.4	-	-	-
		KNW-6	6610	200	KNW-31	1903	68	KNW-11	1389	46	KNW-7	80.9	2.6	KNW-49	1253	25	KNW-20	55.2	1.5	KNW-36	296.3	8.5	KNW-22	38.1	1.4	KNW-24	7.68631	0.31393	KNW-27	30.9	2.3	-	-	-
		KNW-20	6618	77	KNW-25	1905	47	KNW-47	1390	59	KNW-18	80.9	1.6	KNW-11	1255	23	KNW-32	55.3	1.8	KNW-38	296.4	8.1	KNW-22	38.19	0.8	KNW-3	7.75303	0.48284	KNW-3	31	1.5	-	-	-
		KNW-43	6620	190	KNW-8	1905	59	KNW-44	1391	32	KNW-11	81	2.5	KNW-36	1257	25	KNW-33	55.3	2.2	KNW-43	296.7	7.3	KNW-21	38.21	0.71	KNW-46	7.94804	0.67806	KNW-5	31.2	1.5	-	-	-
		KNW-8	6620	280	KNW-30	1909	64	KNW-2	1391	48	KNW-19	81	2.1	KNW-34	1257	30	KNW-11	55.3	2.1	KNW-38	296.8	6.5	KNW-24	38.26	0.61	KNW-23	7.98877	0.3555	KNW-4	31.8	1.8	-	-	-
		KNW-4	6630	310	KNW-3	1910	130	KNW-4	1392	44	KNW-36	81.1	2.5	KNW-39	1258	41	KNW-30	55.3	1.6	KNW-49	297.1	6.5	KNW-2	38.9	1.4	KNW-25	8.12758	0.4499	KNW-46	36.5	1.5	-	-	-
		KNW-8	6630	490	KNW-3	1910	100	KNW-34	1396	36	KNW-32	81.2	3.1	KNW-32	1259	30	KNW-18	55.3	1.2	KNW-32	297.8	5.2	KNW-3	39.2	1.1	KNW-28	8.13358	0.48063	KNW-25	36.7	1.5	-	-	-
		KNW-37	6640	340	KNW-35	1912	75	KNW-36	1396	42	KNW-35	81.2	2.5	KNW-33	1261	25	KNW-35	55.4	1.6	KNW-25	298.2	7.7	KNW-10	39.5	2.6	KNW-19	8.1822	0.48505	KNW-50	37.2	1.5	-	-	-
		KNW-30	6640	120	KNW-12	1912	59	KNW-49	1397	51	KNW-24	81.2	2.3	KNW-17	1261	30	KNW-31	55.5	1.8	KNW-38	298.6	6.9	KNW-48	39.7	1.1	KNW-17	8.18241	0.44327	KNW-49	38.6	1.7	-	-	-
		KNW-18	6645	86	KNW-42	1912	67	KNW-16	1398	30	KNW-32	81.3	3.1	KNW-7	1262	33	KNW-35	55.6	1.7	KNW-32	298.7	8.1	KNW-46	40.17	0.81	KNW-16	8.27681	0.54188	KNW-48	38.7	1.2	-	-	-
		KNW-17	6649	51	KNW-18	1913	90	KNW-17	1400	48	KNW-1	81.4	2.4	KNW-8	1263	40	KNW-33	55.6	1.4	KNW-39	299.2	7.4	KNW-49	40.52	0.92	KNW-5	8.29407	0.4278	KNW-24	39.9	2	-	-	-
		KNW-17	6650	340	KNW-22	1913	85	KNW-48	1403	41	KNW-32	81.4	2.2	KNW-47	1263	25	KNW-7	55.8	2.3	KNW-29	300.5	7.6	KNW-25	41	1.1	KNW-29	8.34911	0.43464	KNW-21	40.8	1.7	-	-	-
		KNW-35	6650	260	KNW-4	1918	69	KNW-1	1408	65	KNW-34	81.4	2.5	KNW-48	1264	27	KNW-39	55.8	1.6	KNW-36	300.6	7.7	KNW-5	41.1	1.8	KNW-4	8.38826	0.474	KNW-47	41.2	1.6	-	-	-
		KNW-8	6660	420	KNW-37	1918	67	KNW-20	1410	47	KNW-44	81.4	3	KNW-36	1265	32	KNW-2	55.9	1.8	KNW-39	301.3	7	KNW-1	41.4	1.7	KNW-18	8.60516	0.54009	KNW-19	42.2	1.4	-	-	-
		KNW-44	6660	270	KNW-46	1919	61	KNW-3	1411	60	KNW-38	81.5	3.3	KNW-33	1269	33	KNW-32	56.2	2.1	KNW-3	301.3	8.7	KNW-4	41.9	1.4	KNW-49	8.66199	0.60555	KNW-18	43.3	2.7	-	-	-
		KNW-46	6670	190	KNW-49	1922	61	KNW-42	1425	45	KNW-33	81.6	3.3	KNW-4	1269	28	KNW-31	56.3	2	KNW-40	303	7.6	KNW-23	42.5	0.79	KNW-1	8.68209	0.55072	KNW-17	43.4	1.7	-	-	-
		KNW-7	6720	200	KNW-36	1925	65	KNW-15	1428	38	KNW-38	81.6	2.7	KNW-31	1269	23	KNW-34	56.4	1.7	KNW-31	303.4	6	KNW-17	42.72	0.91	KNW-48	8.68914	0.43906	KNW-22	43.6	1.8	-	-	-
		KNW-5	6720	280	KNW-47	1930	92	KNW-18	1430	38	KNW-47	81.9	2.4	KNW-40	1282	20	KNW-13	56.4	1.8	KNW-24	303.4	7.9	KNW-19	43.5	1.2	KNW-28	8.71574	0.59997	KNW-20	44	1.7	-	-	-
		KNW-20	6730	230	KNW-18	1937	75	KNW-20	1433	32	KNW-49	81.9	2.1	KNW-31	1284	23	KNW-38	56.6	2.1	KNW-31	303.4	6.8	KNW-20	43.5	1.5	KNW-20	8.73934	0.4499	KNW-46	45.6	1.6	-	-	-
		KNW-6	6750	270	KNW-45	1941	69	KNW-17	1441	31	KNW-18	81.9	2.1	KNW-32	1290	25	KNW-40	56.7	1.7	KNW-33	303.5	6.9	KNW-47	43.9	1	KNW-26	9.04706	0.86002	KNW-16	46.4	1.9	-	-	-
		KNW-32	6760	120	KNW-44	1957	57	KNW-46	1446	47	KNW-17	82.3	2.1	KNW-6	1292	33	KNW-4	56.8	1.9	KNW-21	312	11	KNW-18	44.5	1.8	KNW-47	9.27196	0.80519	KNW-27	47.4	2.1	-	-	-
		KNW-19	6820	320	KNW-24	1960	94	KNW-19	1446	24	KNW-40	82.4	3.1	KNW-3	1297	38	KNW-3	57.3	2	KNW-31	312.3	6.9	KNW-16	44.6	1.8	KNW-50	9.31111	0.70195	KNW-23	49.5	1.8	-	-	-
		KNW-10	7040	620	KNW-7	1980	130	KNW-16	1476	38	KNW-37	82.5	2.8	KNW-3	1303	38	KNW-3	58.1	2.1	KNW-40	318.2	6.9	KNW-50	44.9	1.3	KNW-1	14.2979	5.9229	KNW-30	49.7	2.3	-	-	-
	IG-CAGS	KNW-11	5870	140	KNW-4	1649	67	KNW-2	1271	47	KNW-10	56	2.9	KNW-10	1119	41	KNW-10	51	3.3	KNW-10	205	10	KNW-3	25.8	1.4	-	-	-	KNW-4	18.9	1.8	KNW-11	654	31
		KNW-15	5990	220	KNW-6	1650	59	KNW-3	1301	64	KNW-11	57.2	3.2	KNW-11	1173	38	KNW-9	51.8	2.7	KNW-11	242	12	KNW-13	27.3	1.5	-	-	-	KNW-9	19.5	1.2	KNW-7	696	37
		KNW-9	6140	230	KNW-5	1668	66	KNW-9	1308	47	KNW-9	81.8	3	KNW-15	1186	50	KNW-12	52.5	4.5	KNW-7	263	20	KNW-9	27.4	2.1	-	-	-	KNW-1	19.8	1	KNW-10	741	62
		KNW-1	6160	180	KNW-15	1673	61	KNW-1	1316	67	KNW-6	82.1	2.6	KNW-9	1190	39	KNW-11	52.7	3.4	KNW-9	269	17	KNW-4	27.6	2.2	-	-	-	KNW-3	19.8	1.4	KNW-3	855	53
		KNW-13	6290	200	KNW-8	1693	75	KNW-8	1324	47	KNW-8	82.3	3.7	KNW-2	1206	49	KNW-2	52.8	3.3	KNW-3	273	16	KNW-2	28	1.6	-	-	-	KNW-11	20.2	1.4	KNW-8	870	50
		KNW-3	6310	230	KNW-1	1694	75	KNW-5	1325	58	KNW-15	82.3	3.2	KNW-14	1218	50	KNW-14	52.9	3.6	KNW-4	273	19	KNW-1	28.2	1.6	-	-	-	KNW-2	20.3	2.1	KNW-2	928	48
		KNW-12	6310	230	KNW-3	1706	83	KNW-13	1327	38	KNW-7	82.8	3.7	KNW-13	1233	36	KNW-3	53.1	4.1	KNW-13	274	10	KNW-7	28.2	2.4	-	-	-	KNW-6	21.3	1.6	KNW-12	940	55
		KNW-8	6320	390	KNW-9	1709	86	KNW-6	1331	44	KNW-4	84.4	4	KNW-16	1240	66	KNW-15	53.5	2.9	KNW-12	275	19	KNW-14	28.9	1.9	-	-	-	KNW-8	21.6	1.6	KNW-15	955	40
		KNW-10	6330	380	KNW-13	1716	69	KNW-11	1338	53	KNW-1	84.8	3.9	KNW-3	1246	63	KNW-4	54.7	4.3	KNW-8	276	15	KNW-15	28.9	1.8	-	-	-	KNW-7	22	1.6	KNW-6	956	51
		KNW-4	6350	210	KNW-7	1722	80	KNW-14	1346	82	KNW-14	84.9	3.3	KNW-7	1251	63	KNW-13	54.8	2.5	KNW-2	277	15	KNW-12	29.5	2.4	-	-	-	KNW-5	22.2	1.9	KNW-5	983	52
		KNW-14	6350	220	KNW-12	1725	59	KNW-12	1351	61	KNW-2	85.1	2.9	KNW-12	1253	55	KNW-7	55.3	4.9	KNW-15	282	11	KNW-6	29.8	1.6	-	-	-	KNW-12	22.3	1.5	KNW-14	1004	60
		KNW-16	6350	310	KNW-16	1727	79	KNW-15	1353	60	KNW-3	85.5	3.4	KNW-1	1264	41	KNW-1	55.6	4.3	KNW-14	283	17	KNW-5	30	2.4	-	-	-	KNW-14	22.5	1.6	KNW-9	1140	300
		KNW-6	6390	200	KNW-10	1733	61	KNW-16	1358	65	KNW-5	85.8	3.1	KNW-8	1275	42	KNW-8	56.1	3.4	KNW-1	285	14	KNW-16	30.2	2.2	-	-	-	KNW-13	22.9	1.4	KNW-1	1120	130
		KNW-2	6550	380	KNW-11	1740	51	KNW-7	1360	110	KNW-12	85.9	3.5	KNW-4	1283	59	KNW-5	56.4	3.7	KNW-6	292	14	KNW-8	31.3	1.8	-	-	-	KNW-15	23.7	1.8	KNW-4	1730	560
		KNW-7	6610	370	KNW-14	1754	84	KNW-4	1372	83	KNW-16	86.3	3.3	KNW-6	1285	51	KNW-6	56.6	2.9	KNW-5	296	21	KNW-11	34.5	2	-	-	-	KNW-16	26.2	2.7	KNW-16	1820	370
		KNW-5	6850	430	KNW-2	1807	87	KNW-10	1385	79	KNW-13	87.1	3.3	KNW-5	1289	43	KNW-16	60.3	5.1	KNW-16	303	22	KNW-10	35.7	1.9	-	-	-	KNW-10	50.8	5.3	KNW-13	1920	530
	IGG2	KNW-17	6062.61	537.46	KNW-10	1726	132.18	KNW-36	1175.03	143.54	KNW-11	49.58	4.74	KNW-22	805.46	68.74	KNW-21	32.24	3.24	KNW-36	137.55	16.98	KNW-33	26.13	4.02	KNW-30	5.21922	0.428474	KNW-18	18.53	1.86	KNW-32	471.24	67.98
		KNW-22	6095.74	450.4	KNW-34	1733.71	425.86	KNW-38	1178.33	146.38	KNW-10	58.85	5.44	KNW-21	809.8	68.78	KNW-22	32.24	3.22	KNW-37	137.62	17.12	KNW-40	26.37	4.38	KNW-40	5.23588	0.45832	KNW-17	18.72	1.86	KNW-16	519.27	64
		KNW-27	6111.29	468.68	KNW-13	1742.67	135.04	KNW-37	1184.13	145.84	KNW-9	61.66	5.66	KNW-37	853.92	83.46	KNW-37	35.73	4.12	KNW-21	147.94	15.22	KNW-8	26.74	2.86	KNW-8	5.24458	0.392082	KNW-6	19	2.06	KNW-27	547.54	71.78
		KNW-9	6113.21	387.38	KNW-9	1747.73	133.36	KNW-40	1191.06	150.56	KNW-12	62.75	5.84	KNW-23	877.31	75.32	KNW-36	36.35	4.24	KNW-39	159.17	20.14	KNW-35	26.83	4.22	KNW-1	5.29336	0.395618	KNW-4	19.21	1.76	KNW-4	552.45	66.5
		KNW-10	6164.59	390.58	KNW-39	1751.28	454.66	KNW-39	1199.56	150.32	KNW-10	63.8	5.8	KNW-36	906.57	88.12	KNW-23	37.63	3.78	KNW-22	159.93	16.58	KNW-30	27.06	3.9	KNW-7	5.32264	0.40088	KNW-7	19.4	1.8	KNW-20	554.42	69.12
		KNW-14	6164.71	539.3	KNW-27	1757.29	152.7	KNW-2	1200.15	102.86	KNW-20	65	5.9	KNW-27	931.43	81.9	KNW-10	41.18	3.58	KNW-2	162.04	13.9	KNW-27	27.11	5.24	KNW-37	5.3361	0.4539	KNW-23	19.64	2.22	KNW-7	558.04	64.82
		KNW-26	6172	470.98	KNW-14	1758.8	136.88	KNW-26	1203.58	128.04	KNW-12	65.3	4.96	KNW-28	957.13	84.7	KNW-2	41.49	3.54	KNW-38	163.07	20.46	KNW-6	27.14	2.86	KNW-2	5.34533	0.42458	KNW-8	19.75	1.82	KNW-18	558.38	68.76
		KNW-25	6173.63	468.8	KNW-28	1759.31	192.2	KNW-27	1212.72	130.1	KNW-10	67.16	5.06	KNW-24	971.54	83.86	KNW-38	41.49	4.78	KNW-40	165.51	21.12	KNW-37	27.22	4.38	KNW-10	5.34703	0.400438	KNW-14	20.11	1.92	KNW-3	568	64.76
		KNW-18	6185.7	550.94	KNW-8	1762.2	132.96	KNW-32	1213.55	143.08	KNW-21	68.48	5.46	KNW-39	1000.04	99	KNW-1	41.56	3.54	KNW-1	167.63	14.34	KNW-4	27.25	2.86	KNW-33	5.35799	0.4535	KNW-2	20.12	2.08	KNW-17	572.08	70.5
		KNW-10	6207.25	436.12	KNW-32	1762.46	423.14	KNW-3	1213.81	104.26	KNW-13	68.64	6.34	KNW-2	1004.81	75.5	KNW-27	41.8	4.26	KNW-24	168.45	13.72	KNW-10	27.26	3	KNW-14	5.36201	0.4057	KNW-4	20.12	2.14	KNW-13	579.6	72.58
		KNW-22	6216.14	394.62	KNW-30	1765.23	156.68	KNW-23	1220.48	126.64	KNW-14	69.81	6.48	KNW-10	1014.72	77.52	KNW-24	41.82	4.2	KNW-35	168.8	20.62	KNW-11	27.26	3.02	KNW-11	5.37125	0.4057	KNW-7	20.16	2.14	KNW-19	582.65	72.06
		KNW-20	6216.73	455.54	KNW-15	1769.07	138.3	KNW-29	1221.05	133.22	KNW-24	69.83	5.66	KNW-38	1016.5	99.96	KNW-28	42.54	4.38	KNW-34	170.3	20.62	KNW-5	27.31	2.88	KNW-6	5.38261	0.396902	KNW-1	20.2	2.1	KNW-12	584.41	72.28
		KNW-21	6221.3	457.74	KNW-25	1769.46	367.02	KNW-28	1221.76	132.18	KNW-25	70.37	5.82	KNW-40	1019.18	101.58	KNW-11	42.72	3.84	KNW-25	171.35	18.24	KNW-32	27.41	4.04	KNW-32	5.40057	0.44426	KNW-37	20.23	2.34	KNW-5	603.96	68.68
		KNW-3	6236.02	519.06	KNW-40	1775.49	466.02	KNW-25	1222.67	129.06	KNW-27	71.14	5.96	KNW-25	1025.64	89.2	KNW-7	42.76	3.68	KNW-32	171.44	20.4	KNW-14	27.51	3.14	KNW-39	5.4345	0.46836	KNW-40	20.42	2.44	KNW-6	605.52	69.46
		KNW-6	6239.2	395.16	KNW-16	1775.51	311.28	KNW-1	1224.98	104.78	KNW-8	71.22	5.28	KNW-7	1028.16	77.94	KNW-39	43.03	5	KNW-26	173.5	18.6	KNW-26	27.58	5.26	KNW-5	5.50222	0.406542	KNW-24	20.45	2.22	KNW-2	605.66	68.28
		KNW-23	6252.36	396.66	KNW-12	1776.04	137.12	KNW-35	1225.24	148.3	KNW-22	71.44	5.72	KNW-1	1030.52	77.32	KNW-40	43.27	5.06	KNW-33	174.82	20.98	KNW-31	27.62	4.02	KNW-4	5.50402	0.40349	KNW-16	20.48	1.96	KNW-34	605.84	83.08
		KNW-32	6252.89	492.2	KNW-26	1776.08	371.76	KNW-34	1233.66	148.02	KNW-14	71.46	5.44	KNW-35	1031.45	99.38	KNW-26	43.43	4.4	KNW-23	175.15	14.16	KNW-3	27.72	2.9	KNW-34	5.5522	0.47278	KNW-1	20.62	1.88	KNW-10	610.25	70.82
		KNW-16	6260.86	552.5	KNW-22	1780.14	185.82	KNW-30	1239.11	136.34	KNW-37	71.66	6.54	KNW-3	1033.72	77.74	KNW-4	43.64	3.74	KNW-10	175.27	15.42	KNW-12	27.76	3.1	KNW-12	5.55281	0.41534	KNW-38	20.68	2.42	KNW-37	619.84	87.56
		KNW-22	6262.09	587.9	KNW-40	1782.04	175.08	KNW-31	1240.78	145.04	KNW-20	71.95	5.72	KNW-26	1033.92	90.32	KNW-32	43.77	4.82	KNW-4	175.31	15.1	KNW-29	27.78	5.5	KNW-38	5.55381	0.4776	KNW-34	20.73	2.38	KNW-10	634.24	111.5
		KNW-14	6267.66	445.04	KNW-37	1783.31	170.88	KNW-7	1241.63	107.92	KNW-4	72.38	6.46	KNW-4	1036.72	78.14	KNW-35	43.85	4.96	KNW-22	175.39	14.1	KNW-9	27.78	3.04	KNW-3	5.57029	0.41052	KNW-8	20.92	2.2	KNW-22	636.67	87.32
		KNW-8	6269.25	526.8	KNW-7	1787.97	134.68	KNW-37	1243.47	82.06	KNW-23	72.41	5.82	KNW-6	1038.1	78.52	KNW-29	43.95	4.54	KNW-30	176.16	19.54	KNW-28	27.79	5.42	KNW-29	5.57409	0.44908	KNW-5	20.92	1.88	KNW-28	645.32	83.26
		KNW-39	6269.36	681.22	KNW-6	1789.53	134.28	KNW-24	1246.64	130.42	KNW-40	72.68	6.8	KNW-30	1049.49	94	KNW-8	43.96	3.76	KNW-11	176.42	16.12	KNW-7	27.81	2.96	KNW-35	5.63233	0.4776	KNW-11	20.95	1.96	KNW-14	662.94	78.26
		KNW-9	6271.48	439.62	KNW-39	1789.83	174.36	KNW-40	1248.15	82.8	KNW-5	73.07	5.38	KNW-9	1053.81	80.3	KNW-9	44.02	3.82	KNW-3	176.84	15.2	KNW-13	27.93	3.14	KNW-15	5.64219	0.42498	KNW-20	21.08	2.1	KNW-36	665.89	96.4
		KNW-26	6273.34	603.02	KNW-26	1790.24	154.44	KNW-20	1252.11	121.12	KNW-3	73.12	6.48	KNW-5	1055.6	79.68	KNW-34	44.14	4.94	KNW-12	178.82	16.44	KNW-29	27.99	3.98	KNW-13	5.64419	0.42498	KNW-3	21.15	2.28	KNW-9	666.8	75.18
		KNW-32	6274.76	650.74	KNW-37	1793.26	455.48	KNW-22	1254.95	129.16	KNW-39	73.16	6.78	KNW-11	1056.63	82.72	KNW-25	44.31	4.54	KNW-31	180.09	21.24	KNW-15	28.18	3.24	KNW-36	5.69901	0.48724	KNW-32	21.16	2.3	KNW-35	669.15	90.54
		KNW-15	6284.04	552.12	KNW-6	1795.22	275.94	KNW-10	1256.42	110.48	KNW-2	73.2	5.48	KNW-29	1057.72	94.14	KNW-3	44.34	3.76	KNW-24	180.41	19.02	KNW-39	28.19	4.62	KNW-28	5.71204	0.458278	KNW-15	21.3	2.02	KNW-33	669.26	90.54
		KNW-10	6286.02	530.92	KNW-22	1795.63	147.98	KNW-33	1258.01	149.64	KNW-28	73.23	6.16	KNW-32	1058.81	99.94	KNW-31	44.44	4.86	KNW-27	180.67	19.54	KNW-1	28.3	2.96	KNW-31	5.73797	0.46836	KNW-35	21.38	2.44	KNW-8	671.98	73.52
		KNW-25	6291.74	601.38	KNW-5	1796.15	134.52	KNW-5	1259.53	108.76	KNW-35	73.34	7.56	KNW-34	1065.33	101.92	KNW-6	44.7	3.82	KNW-20	182.41	17.74	KNW-25	28.31	5.32	KNW-29	5.82184	0.448638	KNW-30	21.4	2.28	KNW-21	678.33	84.12
		KNW-8	6298.58	438.16	KNW-32	1797.21	161.88	KNW-21	1261.33	128.8	KNW-4	73.4	5.4	KNW-33	1066.11	101.32	KNW-20	44.82	4.18	KNW-20	184.23	12.44	KNW-36	28.32	4.5	KNW-27	5.84141	0.46354	KNW-5	21.44	2.26	KNW-10	680.35	83.78
		KNW-29	6299.32	488.04	KNW-22	1797.86	359.3	KNW-33	1263.81	82.86	KNW-17	73.4	5.74	KNW-25	1068.92	82.6	KNW-33	44.96	5	KNW-9	186.24	16.32	KNW-1	28.33	3.72	KNW-28	5.84463	0.450806	KNW-27	21.47	2.26	KNW-22	683.52	84.18
		KNW-2	6299.52	523.68	KNW-25	1797.93	154.04	KNW-8	1265.8	110.4	KNW-34	73.42	6.58	KNW-31	1070	100.34	KNW-30	45.08	4.68	KNW-6	188.84	16.36	KNW-30	28.35	5.68	KNW-16	5.87034	0.44386	KNW-26	21.54	2.24	KNW-29	684.73	87.2
		KNW-24	6299.73	399.5	KNW-36	1798.27	171.08	KNW-17	1266.32	119.9	KNW-13	73.64	5.58	KNW-8	1071.35	81.36	KNW-12	45.22	4.06	KNW-29	189.22	20.82	KNW-2	28.46	3	KNW-7	5.88726	0.428474	KNW-6	21.56	1.94	KNW-13	689.22	88.88
		KNW-37	6300.06	518.84	KNW-31	1800.14	427.42	KNW-16	1273.6	119.78	KNW-8	73.77	6.56	KNW-20	1080.67	88.12	KNW-5	45.32	3.86	KNW-7	189.89	16.5	KNW-34	28.7	4.46	KNW-1	5.9021	0.427148	KNW-2	21.6	2.14	KNW-23	693.55	86.08
		KNW-19	6304.11	460.12	KNW-38	1800.5	462.32	KNW-4	1274.74	109.78	KNW-29	73.77	6.24	KNW-12	1090.18	77.34	KNW-12	46.05	3.72	KNW-5	190.47	16.44	KNW-28	28.73	4.04	KNW-26	5.92999	0.4539	KNW-28	21.72	2.3	KNW-25	696.27	91
		KNW-24	6306.91	599.06	KNW-12	1800.6	166.86	KNW-9	1276.28	80.7	KNW-9	73.85	5.52	KNW-24	1104.25	83.52	KNW-25	46.2	4.12	KNW-13	193.78	17.94	KNW-9	29.2	4.02	KNW-2	6.00879	0.433294	KNW-33	21.78	2.46	KNW-38	697.62	95.3
		KNW-21	6309.71	589.1	KNW-15	1800.73	312.6	KNW-15	1278.83	119.48	KNW-16	73.94	5.68	KNW-12	1106.49	86.94	KNW-22	46.63	4.02	KNW-23	194.85	20.36	KNW-2	29.26	3.86	KNW-27	6.06198	0.472738	KNW-13	21.81	2.04	KNW-39	709.87	97.38
		KNW-34	6313.65	663.5	KNW-3	1801.07	272.74	KNW-12	1279.23	117.28	KNW-11	74.03	5.58	KNW-9	1110.17	78.06	KNW-33	47.09	4.54	KNW-14	195.51	18.2	KNW-16	29.44	4.62	KNW-25	6.08523	0.46836	KNW-21	21.91	2.42	KNW-20	722.04	91.38
		KNW-31	6313.87	650.54	KNW-7	1801.3	278.42	KNW-3	1279.61	82.06	KNW-3	74.11	5.44	KNW-40	1110.43	95.72	KNW-20	47.1	4.18	KNW-28	195.78	21.34	KNW-3	29.46	3.9	KNW-16	6.11054	0.447754	KNW-19	21.94	2.3	KNW-19	745.9	93.96
		KNW-17	6317.94	400.34	KNW-11	1801.88	138.46	KNW-36	1282.47	84.5	KNW-15	74.15	5.66	KNW-27	1113.67	87.02	KNW-1	47.64	3.7	KNW-8	199.94	17.44	KNW-7	29.46	3.98	KNW-17	6.11172	0.46836	KNW-14	22.08	2.66	KNW-11	747.19	88.72
		KNW-5	6323.65	400.58	KNW-21	1804.37	184.86	KNW-28	1283.93	89.58	KNW-26	74.33	6.18	KNW-37	1116.63	94.4	KNW-27	47.7	4.32	KNW-19	211.28	20.38	KNW-21	29.51	5.26	KNW-30	6.12601	0.47097	KNW-39	22.17	2.6	KNW-24	750.36	91.8
		KNW-29	6330.58	619.78	KNW-30	1804.5	395.42	KNW-27	1284.55	83.1	KNW-1	74.35	5.46	KNW-29	1116.85	88.28	KNW-37	47.93	4.74	KNW-25	214.17	17.88	KNW-4	29.54	3.92	KNW-17	6.15795	0.452574	KNW-14	22.19	2.24	KNW-15	750.9	87.14
		KNW-29	6334.72	401.8	KNW-5	1809.03	276.56	KNW-14	1287.74	119.54	KNW-6	74.43	5.48	KNW-20	1120.77	70.5	KNW-14	48.13	4.36	KNW-15	222.8	20.88	KNW-12	29.62	4.42	KNW-21	6.19448	0.47318	KNW-28	22.19	2.34	KNW-24	759.6	94.38
		KNW-14	6335.36	401.32	KNW-2	1809.04	153.04	KNW-31	1288.35	83.82	KNW-7	74.44	5.52	KNW-23	1122.44	84.46	KNW-9	48.14	3.82	KNW-16	225.41	21.26	KNW-38	29.64	4.82	KNW-8	6.1949	0.44908	KNW-25	22.21	2.38	KNW-31	767.53	100.3
		KNW-7	6338.76	531.46	KNW-18	1809.75	323.86	KNW-2	1288.82	82.46	KNW-31	74.63	6.42	KNW-22	1124.21	84.16	KNW-24	48.16	4.18	KNW-17	226.9	21.56	KNW-13	29.86	4.5	KNW-22	6.31519	0.6688	KNW-30	22.25	2.34	KNW-23	795.54	128.66
		KNW-7	6341.39	401.66	KNW-19	1810	327.36	KNW-21	1290.16	87.68	KNW-32	74.65	6.46	KNW-5	1124.79	78	KNW-13	48.28	4.34	KNW-18	226.98	21.72	KNW-27	29.89	4.16	KNW-15	6.33456	0.461772	KNW-29	22.27	2.36	KNW-20	808.66	114.1
		KNW-18	6357.89	462.24	KNW-36	1810.04	455.36	KNW-18	1290.58	123.06	KNW-2	74.67	6.64	KNW-3	1124.92	77.84	KNW-3	48.42	3.76	KNW-2	235.59	15.18	KNW-17	30.24	4.82	KNW-3	6.39033	0.462656	KNW-27	22.37	2.48	KNW-12	810.21	93.52
		KNW-20	6359.13	571.9	KNW-4	1810.17	275.54	KNW-30	1291.6	83.9	KNW-33	74.73	6.64	KNW-33	1128.46	93.06	KNW-36	48.47	4.78	KNW-1	235.69	17.08	KNW-15	30.29	4.7	KNW-4	6.42987	0.46354	KNW-26	22.41	2.4	KNW-30	814.99	101.06
		KNW-17	6361.93	460.8	KNW-4	1811.8	135.44	KNW-6	1291.8	111.88	KNW-18	74.83	6.64	KNW-1	1130.49	78.14	KNW-8	48.51	3.8	KNW-3	236.67	17.18	KNW-16	30.29	3.5	KNW-11	6.4372	0.472738	KNW-31	22.42	2.42	KNW-40	823.12	110.46
		KNW-12	6362.67	403.52	KNW-26	1812.67	194.18	KNW-4	1291.95	82.86	KNW-21	75.05	7	KNW-26	1134.05	88.12	KNW-23	48.59	4.2	KNW-4	240.11	17.44	KNW-14	30.47	4.66	KNW-13	6.49685	0.472296	KNW-9	22.52	2.04	KNW-15	832.67	94.44
		KNW-4	6365.88	530.72	KNW-16	1812.93	142.34	KNW-2	1292.18	81.58	KNW-23	75.06	7.2	KNW-11	1134.19	80.2	KNW-17	48.78	4.08	KNW-2	241.55	17.58	KNW-11	30.63	4.52	KNW-18	6.55117	0.49688	KNW-11	22.59	2.38	KNW-25	853.92	97.5
		KNW-7	6367.85	442.3	KNW-4	1815.57	155.52	KNW-3	1294.33	81.62	KNW-13	75.21	6.54	KNW-28	1134.95	89.2	KNW-19	48.84	4.52	KNW-1	241.7	15.56	KNW-10	30.84	4.28	KNW-6	6.63736	0.478	KNW-13	22.87	2.74	KNW-14	874.67	94.8
		KNW-30	6368.6	627.38	KNW-8	1815.71	157.56	KNW-29	1295.52	84.04	KNW-1	75.22	6.64	KNW-8	1141.17	79.52	KNW-5	48.98	3.8	KNW-11	242.15	18.08	KNW-17	30.88	3.72	KNW-12	6.68553	0.49688	KNW-12	22.92	2.52	KNW-26	886.23	101.12
		KNW-19	6373.27	403.94	KNW-28	1818.15	389.42	KNW-17	1300.34	82.88	KNW-38	75.28	6.92	KNW-4	1141.48	79.06	KNW-4	49	3.8	KNW-14	242.44	18.32	KNW-8	31.16	4.24	KNW-26	6.71264	0.5258	KNW-22	22.98	2.58	KNW-21	887.41	104.32
		KNW-26	6373.44	404.3	KNW-2	1818.36	274.44	KNW-18	1301.9	86.38	KNW-21	75.35	7.22	KNW-32	1142.48	91.92	KNW-29	49.04	4.48	KNW-40	247.21	23.48	KNW-6	31.32	4.2	KNW-24	6.77873	0.51134	KNW-3	23.09	2.06	KNW-16	889.48	99.54
		KNW-35	6381.63	675.14	KNW-29	1818.49	393.98	KNW-28	1302.52	84.38	KNW-7	75.53	6.56	KNW-36	1145.91	96.28	KNW-2	49.06	4.06	KNW-5	249.22	18.14	KNW-22	32.46	2.52	KNW-19	6.77952	0.67362	KNW-13	23.21	2.32	KNW-11	916.72	100.14
		KNW-25	6382.6	404.86	KNW-24	1819.92	190.56	KNW-8	1303.09	82.28	KNW-29	75.58	7.4	KNW-2	1145.99	79.38	KNW-40	49.18	4.98	KNW-21	251.34	20.04	KNW-18	32.49	5.24	KNW-5	6.93919	0.49728	KNW-15	23.21	2.36	KNW-22	920.54	149.68
		KNW-37	6385.07	684.56	KNW-3	1820	135.86	KNW-19	1305.09	125.32	KNW-28	75.6	7.38	KNW-14	1148.09	81.98	KNW-14	49.19	3.98	KNW-9	253.75	18.8	KNW-24	32.62	6.04	KNW-14	6.9434	0.6692	KNW-29	23.21	2.42	KNW-24	925.44	127.72
		KNW-1	6388.54	441.1	KNW-21	1820.13	149.08	KNW-5	1305.69	82.36	KNW-22	75.68	7.2	KNW-30	1148.18	91.28	KNW-11	49.22	3.92	KNW-10	254.17	18.9	KNW-22	32.76	5.92	KNW-24	6.95587	0.7407	KNW-16	23.4	2.34	KNW-5	938.58	135
		KNW-12	6388.85	554.34	KNW-1	1821.05	135.66	KNW-25	1307.04	84.34	KNW-20	75.72	7.04	KNW-13	1148.19	90.58	KNW-19	49.23	4.16	KNW-23	258.79	17.86	KNW-26	32.93	4.54	KNW-17	6.9651	0.67844	KNW-15	23.96	2.9	KNW-17	948.79	105.02
		KNW-38	6389.35	689.62	KNW-34	1821.19	170.58	KNW-6	1307.09	83.98	KNW-34	75.73	7.72	KNW-18	1149.92	84.46	KNW-10	49.26	3.92	KNW-12	258.94	19.4	KNW-5	33.1	4.42	KNW-19	6.99267	0.53424	KNW-18	24.18	2.44	KNW-19	951.88	133.3
		KNW-1	6394.02	404.82	KNW-10	1821.26	287.02	KNW-14	1307.13	82.92	KNW-2	75.74	6.44	KNW-31	1150.77	92.04	KNW-26	49.29	4.42	KNW-8	259.2	18.98	KNW-23	33.11	6.06	KNW-23	7.02574	0.54026	KNW-36	24.34	2.78	KNW-9	954.89	96.34
		KNW-3	6396.84	405.24	KNW-1	1821.96	154.12	KNW-9	1308.31	114.58	KNW-23	75.99	7.08	KNW-10	1152.63	81.26	KNW-31	49.38	4.6	KNW-20	259.54	20.58	KNW-18	33.72	4.1	KNW-22	7.07335	0.54026	KNW-16	24.69	2.98	KNW-28	955.66	105.18
		KNW-33	6403.74	515.36	KNW-23	1823.71	190.16	KNW-11	1308.97	119.3	KNW-9	76.03	6.82	KNW-17	1154.51	84.42	KNW-39	49.41	4.96	KNW-17	259.68	17.3	KNW-17	33.85	2.52	KNW-23	7.11552	0.54026	KNW-17	25.47	3.08	KNW-27	970.76	103.28
		KNW-16	6404.85	457.56	KNW-8	1824.4	283.52	KNW-10	1309	82.82	KNW-25	76.03	7.54	KNW-16	1154.81	83.06	KNW-28	49.46	4.5	KNW-17	261.13	20.34	KNW-19	33.91	4.18	KNW-10	7.12474	0.50894	KNW-18	26.3	3.2	KNW-21	973.08	141.64
		KNW-13	6407.3	558.18	KNW-7	1824.53	157.92	KNW-26	1310.82	90.72	KNW-26	76.09	7.08	KNW-2	1158.41	72.12	KNW-34	49.75	4.84	KNW-27	261.79	22.14	KNW-19	33.93	2.54	KNW-9	7.13215	0.51376	KNW-25	26.81	2.72	KNW-3	977.57	136.38
		KNW-13	6409.33	453.8	KNW-35	1824.88	453.3	KNW-19	1316.37	84.08	KNW-30	76.1	6.48	KNW-39	1162.67	99.56	KNW-32	49.8	4.64	KNW-26	263.32	22.12	KNW-19	34.57	5.66	KNW-25	7.26094	0.56396	KNW-10	27.33	2.46	KNW-6	985.04	96.66
		KNW-23	6410.85	475.72	KNW-18	1826.37	147.14	KNW-12	1316.92	86.24	KNW-22	76.12	7.24	KNW-34	1163.14	96.52	KNW-35	50.12	4.9	KNW-24	263.75	18.24	KNW-16	34.78	2.58	KNW-14	7.31005	0.5242	KNW-12	27.34	3.2	KNW-2	997.29	97.84
		KNW-33	6419.48	670.18	KNW-24	1826.39	152.42	KNW-13	1317.27	86.24	KNW-37	76.13	7.9	KNW-19	1163.16	85.84	KNW-28	50.18	4.72	KNW-18	264.58	17.68	KNW-14	34.87	2.56	KNW-15	7.31575	0.70736	KNW-17	27.43	2.68	KNW-4	1001.39	134
		KNW-1	6419.62	533.02	KNW-17	1827.07	146.4	KNW-13	1318.68	121.64	KNW-26	76.18	7.36	KNW-35	1163.36	97.14	KNW-15	50.49	4.1	KNW-26	265.52	18.52	KNW-23	35.63	4.58	KNW-16	7.49169	0.72182	KNW-19	28.04	3.42	KNW-18	1022.49	135.42
		KNW-3	6420.93	443.92	KNW-27	1827.5	386.84	KNW-16	1319.73	83.84	KNW-33	76.18	7.76	KNW-23	1171.89	74.3	KNW-18	50.54	4.24	KNW-16	265.62	20.26	KNW-23	35.68	2.78	KNW-13	7.49431	0.7166	KNW-10	29.87	3.28	KNW-9	1026.03	140.06
		KNW-6	6425.07	537.58	KNW-31	1827.83	163.46	KNW-32	1321.1	86.06	KNW-19	76.24	6.02	KNW-14	1172.36	92.88	KNW-6	50.88	4.26	KNW-28	265.89	22.64	KNW-18	35.73	2.66	KNW-19	7.50978	0.54508	KNW-9	31.48	3.46	KNW-3	1041.33	97.76
		KNW-28	6426.59	625.3	KNW-29	1828.04	160.98	KNW-14	1321.25	86.7	KNW-5	76.27	6.78	KNW-7	1173.15	81.6	KNW-16	50.88	4.16	KNW-7	266.33	17.22	KNW-24	36.1	2.84	KNW-4	7.51158	0.6692	KNW-19	31.5	3	KNW-7	1043.96	139.64
		KNW-5	6427.95	445.3	KNW-33	1828.12	169.84	KNW-23	1321.67	90.46	KNW-6	76.34	6.78	KNW-26	1176.78	74.74	KNW-7	50.9	4	KNW-33	266.42	24.04	KNW-15	36.57	2.7	KNW-12	7.54131	0.7166	KNW-20	32.48	3.96	KNW-17	1047.03	136.98
		KNW-11	6431.45	452.96	KNW-12	1829.09	308.36	KNW-1	1323.77	84.66	KNW-28	76.34	7.12	KNW-19	1178.22	95.54	KNW-38	51.01	5.08	KNW-13	266.95	20.08	KNW-25	36.67	4.98	KNW-22	7.55095	0.5736	KNW-21	32.74	4.26	KNW-8	1052.36	140.7
		KNW-11	6436.44	556.3	KNW-18	1829.11	173.94	KNW-11	1324.06	83.82	KNW-39	76.36	7.94	KNW-6	1183.72	73.82	KNW-26	51.04	4.76	KNW-29	267.28	22.92	KNW-10	36.76	2.62	KNW-40	7.57484	0.95158	KNW-7	33.56	3.62	KNW-28	1053.87	142.6
		KNW-13	6445.94	408.28	KNW-25	1831.52	194.12	KNW-22	1324.18	90.4	KNW-3	76.44	6.72	KNW-6	1184.59	82.26	KNW-29	51.14	4.8	KNW-28	268.33	18.84	KNW-9	37.39	2.66	KNW-18	7.64553	0.74592	KNW-37	34.37	5.44	KNW-2	1058.63	136.96
		KNW-9	6447.73	543.18	KNW-2	1832.44	137.92	KNW-26	1325.89	85.66	KNW-18	76.54	6	KNW-15	1188.13	85.14	KNW-23	51.15	4.74	KNW-39	268.36	25.28	KNW-12	37.47	2.74	KNW-8	7.75761	0.69772	KNW-22	34.74	4.52	KNW-4	1075.79	101.34
		KNW-30	6453.77	409.32	KNW-15	1832.85	169.56	KNW-18	1327.04	84.66	KNW-30	76.68	7.5	KNW-21	1194.19	88.94	KNW-21	51.26	4.72	KNW-37	269.39	25.02	KNW-11	37.49	2.74	KNW-5	7.75781	0.6929	KNW-11	34.91	3.98	KNW-18	1077.03	116.34
		KNW-23	6465.44	610.54	KNW-23	1834.13	370.84	KNW-39	1328.97	88	KNW-16	76.74	7.06	KNW-19	1197.81	75.32	KNW-30	51.34	4.72	KNW-18	269.94	21.16	KNW-7	37.69	2.68	KNW-6	7.78412	0.69772	KNW-36	36.99	5.86	KNW-38	1081.12	128.34
		KNW-16	6472.63	410	KNW-23	1835.09	152.16	KNW-34	1330.55	87.38	KNW-35	76.74	6.92	KNW-20	1200.03	88.96	KNW-18	51.45	4.72	KNW-32	270.57	23.7	KNW-13	37.72	2.76	KNW-23	7.8041	0.82908	KNW-9	37.01	3.36	KNW-5	1081.51	100.44
		KNW-28	6474.76	499.06	KNW-10	1835.91	161.38	KNW-1	1330.78	83.92	KNW-27	76.8	7.42	KNW-22	1200.3	76.22	KNW-1	51.6	4.26	KNW-31	271.96	23.66	KNW-6	37.8	2.68	KNW-2	7.81365	0.6929	KNW-6	37.04	3.94	KNW-1	1096.23	140.3
		KNW-4	6479.54	410.34	KNW-29	1838.51	202.12	KNW-27	1332.89	92.7	KNW-24	76.87	7.38	KNW-13	1201.23	85.48	KNW-17	51.63	4.7	KNW-12	272.15	17.96	KNW-4	38.04	2.7	KNW-21	7.8701	0.59248	KNW-2	38.75	4.08	KNW-26	1101.3	146.02
		KNW-6	6483.94	449.72	KNW-14	1840.04	169.04	KNW-15	1334.19	84.68	KNW-38	76.87	7.98	KNW-3	1202.44	75.06	KNW-4	51.69	4.32	KNW-30	272.23	23.52	KNW-8	38.06	2.7	KNW-38	7.87591	0.97488	KNW-8	39.26	4.18	KNW-15	1109.1	137.68
		KNW-20	6486.11	410.96	KNW-3	1840.43	158.06	KNW-15	1334.54	87.78	KNW-27	77.06	7.3	KNW-28	1203.22	76.48	KNW-20	51.78	4.38	KNW-7	272.45	19.9	KNW-5	38.2	2.7	KNW-7	7.94298	0.71218	KNW-29	39.97	5.52	KNW-1	1115.57	105.52
		KNW-28	6486.75	411.42	KNW-27	1841.88	200.26	KNW-24	1334.78	91.62	KNW-15	77.25	7.1	KNW-14	1209.81	75.72	KNW-21	51.82	4.4	KNW-6	272.84	19.88	KNW-24	38.63	5.02	KNW-20	8.06632	0.57842	KNW-24	41.73	5.5	KNW-16	1135.35	140.88
		KNW-8	6510.83	412.32	KNW-11	1842.42	307.76	KNW-30	1335.54	93.92	KNW-19	77.3	6.86	KNW-1	1211.85	75.42	KNW-30	51.84	4.88	KNW-9	273.19	17.74	KNW-40	38.78	3.4	KNW-3	8.07274	0.71178	KNW-1	42.31	4.4	KNW-31	1140.67	121.08
		KNW-15	6513.69	463.9	KNW-14	1842.83	316.66	KNW-4	1335.65	84.24	KNW-4	77.45	6.68	KNW-9	1214.7	75.9	KNW-9	51.9	4.4	KNW-11	273.65	17.96	KNW-2	38.89	2.74	KNW-20	8.10449	0.80216	KNW-10	44.32	3.82	KNW-37	1150.37	127.1
		KNW-2	6513.7	412.34	KNW-17	1843.92	326.46	KNW-25	1336.46	92.12	KNW-1	77.46	6.6	KNW-10	1215.47	75.92	KNW-22	51.94	4.88	KNW-25	274.07	19.02	KNW-20	39.03	4.86	KNW-28	8.13077	0.88892	KNW-3	44.63	4.64	KNW-26	1173.13	134.94
		KNW-15	6518.44	412.88	KNW-30	1844.85	204.86	KNW-35	1338.84	88.06	KNW-12	77.62	7.06	KNW-12	1216.08	76.42	KNW-15	51.95	4.7	KNW-8	274.16	17.74	KNW-27	39.12	3.12	KNW-27	8.13378	0.87968	KNW-4	44.64	4.68	KNW-30	1183.92	147.8
		KNW-18	6518.88	413.06	KNW-11	1850.86	167.88	KNW-5	1338.99	85.96	KNW-14	77.68	6.72	KNW-7	1218.31	76	KNW-6	52.07	4.04	KNW-19	274.53	21.64	KNW-20	39.22	6.5	KNW-1	8.17276	0.72142	KNW-5	44.68	4.7	KNW-12	1203.4	159.64
		KNW-21	6521.49	413.64	KNW-35	1851.48	174.7	KNW-17	1339.64	88.62	KNW-31	77.73	7.82	KNW-24	1219.31	77.18	KNW-8	52.13	4.36	KNW-36	274.87	25.34	KNW-20	39.32	2.96	KNW-9	8.26362	0.74834	KNW-22	45	4.24	KNW-1	1218.82	118.84
		KNW-27	6528.46	414.3	KNW-20	1851.72	178.76	KNW-16	1339.68	88.34	KNW-30	77.73	7.24	KNW-18	1221.14	98.52	KNW-19	52.23	4.6	KNW-34	275.05	25	KNW-38	39.5	3.42	KNW-30	8.27798	0.91784	KNW-21	45.17	4.22	KNW-6	1231.55	149.18
		KNW-30	6535.2	508.96	KNW-20	1854.26	338.88	KNW-20	1341.76	89.52	KNW-15	77.77	6.72	KNW-29	1222.69	77.74	KNW-3	52.36	4.4	KNW-19	276	18.5	KNW-21	39.58	4.98	KNW-26	8.31313	0.89374	KNW-39	46.47	7.4	KNW-29	1265.78	123.54
		KNW-19	6548.52	586.04	KNW-6	1855.81	159.54	KNW-6	1341.8	84.66	KNW-40	77.79	8.14	KNW-8	1223.41	76.3	KNW-13	52.42	4.2	KNW-15	276.86	21.02	KNW-22	40.01	5.08	KNW-20	8.31422	0.62944	KNW-20	47.17	4	KNW-32	1311.45	133.08
		KNW-31	6551.25	512.92	KNW-17	1856.03	174.92	KNW-29	1342.07	93.98	KNW-36	77.79	7.06	KNW-27	1223.51	77.86	KNW-10	52.43	4.42	KNW-10	278.33	18.08	KNW-1	40.19	2.84	KNW-24	8.33205	0.63506	KNW-38	47.19	7.46	KNW-8	1320.21	116.42
		KNW-36	6557.67	698.54	KNW-9	1862.56	163.06	KNW-8	1342.24	86.44	KNW-11	77.86	6.84	KNW-25	1223.78	77.6	KNW-18	52.47	4.56	KNW-38	279.25	26.12	KNW-3	40.26	2.84	KNW-39	8.35371	1.04196	KNW-23	47.73	6.2	KNW-25	1329.83	164.88
		KNW-36	6570.69	537.98	KNW-13	1865.19	317.42	KNW-9	1343.05	86.68	KNW-6	77.94	6.7	KNW-4	1224.2	76.3	KNW-11	52.53	4.5	KNW-27	280.06	19.62	KNW-28	40.41	3.22	KNW-10	8.40041	0.75758	KNW-24	47.78	4.56	KNW-35	1448.23	149.06
		KNW-11	6571.67	416.4	KNW-9	1865.61	292.1	KNW-11	1343.38	87.62	KNW-16	78.17	6.78	KNW-18	1224.94	76.88	KNW-24	52.61	4.82	KNW-29	281.22	19.8	KNW-26	41.61	3.3	KNW-31	8.51659	0.99416	KNW-25	47.92	6.42	KNW-33	1475.42	149.18
		KNW-24	6596.39	491.66	KNW-38	1868.15	180.5	KNW-7	1345.15	86.52	KNW-7	78.18	6.96	KNW-17	1228.45	98.62	KNW-16	52.74	4.78	KNW-30	281.41	19.9	KNW-30	41.62	3.36	KNW-29	8.5455	0.93712	KNW-23	49.44	4.68	KNW-30	1540.01	146.26
		KNW-12	6602.54	466.22	KNW-28	1868.35	163.4	KNW-7	1345.87	84.96	KNW-8	78.19	6.72	KNW-30	1229.24	78.2	KNW-2	52.74	4.24	KNW-14	283.04	18.66	KNW-21	41.99	3.24	KNW-35	8.54952	1.03272	KNW-30	49.57	6.84	KNW-11	1583.45	176.22
		KNW-5	6610.65	552.04	KNW-19	1879.01	152.22	KNW-24	1346.84	86.48	KNW-32	78.44	7.88	KNW-13	1229.98	76.92	KNW-14	52.98	4.5	KNW-4	283.38	18.26	KNW-25	42.54	3.36	KNW-25	8.82806	0.95158	KNW-26	49.71	6.62	KNW-14	1680.71	176.52
		KNW-27	6613.14	639.5	KNW-20	1883.9	153.46	KNW-13	1353.7	85.8	KNW-17	78.45	6.86	KNW-11	1231.18	77.08	KNW-17	53.02	4.58	KNW-6	283.38	18.28	KNW-35	42.72	3.64	KNW-34	8.83873	1.05642	KNW-31	51.51	7.6	KNW-29	1703.98	189.02
		KNW-4	6652.68	460.36	KNW-5	1887.64	162.2	KNW-38	1354.37	89.52	KNW-36	78.5	8.28	KNW-16	1235.74	98.74	KNW-25	53.08	4.9	KNW-35	283.82	25.98	KNW-39	42.89	3.74	KNW-32	8.85581	1.04196	KNW-34	52.69	7.98	KNW-7	1810.46	146.74
		KNW-35	6655.75	541.8	KNW-24	1898.98	388.34	KNW-20	1362.13	87.08	KNW-24	78.67	7.2	KNW-17	1238.59	77.68	KNW-13	53.11	4.5	KNW-13	287.34	18.9	KNW-31	43.19	3.62	KNW-33	9.25529	1.099	KNW-32	52.86	7.86	KNW-23	1912.38	165.4
		KNW-40	6698.94	732.8	KNW-1	1900.13	285.5	KNW-23	1366.82	87.66	KNW-25	78.72	7.28	KNW-16	1240.07	77.64	KNW-16	53.14	4.54	KNW-3	291.66	18.8	KNW-29	43.8	3.52	KNW-21	9.32987	0.96806	KNW-35	53.69	8.22	KNW-40	2636.41	248.3
		KNW-40	6719.08	563.32	KNW-16	1901.35	176.84	KNW-10	1370.95	88.56	KNW-29	79.08	7.32	KNW-15	1246.22	99.14	KNW-5	53.24	4.46	KNW-21	291.76	19.96	KNW-32	44.2	3.72	KNW-36	9.65353	1.18536	KNW-40	53.76	8.62	KNW-34	2700.09	243.6
		KNW-2	6726.21	464.8	KNW-19	1912.5	183.6	KNW-21	1371.12	87.74	KNW-19	79.23	7.32	KNW-15	1258.59	78.76	KNW-15	53.56	4.56	KNW-15	292.37	19.32	KNW-34	44.47	3.78	KNW-37	9.66337	1.18094	KNW-33	53.81	8.08	KNW-13	3413.56	296.98
		KNW-38	6770.7	560.9	KNW-33	1916.31	465.3	KNW-19	1380.54	91.86	KNW-5	79.49	6.9	KNW-5	1266.75	78.98	KNW-7	53.65	4.48	KNW-16	294.48	19.52	KNW-33	45.22	3.82	KNW-18	9.99293	0.71266	KNW-27	62.22	8.3	KNW-39	3659.16	329.84
		KNW-39	6836.64	569.74	KNW-21	1931.52	381.86	KNW-22	1383.35	88.62	KNW-17	79.83	7.32	KNW-38	1340.68	114.06	KNW-27	54.23	5.12	KNW-5	294.55	19	KNW-37	45.22	3.9	KNW-9	16.8269	1.15212	KNW-28	71.72	9.64	KNW-27	4037.91	379.14
		KNW-34	6847.22	554.2	KNW-13	1939.03	176.24	KNW-12	1492.17	94.52	KNW-18	81.4	7.48	KNW-21	1386.16	87.5	KNW-12	56.4	4.92	KNW-22	302.91	20.82	KNW-36	45.54	3.92	KNW-11	24.4316	2.244	KNW-12	207.4	17.22	KNW-36	6950.95	598.6
	IMR-CAGS	KNW-4	6540	200	KNW-2	1711	67	KNW-14	1213	35	KNW-6	69.1	3.1	KNW-14	880	35	KNW-14	37.5	1.8	KNW-14	165.8	5.2	KNW-8	24.1	1	KNW-8	4.45836	0.153061	-	-	-	KNW-5	429	21
		KNW-6	6550	270	KNW-1	1740	61	KNW-13	1230	35	KNW-2	75.8	3	KNW-13	916	42	KNW-13	39.5	2.2	KNW-13	173.2	5.9	KNW-7	25.6	1.3	KNW-9	4.61361	0.180434	-	-	-	KNW-4	466	17
		KNW-2	6570	240	KNW-13	1743	67	KNW-15	1245	47	KNW-1	77.2	3	KNW-15	933	37	KNW-15	40.8	2	KNW-15	173.6	4.9	KNW-9	26.1	1.1	KNW-7	4.64686	0.206281	-	-	-	KNW-11	519	19
		KNW-5	6600	220	KNW-15	1747	66	KNW-6	1250	45	KNW-12	77.4	3.3	KNW-10	1077	38	KNW-10	45.4	1.7	KNW-3	184.2	6.6	KNW-17	26.41	0.93	KNW-17	4.88588	0.199293	-	-	-	KNW-10	539	15
		KNW-3	6730	260	KNW-14	1759	60	KNW-4	1255	37	KNW-8	77.5	2.7	KNW-2	1090	44	KNW-2	45.8	2.4	KNW-10	187.7	4.5	KNW-16	26.5	1.1	KNW-16	4.91552	0.182423	-	-	-	KNW-12	542	27
		KNW-13	6760	160	KNW-9	1763	63	KNW-1	1283	41	KNW-14	77.8	2.7	KNW-6	1097	46	KNW-11	46.3	1.8	KNW-2	190.2	6.7	KNW-12	28.4	1.3	KNW-11	5.0957	0.174972	-	-	-	KNW-13	579	23
		KNW-10	6780	180	KNW-17	1763	59	KNW-3	1286	48	KNW-16	77.8	2.3	KNW-11	1101	41	KNW-6	47.2	2.4	KNW-11	197.7	5.8	KNW-18	28.81	0.82	KNW-12	5.3771	0.25065	-	-	-	KNW-14	613	22
		KNW-1	6800	240	KNW-6	1767	72	KNW-2	1287	49	KNW-11	77.9	2.4	KNW-12	1132	49	KNW-3	47.7	2.3	KNW-12	211.4	6.8	KNW-11	29.06	0.9	KNW-18	5.47474	0.193168	-	-	-	KNW-9	647	21
		KNW-12	6820	260	KNW-16	1776	59	KNW-5	1298	43	KNW-17	78	3.1	KNW-1	1138	37	KNW-12	48.6	2.4	KNW-1	213	6.8	KNW-2	34.2	1.7	KNW-4	6.0635	0.258901	-	-	-	KNW-1	666	31
		KNW-11	6870	280	KNW-4	1781	56	KNW-10	1298	33	KNW-4	78.2	2.7	KNW-3	1139	36	KNW-1	48.7	2.3	KNW-6	220.2	7.8	KNW-4	34.7	1.5	KNW-5	6.16111	0.219015	-	-	-	KNW-2	730	39
		KNW-14	6900	220	KNW-12	1781	78	KNW-11	1302	42	KNW-15	78.2	2.8	KNW-17	1152	45	KNW-17	49.7	2.2	KNW-5	237.8	6.5	KNW-10	34.7	1	KNW-2	6.21053	0.28941	-	-	-	KNW-7	736	33
		KNW-8	6930	250	KNW-10	1783	47	KNW-8	1332	37	KNW-10	78.3	2.2	KNW-4	1161	42	KNW-4	50	2.4	KNW-4	247.6	7.7	KNW-6	34.8	1.7	KNW-1	6.24391	0.285432	-	-	-	KNW-17	737	27
		KNW-15	6970	250	KNW-8	1794	61	KNW-12	1347	46	KNW-13	78.8	3.2	KNW-5	1164	37	KNW-5	50.1	2	KNW-17	249.2	7.4	KNW-1	35.1	1.7	KNW-10	6.27772	0.185738	-	-	-	KNW-6	761	78
		KNW-17	7030	250	KNW-11	1796	66	KNW-7	1349	54	KNW-7	79.2	3.5	KNW-16	1167	38	KNW-16	50.4	2.1	KNW-16	250.2	8.4	KNW-3	35.2	1.7	KNW-3	6.34482	0.245988	-	-	-	KNW-15	785	54
		KNW-18	7090	200	KNW-3	1808	76	KNW-9	1375	41	KNW-9	79.2	3.2	KNW-7	1169	49	KNW-8	50.5	2.4	KNW-18	250.9	8.2	KNW-5	35.9	1.5	KNW-6	6.53856	0.31372	-	-	-	KNW-18	793	33
		KNW-7	7200	290	KNW-18	1818	67	KNW-17	1385	54	KNW-3	79.4	3.1	KNW-8	1186	41	KNW-7	51.5	2.6	KNW-7	288	11	KNW-15	41.7	1.9	KNW-14	7.13518	0.249503	-	-	-	KNW-3	807	38
		KNW-9	7240	230	KNW-7	1821	83	KNW-18	1409	40	KNW-5	79.9	2.3	KNW-18	1196	40	KNW-18	51.5	1.9	KNW-8	291	7.9	KNW-14	42.4	1.5	KNW-15	7.21473	0.2631	-	-	-	KNW-8	900	120
		KNW-16	7320	230	KNW-5	1830	69	KNW-16	1412	48	KNW-18	80.8	2.1	KNW-9	1227	38	KNW-9	53.3	2.3	KNW-9	301	12	KNW-13	42.6	1.9	KNW-13	7.46236	0.33761	-	-	-	KNW-16	1073	83
	CUGB	KNW-14	6564	77	KNW-23	1724	16	KNW-23	1192	14	KNW-10	77.1	1.1	KNW-21	785.2	9.7	KNW-21	32.93	0.86	KNW-21	145.8	1.9	KNW-4	23.74	0.51	KNW-4	5.56444	0.25588	-	-	-	KNW-14	307	11
		KNW-13	6639	75	KNW-18	1739	21	KNW-21	1202	13	KNW-23	77.8	1	KNW-22	937	11	KNW-23	40.32	0.9	KNW-24	171.4	2.6	KNW-3	24.31	0.43	KNW-3	5.73435	0.23921	-	-	-	KNW-13	351	12
		KNW-12	6662	74	KNW-16	1742	21	KNW-24	1208	16	KNW-6	78	1	KNW-23	943	13	KNW-22	41.2	1.1	KNW-23	172.4	2.1	KNW-5	24.42	0.46	KNW-18	5.7468	0.25066	-	-	-	KNW-12	354	11
		KNW-11	6707	68	KNW-24	1742	18	KNW-22	1217	14	KNW-24	78	1	KNW-24	1006	12	KNW-24	42.33	0.97	KNW-22	180.6	2.7	KNW-2	24.9	0.51	KNW-5	5.77874	0.2613	-	-	-	KNW-11	361	9.1
		KNW-9	6716	78	KNW-4	1744	21	KNW-15	1267	14	KNW-22	78.1	1.1	KNW-7	1161	14	KNW-9	48.5	1.2	KNW-9	196.3	2.6	KNW-20	26.15	0.52	KNW-17	5.87896	0.24604	-	-	-	KNW-15	378	10
		KNW-15	6731	61	KNW-20	1747	18	KNW-16	1267	13	KNW-5	78.37	0.96	KNW-8	1166	13	KNW-8	48.7	1.1	KNW-16	196.7	2.3	KNW-18	26.66	0.53	KNW-20	5.95614	0.25769	-	-	-	KNW-16	400	11
		KNW-8	6738	70	KNW-21	1748	22	KNW-17	1270	12	KNW-4	78.6	1	KNW-9	1172	12	KNW-11	48.8	1.2	KNW-17	199.1	2.4	KNW-17	26.8	0.52	KNW-2	5.9621	0.2846	-	-	-	KNW-19	421	12
		KNW-23	6747	59	KNW-17	1749	18	KNW-12	1276	19	KNW-19	78.6	1.1	KNW-11	1186	12	KNW-7	49.4	1.1	KNW-8	202.1	2.7	KNW-19	27.5	0.54	KNW-16	6.17801	0.32035	-	-	-	KNW-18	438.9	9.8
		KNW-6	6755	56	KNW-14	1755	22	KNW-20	1276	13	KNW-9	78.7	1.2	KNW-16	1191	13	KNW-17	49.72	0.86	KNW-18	205.2	2.5	KNW-1	27.56	0.58	KNW-1	6.27099	0.2848	-	-	-	KNW-17	443	11
		KNW-7	6783	57	KNW-19	1759	16	KNW-19	1277	15	KNW-3	79.1	1.1	KNW-6	1199	14	KNW-16	49.82	0.93	KNW-20	206.4	2.8	KNW-16	29.09	0.57	KNW-19	6.32606	0.22435	-	-	-	KNW-5	462	11
		KNW-10	6794	69	KNW-22	1760	21	KNW-13	1281	16	KNW-21	79.1	1.2	KNW-17	1200	12	KNW-12	50	1.2	KNW-19	209.9	2.7	KNW-6	33.57	0.62	KNW-13	7.91647	0.29625	-	-	-	KNW-20	491	17
		KNW-21	6798	70	KNW-3	1764	20	KNW-14	1286	18	KNW-7	79.2	1.1	KNW-10	1202	13	KNW-10	50.3	1.1	KNW-7	210.6	3	KNW-11	33.87	0.69	KNW-15	7.94978	0.28179	-	-	-	KNW-4	513	12
		KNW-16	6802	71	KNW-8	1768	19	KNW-7	1288	14	KNW-8	79.4	1.2	KNW-15	1210	13	KNW-15	50.4	1	KNW-6	214.6	3.2	KNW-15	33.92	0.57	KNW-6	8.07654	0.33582	-	-	-	KNW-6	543	11
		KNW-20	6814	66	KNW-11	1769	18	KNW-18	1294	16	KNW-14	79.4	1.1	KNW-19	1212	12	KNW-6	50.5	1	KNW-11	221.5	3.2	KNW-13	34.73	0.63	KNW-11	8.14421	0.3073	-	-	-	KNW-23	546	12
		KNW-24	6825	73	KNW-2	1774	22	KNW-8	1296	15	KNW-16	79.5	1.1	KNW-12	1215	15	KNW-19	50.6	1	KNW-10	223.3	3.6	KNW-14	35.12	0.74	KNW-12	8.16673	0.32256	-	-	-	KNW-21	549	13
		KNW-18	6847	63	KNW-12	1774	22	KNW-11	1297	15	KNW-17	79.61	0.98	KNW-20	1218	13	KNW-20	50.7	1.1	KNW-15	225.7	3	KNW-12	35.34	0.77	KNW-14	8.44172	0.36655	-	-	-	KNW-10	552	13
		KNW-22	6862	67	KNW-13	1775	19	KNW-9	1300	16	KNW-2	79.7	1.1	KNW-18	1223	15	KNW-18	50.8	1.2	KNW-12	227.6	2.8	KNW-7	36.53	0.66	KNW-22	8.62442	0.33582	-	-	-	KNW-22	552	11
		KNW-19	6883	66	KNW-15	1776	20	KNW-6	1303	17	KNW-18	79.7	1	KNW-3	1228	13	KNW-13	51	1.1	KNW-14	232	3.3	KNW-10	36.97	0.65	KNW-23	8.67283	0.29625	-	-	-	KNW-24	556	14
		KNW-17	6938	78	KNW-9	1780	16	KNW-10	1310	14	KNW-1	79.9	1.2	KNW-4	1229	16	KNW-5	51.5	1.1	KNW-13	235.2	3.3	KNW-22	38.15	0.69	KNW-7	8.77986	0.39928	-	-	-	KNW-8	558	13
		KNW-4	7048	63	KNW-5	1782	21	KNW-4	1321	15	KNW-20	80.2	1.2	KNW-14	1239	17	KNW-1	51.7	1.2	KNW-2	267.1	3.5	KNW-9	38.18	0.63	KNW-9	8.78849	0.34445	-	-	-	KNW-1	606	25
		KNW-2	7086	61	KNW-1	1783	24	KNW-2	1328	17	KNW-13	80.6	1.1	KNW-2	1242	15	KNW-4	51.7	1.2	KNW-4	267.8	3.7	KNW-8	38.24	0.6	KNW-24	8.9052	0.35992	-	-	-	KNW-3	1011	77
		KNW-5	7087	71	KNW-6	1799	17	KNW-5	1332	12	KNW-12	80.7	1.2	KNW-13	1245	16	KNW-3	51.91	0.98	KNW-3	268.2	4	KNW-23	38.38	0.65	KNW-21	9.1161	0.35329	-	-	-	KNW-2	1270	130
		KNW-3	7096	70	KNW-7	1802	16	KNW-3	1335	15	KNW-15	80.8	1.2	KNW-5	1246	14	KNW-2	52.2	1.1	KNW-1	269.2	3.8	KNW-24	39.92	0.63	KNW-8	9.25165	0.32698	-	-	-	KNW-9	1280	150
		KNW-1	7156	72	KNW-10	1811	19	KNW-1	1354	15	KNW-11	81	1	KNW-1	1248	16	KNW-14	52.6	1.1	KNW-5	270.7	3.1	KNW-21	40.16	0.81	KNW-10	9.27943	0.35992	-	-	-	KNW-7	1630	120
EPMA	IGGCAS	KNW-39	5979.1	40.6579	KNW-45	1728.84	21.7834	KNW-63	1148.59	13.7831	-	-	-	KNW-23	1038.85	15.5827	-	-	-	-	-	-	-	-	-	-	-	-	-	-	-	KNW-27	599.302	2.93658
		KNW-23	6029.71	41.0021	KNW-64	1729.09	21.7865	KNW-47	1153.79	13.8455	-	-	-	KNW-33	1058.93	15.884	-	-	-	-	-	-	-	-	-	-	-	-	-	-	-	KNW-21	634.001	3.10661
		KNW-28	6058.77	41.1996	KNW-60	1742.48	21.9552	KNW-57	1166	13.7588	-	-	-	KNW-25	1062.1	16.1439	-	-	-	-	-	-	-	-	-	-	-	-	-	-	-	KNW-23	656.166	3.28083
		KNW-25	6068.99	41.2691	KNW-63	1754.06	22.452	KNW-58	1174.15	13.855	-	-	-	KNW-22	1069.8	16.0469	-	-	-	-	-	-	-	-	-	-	-	-	-	-	-	KNW-28	660.501	3.3025
		KNW-69	6081.5	41.3542	KNW-59	1757.39	22.1431	KNW-61	1182.55	14.1906	-	-	-	KNW-58	1072.62	16.0893	-	-	-	-	-	-	-	-	-	-	-	-	-	-	-	KNW-25	673.33	3.36665
		KNW-34	6086.44	41.3878	KNW-57	1760.05	22.1767	KNW-54	1182.73	13.9562	-	-	-	KNW-24	1076.02	15.9251	-	-	-	-	-	-	-	-	-	-	-	-	-	-	-	KNW-22	675.133	3.37566
		KNW-24	6101.45	41.4898	KNW-39	1762.93	22.5654	KNW-52	1185.51	13.989	-	-	-	KNW-32	1090.91	16.3637	-	-	-	-	-	-	-	-	-	-	-	-	-	-	-	KNW-26	684.419	3.4221
		KNW-29	6105.48	41.5172	KNW-1	1768.29	22.6341	KNW-51	1186.4	14.2368	-	-	-	KNW-35	1092.24	16.3836	-	-	-	-	-	-	-	-	-	-	-	-	-	-	-	KNW-24	685.286	3.42643
		KNW-21	6111.65	41.5592	KNW-55	1771.76	22.6785	KNW-35	1187.52	14.2503	-	-	-	KNW-31	1095.82	16.6564	-	-	-	-	-	-	-	-	-	-	-	-	-	-	-	KNW-30	733.813	3.66906
		KNW-31	6112.7	41.5664	KNW-46	1774.19	22.7097	KNW-45	1190.71	14.0504	-	-	-	KNW-48	1100.68	16.5102	-	-	-	-	-	-	-	-	-	-	-	-	-	-	-	KNW-31	740.903	3.77861
		KNW-30	6152.2	41.8349	KNW-5	1775.99	23.0879	KNW-56	1191.01	14.0539	-	-	-	KNW-40	1100.81	16.5121	-	-	-	-	-	-	-	-	-	-	-	-	-	-	-	KNW-29	756.794	3.78397
		KNW-36	6167.9	41.9417	KNW-14	1777.57	23.1085	KNW-50	1191.3	14.2956	-	-	-	KNW-34	1108.18	16.6226	-	-	-	-	-	-	-	-	-	-	-	-	-	-	-	KNW-18	758.973	3.87076
		KNW-38	6170.13	41.9569	KNW-9	1778.7	23.123	KNW-41	1192.24	14.3069	-	-	-	KNW-46	1113.51	16.7027	-	-	-	-	-	-	-	-	-	-	-	-	-	-	-	KNW-67	777.77	3.96663
		KNW-32	6170.46	41.9591	KNW-3	1780.64	23.1483	KNW-33	1193.3	14.3196	-	-	-	KNW-37	1113.52	16.7028	-	-	-	-	-	-	-	-	-	-	-	-	-	-	-	KNW-19	800.105	4.08054
		KNW-40	6178.38	42.013	KNW-40	1781.16	22.4427	KNW-68	1193.44	14.3213	-	-	-	KNW-55	1118.53	16.778	-	-	-	-	-	-	-	-	-	-	-	-	-	-	-	KNW-33	807.234	4.11689
		KNW-27	6183.44	42.0474	KNW-53	1781.46	22.4464	KNW-49	1197.21	14.1271	-	-	-	KNW-45	1122.44	16.8366	-	-	-	-	-	-	-	-	-	-	-	-	-	-	-	KNW-68	811.054	4.13638
		KNW-26	6194.85	42.125	KNW-48	1781.58	22.4478	KNW-24	1198.25	14.379	-	-	-	KNW-54	1127.46	16.912	-	-	-	-	-	-	-	-	-	-	-	-	-	-	-	KNW-32	816.178	4.16251
		KNW-33	6203.16	43.4221	KNW-69	1784.3	22.4821	KNW-30	1198.96	14.3875	-	-	-	KNW-29	1129.68	17.1711	-	-	-	-	-	-	-	-	-	-	-	-	-	-	-	KNW-69	824.218	4.20351
		KNW-22	6203.41	42.1832	KNW-7	1787.34	22.878	KNW-39	1199.03	14.3884	-	-	-	KNW-30	1129.79	16.9469	-	-	-	-	-	-	-	-	-	-	-	-	-	-	-	KNW-20	836.238	4.26481
		KNW-48	6208.4	42.2171	KNW-6	1789.17	22.9014	KNW-67	1199.36	14.1524	-	-	-	KNW-42	1131.14	16.9671	-	-	-	-	-	-	-	-	-	-	-	-	-	-	-	KNW-66	842.081	4.29461
		KNW-37	6213.65	42.2528	KNW-33	1789.95	22.9114	KNW-20	1201.78	14.4213	-	-	-	KNW-56	1133.72	17.0058	-	-	-	-	-	-	-	-	-	-	-	-	-	-	-	KNW-49	844.675	4.30784
		KNW-43	6219.37	42.2917	KNW-65	1790.63	22.92	KNW-48	1202.11	14.1849	-	-	-	KNW-63	1134.51	17.2445	-	-	-	-	-	-	-	-	-	-	-	-	-	-	-	KNW-48	848.608	4.3279
		KNW-18	6231.99	43.6239	KNW-61	1790.92	22.9238	KNW-59	1203.43	14.4411	-	-	-	KNW-20	1134.68	17.0202	-	-	-	-	-	-	-	-	-	-	-	-	-	-	-	KNW-34	859.463	4.38326
		KNW-35	6240.5	43.6835	KNW-67	1790.98	22.5664	KNW-65	1204.15	14.4498	-	-	-	KNW-47	1137.72	17.0659	-	-	-	-	-	-	-	-	-	-	-	-	-	-	-	KNW-36	860.637	4.47531
		KNW-50	6247.8	43.7346	KNW-18	1792.3	23.2999	KNW-62	1205.8	14.2284	-	-	-	KNW-21	1152.82	17.5229	-	-	-	-	-	-	-	-	-	-	-	-	-	-	-	KNW-64	866.054	4.41688
		KNW-67	6256.37	42.5433	KNW-52	1793.34	22.596	KNW-42	1206.41	14.477	-	-	-	KNW-9	1153.45	17.7631	-	-	-	-	-	-	-	-	-	-	-	-	-	-	-	KNW-65	870.164	4.52486
		KNW-20	6268.28	43.8779	KNW-56	1794.05	22.9638	KNW-32	1207.22	14.4867	-	-	-	KNW-61	1156.41	17.3461	-	-	-	-	-	-	-	-	-	-	-	-	-	-	-	KNW-63	874.014	4.54487
		KNW-60	6272.12	42.6504	KNW-37	1796.68	22.9975	KNW-38	1207.94	14.4953	-	-	-	KNW-68	1160.23	17.4035	-	-	-	-	-	-	-	-	-	-	-	-	-	-	-	KNW-70	882.676	4.50165
		KNW-4	6274.35	43.9204	KNW-38	1797.86	23.0127	KNW-55	1207.97	14.4957	-	-	-	KNW-52	1160.39	17.1738	-	-	-	-	-	-	-	-	-	-	-	-	-	-	-	KNW-47	888.691	4.53232
		KNW-45	6284.86	43.994	KNW-35	1798.33	23.0187	KNW-25	1209.39	14.7545	-	-	-	KNW-8	1163.34	17.6828	-	-	-	-	-	-	-	-	-	-	-	-	-	-	-	KNW-50	888.956	4.62257
		KNW-49	6291.37	44.0396	KNW-70	1798.56	22.6619	KNW-37	1209.83	14.5179	-	-	-	KNW-43	1163.37	17.6832	-	-	-	-	-	-	-	-	-	-	-	-	-	-	-	KNW-40	893.09	4.64407
		KNW-63	6299.14	44.094	KNW-21	1798.84	23.0252	KNW-64	1214.09	14.569	-	-	-	KNW-59	1166.23	17.4934	-	-	-	-	-	-	-	-	-	-	-	-	-	-	-	KNW-46	896.635	4.57284
		KNW-19	6305.71	44.14	KNW-27	1798.91	23.026	KNW-40	1216.21	14.5945	-	-	-	KNW-53	1174.58	17.6186	-	-	-	-	-	-	-	-	-	-	-	-	-	-	-	KNW-62	910.131	4.64167
		KNW-47	6306.19	44.1433	KNW-43	1800.77	23.0498	KNW-69	1216.7	14.3571	-	-	-	KNW-39	1174.95	17.8592	-	-	-	-	-	-	-	-	-	-	-	-	-	-	-	KNW-37	913.891	4.75223
		KNW-42	6311.09	44.1776	KNW-66	1800.87	22.6909	KNW-46	1222.96	14.6755	-	-	-	KNW-51	1175.35	17.8653	-	-	-	-	-	-	-	-	-	-	-	-	-	-	-	KNW-39	914.072	4.75318
		KNW-41	6322.5	44.2575	KNW-58	1801.44	23.0585	KNW-66	1233.44	14.8013	-	-	-	KNW-16	1176.28	18.1146	-	-	-	-	-	-	-	-	-	-	-	-	-	-	-	KNW-42	925.385	4.812
		KNW-65	6323.53	44.2647	KNW-49	1801.84	23.0635	KNW-34	1234.54	14.8145	-	-	-	KNW-38	1176.84	17.888	-	-	-	-	-	-	-	-	-	-	-	-	-	-	-	KNW-38	931.037	4.84139
		KNW-64	6327.93	44.2955	KNW-12	1802.24	23.4291	KNW-60	1234.72	14.5697	-	-	-	KNW-6	1180.11	17.9377	-	-	-	-	-	-	-	-	-	-	-	-	-	-	-	KNW-43	936.519	4.8699
		KNW-46	6328.66	44.3006	KNW-8	1803.53	23.4458	KNW-22	1240.08	14.881	-	-	-	KNW-50	1181.26	17.9551	-	-	-	-	-	-	-	-	-	-	-	-	-	-	-	KNW-44	940.627	4.89126
		KNW-70	6331.71	44.322	KNW-51	1806.22	23.1196	KNW-21	1240.96	14.8915	-	-	-	KNW-28	1182.69	17.9768	-	-	-	-	-	-	-	-	-	-	-	-	-	-	-	KNW-45	940.721	4.89175
		KNW-61	6332.07	44.3245	KNW-30	1807.46	23.1355	KNW-31	1242.19	14.9063	-	-	-	KNW-10	1185.58	18.0208	-	-	-	-	-	-	-	-	-	-	-	-	-	-	-	KNW-60	942.125	4.89905
		KNW-66	6343.28	44.4029	KNW-4	1807.81	23.5016	KNW-7	1243.24	15.1675	-	-	-	KNW-62	1187.7	17.8154	-	-	-	-	-	-	-	-	-	-	-	-	-	-	-	KNW-58	947.969	4.92944
		KNW-44	6343.46	44.4042	KNW-31	1808.65	23.1507	KNW-12	1245.86	15.1995	-	-	-	KNW-69	1188.52	17.8279	-	-	-	-	-	-	-	-	-	-	-	-	-	-	-	KNW-59	949.069	4.93516
		KNW-59	6343.88	44.4072	KNW-17	1809.14	23.157	KNW-18	1248.6	15.2329	-	-	-	KNW-19	1188.64	18.0674	-	-	-	-	-	-	-	-	-	-	-	-	-	-	-	KNW-6	953.09	4.95607
		KNW-57	6347.65	44.4335	KNW-13	1809.42	23.5225	KNW-70	1249.03	14.7386	-	-	-	KNW-7	1193.23	18.3757	-	-	-	-	-	-	-	-	-	-	-	-	-	-	-	KNW-54	964.675	5.01631
		KNW-62	6371.92	44.6035	KNW-15	1809.78	23.1652	KNW-2	1249.62	15.2454	-	-	-	KNW-65	1196.1	18.1807	-	-	-	-	-	-	-	-	-	-	-	-	-	-	-	KNW-41	983.5	5.21255
		KNW-51	6375	44.625	KNW-2	1811.45	23.1866	KNW-44	1249.82	14.9978	-	-	-	KNW-67	1199.36	17.9903	-	-	-	-	-	-	-	-	-	-	-	-	-	-	-	KNW-56	992.004	5.15842
		KNW-58	6378.44	44.6491	KNW-11	1812.07	23.5569	KNW-53	1249.93	14.9992	-	-	-	KNW-60	1199.53	17.9929	-	-	-	-	-	-	-	-	-	-	-	-	-	-	-	KNW-17	993.175	5.26383
		KNW-2	6381.07	44.6675	KNW-42	1813.63	23.2145	KNW-1	1250.5	15.2561	-	-	-	KNW-49	1200.22	18.2434	-	-	-	-	-	-	-	-	-	-	-	-	-	-	-	KNW-57	1001.15	5.20597
		KNW-1	6392.44	46.0255	KNW-68	1814.31	23.2231	KNW-13	1250.98	15.262	-	-	-	KNW-57	1204.19	18.0629	-	-	-	-	-	-	-	-	-	-	-	-	-	-	-	KNW-55	1004.97	5.32634
		KNW-68	6396.87	44.7781	KNW-50	1815.08	23.596	KNW-11	1251.74	15.5215	-	-	-	KNW-15	1206.19	18.3341	-	-	-	-	-	-	-	-	-	-	-	-	-	-	-	KNW-5	1005.99	5.43237
		KNW-55	6404.67	44.8327	KNW-36	1815.56	23.2392	KNW-36	1251.84	15.022	-	-	-	KNW-12	1212.83	18.6777	-	-	-	-	-	-	-	-	-	-	-	-	-	-	-	KNW-51	1006.58	5.33487
		KNW-52	6405.77	44.8404	KNW-44	1817.01	23.2577	KNW-43	1252.71	15.0325	-	-	-	KNW-2	1213.63	18.4472	-	-	-	-	-	-	-	-	-	-	-	-	-	-	-	KNW-52	1007.68	5.23996
		KNW-14	6412.68	46.1713	KNW-28	1819.13	23.2849	KNW-10	1254.61	15.0554	-	-	-	KNW-4	1214.87	18.952	-	-	-	-	-	-	-	-	-	-	-	-	-	-	-	KNW-61	1009.59	5.24988
		KNW-8	6414.87	46.1871	KNW-26	1821.78	23.3188	KNW-23	1256.23	15.0748	-	-	-	KNW-14	1215.08	18.7122	-	-	-	-	-	-	-	-	-	-	-	-	-	-	-	KNW-4	1013.89	5.37364
		KNW-3	6420.7	46.229	KNW-62	1824.29	23.3509	KNW-6	1262.12	15.1454	-	-	-	KNW-36	1225.76	18.6315	-	-	-	-	-	-	-	-	-	-	-	-	-	-	-	KNW-3	1018.79	5.50148
		KNW-56	6427.42	44.9919	KNW-34	1826.23	23.741	KNW-29	1262.99	15.1559	-	-	-	KNW-18	1228.58	19.1658	-	-	-	-	-	-	-	-	-	-	-	-	-	-	-	KNW-7	1027.2	5.44415
		KNW-54	6429.16	45.0041	KNW-23	1829.25	23.4144	KNW-9	1268.5	15.4757	-	-	-	KNW-66	1229.42	18.4413	-	-	-	-	-	-	-	-	-	-	-	-	-	-	-	KNW-2	1036.69	5.49444
		KNW-7	6454.25	46.4706	KNW-16	1830.98	23.4366	KNW-4	1269.87	15.7464	-	-	-	KNW-17	1234.46	19.0107	-	-	-	-	-	-	-	-	-	-	-	-	-	-	-	KNW-12	1040.72	5.61987
		KNW-9	6460.53	46.5158	KNW-29	1833.35	23.4668	KNW-14	1271.13	15.5077	-	-	-	KNW-27	1236.69	18.7976	-	-	-	-	-	-	-	-	-	-	-	-	-	-	-	KNW-9	1045.41	5.54067
		KNW-15	6473.38	46.6083	KNW-22	1834.08	23.4762	KNW-17	1277.51	15.5856	-	-	-	KNW-13	1238.98	19.0802	-	-	-	-	-	-	-	-	-	-	-	-	-	-	-	KNW-16	1050.14	5.56573
		KNW-6	6474.61	46.6172	KNW-54	1835.9	23.4995	KNW-8	1278.37	15.5962	-	-	-	KNW-11	1240.73	19.3554	-	-	-	-	-	-	-	-	-	-	-	-	-	-	-	KNW-13	1051.83	5.67987
		KNW-5	6475.97	46.627	KNW-24	1840.45	23.9259	KNW-28	1278.91	15.3469	-	-	-	KNW-64	1242.25	18.8822	-	-	-	-	-	-	-	-	-	-	-	-	-	-	-	KNW-53	1064.05	5.63947
		KNW-53	6491.82	45.4427	KNW-41	1840.55	23.9272	KNW-16	1279.39	15.6085	-	-	-	KNW-44	1242.79	18.8904	-	-	-	-	-	-	-	-	-	-	-	-	-	-	-	KNW-1	1066.57	5.75949
		KNW-16	6502.05	46.8147	KNW-47	1844.66	23.6117	KNW-19	1279.77	15.3572	-	-	-	KNW-3	1245.75	19.4337	-	-	-	-	-	-	-	-	-	-	-	-	-	-	-	KNW-8	1075.31	5.8067
		KNW-11	6510.83	46.878	KNW-10	1849.91	23.6788	KNW-5	1280.99	15.8843	-	-	-	KNW-1	1248.5	19.2269	-	-	-	-	-	-	-	-	-	-	-	-	-	-	-	KNW-14	1078.96	5.82636
		KNW-13	6518.13	46.9305	KNW-19	1852.56	24.0833	KNW-15	1283.26	15.6558	-	-	-	KNW-41	1249.45	19.2415	-	-	-	-	-	-	-	-	-	-	-	-	-	-	-	KNW-15	1093.08	5.79331
		KNW-10	6541.21	47.0967	KNW-32	1862.97	24.2186	KNW-27	1294.81	15.7967	-	-	-	KNW-70	1258.09	18.8713	-	-	-	-	-	-	-	-	-	-	-	-	-	-	-	KNW-10	1094.54	5.9105
		KNW-17	6565.77	47.2735	KNW-20	1865.76	24.2549	KNW-3	1308.73	15.9666	-	-	-	KNW-5	1273.99	19.8743	-	-	-	-	-	-	-	-	-	-	-	-	-	-	-	KNW-11	1115.66	6.02455
		KNW-12	6573.52	47.3294	KNW-25	1874.7	24.3711	KNW-26	1318.74	15.8248	-	-	-	KNW-26	1305.71	19.8468	-	-	-	-	-	-	-	-	-	-	-	-	-	-	-	KNW-35	2837.41	20.1456
	CUG	-	-	-	-	-	-	-	-	-	-	-	-	KNW-13	1006.81	6.28	-	-	-	-	-	-	-	-	-	-	-	-	-	-	-	-	-	-
		-	-	-	-	-	-	-	-	-	-	-	-	KNW-12	1014.21	6.18	-	-	-	-	-	-	-	-	-	-	-	-	-	-	-	-	-	-
		-	-	-	-	-	-	-	-	-	-	-	-	KNW-11	1029.02	6.16	-	-	-	-	-	-	-	-	-	-	-	-	-	-	-	-	-	-
		-	-	-	-	-	-	-	-	-	-	-	-	KNW-14	1036.42	6.1	-	-	-	-	-	-	-	-	-	-	-	-	-	-	-	-	-	-
		-	-	-	-	-	-	-	-	-	-	-	-	KNW-15	1051.23	6.06	-	-	-	-	-	-	-	-	-	-	-	-	-	-	-	-	-	-
		-	-	-	-	-	-	-	-	-	-	-	-	KNW-23	1140.06	5.16	-	-	-	-	-	-	-	-	-	-	-	-	-	-	-	-	-	-
		-	-	-	-	-	-	-	-	-	-	-	-	KNW-8	1147.47	5.1	-	-	-	-	-	-	-	-	-	-	-	-	-	-	-	-	-	-
		-	-	-	-	-	-	-	-	-	-	-	-	KNW-25	1147.47	5.12	-	-	-	-	-	-	-	-	-	-	-	-	-	-	-	-	-	-
		-	-	-	-	-	-	-	-	-	-	-	-	KNW-7	1154.87	5.06	-	-	-	-	-	-	-	-	-	-	-	-	-	-	-	-	-	-
		-	-	-	-	-	-	-	-	-	-	-	-	KNW-3	1162.27	5.54	-	-	-	-	-	-	-	-	-	-	-	-	-	-	-	-	-	-
		-	-	-	-	-	-	-	-	-	-	-	-	KNW-5	1169.68	5.54	-	-	-	-	-	-	-	-	-	-	-	-	-	-	-	-	-	-
		-	-	-	-	-	-	-	-	-	-	-	-	KNW-19	1169.68	5.52	-	-	-	-	-	-	-	-	-	-	-	-	-	-	-	-	-	-
		-	-	-	-	-	-	-	-	-	-	-	-	KNW-21	1169.68	5	-	-	-	-	-	-	-	-	-	-	-	-	-	-	-	-	-	-
		-	-	-	-	-	-	-	-	-	-	-	-	KNW-24	1184.48	4.98	-	-	-	-	-	-	-	-	-	-	-	-	-	-	-	-	-	-
		-	-	-	-	-	-	-	-	-	-	-	-	KNW-9	1191.89	4.92	-	-	-	-	-	-	-	-	-	-	-	-	-	-	-	-	-	-
		-	-	-	-	-	-	-	-	-	-	-	-	KNW-1	1199.29	5.44	-	-	-	-	-	-	-	-	-	-	-	-	-	-	-	-	-	-
		-	-	-	-	-	-	-	-	-	-	-	-	KNW-6	1199.29	4.86	-	-	-	-	-	-	-	-	-	-	-	-	-	-	-	-	-	-
		-	-	-	-	-	-	-	-	-	-	-	-	KNW-20	1199.29	5.38	-	-	-	-	-	-	-	-	-	-	-	-	-	-	-	-	-	-
		-	-	-	-	-	-	-	-	-	-	-	-	KNW-10	1206.69	4.86	-	-	-	-	-	-	-	-	-	-	-	-	-	-	-	-	-	-
		-	-	-	-	-	-	-	-	-	-	-	-	KNW-4	1214.1	5.34	-	-	-	-	-	-	-	-	-	-	-	-	-	-	-	-	-	-
		-	-	-	-	-	-	-	-	-	-	-	-	KNW-16	1214.1	5.3	-	-	-	-	-	-	-	-	-	-	-	-	-	-	-	-	-	-
		-	-	-	-	-	-	-	-	-	-	-	-	KNW-17	1214.1	5.26	-	-	-	-	-	-	-	-	-	-	-	-	-	-	-	-	-	-
		-	-	-	-	-	-	-	-	-	-	-	-	KNW-18	1221.5	5.3	-	-	-	-	-	-	-	-	-	-	-	-	-	-	-	-	-	-
		-	-	-	-	-	-	-	-	-	-	-	-	KNW-22	1221.5	4.8	-	-	-	-	-	-	-	-	-	-	-	-	-	-	-	-	-	-
		-	-	-	-	-	-	-	-	-	-	-	-	KNW-2	1236.3	5.22	-	-	-	-	-	-	-	-	-	-	-	-	-	-	-	-	-	-
	WMAT	-	-	-	-	-	-	-	-	-	-	-	-	KNW-13	1073.44	3.52	-	-	-	-	-	-	-	-	-	-	-	-	-	-	-	-	-	-
		-	-	-	-	-	-	-	-	-	-	-	-	KNW-14	1073.44	3.52	-	-	-	-	-	-	-	-	-	-	-	-	-	-	-	-	-	-
		-	-	-	-	-	-	-	-	-	-	-	-	KNW-11	1088.24	3.5	-	-	-	-	-	-	-	-	-	-	-	-	-	-	-	-	-	-
		-	-	-	-	-	-	-	-	-	-	-	-	KNW-15	1117.86	3.4	-	-	-	-	-	-	-	-	-	-	-	-	-	-	-	-	-	-
		-	-	-	-	-	-	-	-	-	-	-	-	KNW-12	1125.26	3.36	-	-	-	-	-	-	-	-	-	-	-	-	-	-	-	-	-	-
		-	-	-	-	-	-	-	-	-	-	-	-	KNW-21	1199.29	3.22	-	-	-	-	-	-	-	-	-	-	-	-	-	-	-	-	-	-
		-	-	-	-	-	-	-	-	-	-	-	-	KNW-6	1214.1	3.18	-	-	-	-	-	-	-	-	-	-	-	-	-	-	-	-	-	-
		-	-	-	-	-	-	-	-	-	-	-	-	KNW-18	1214.1	3.2	-	-	-	-	-	-	-	-	-	-	-	-	-	-	-	-	-	-
		-	-	-	-	-	-	-	-	-	-	-	-	KNW-2	1221.5	3.16	-	-	-	-	-	-	-	-	-	-	-	-	-	-	-	-	-	-
		-	-	-	-	-	-	-	-	-	-	-	-	KNW-7	1236.3	3.12	-	-	-	-	-	-	-	-	-	-	-	-	-	-	-	-	-	-
		-	-	-	-	-	-	-	-	-	-	-	-	KNW-22	1236.3	3.12	-	-	-	-	-	-	-	-	-	-	-	-	-	-	-	-	-	-
		-	-	-	-	-	-	-	-	-	-	-	-	KNW-8	1243.71	3.1	-	-	-	-	-	-	-	-	-	-	-	-	-	-	-	-	-	-
		-	-	-	-	-	-	-	-	-	-	-	-	KNW-19	1243.71	3.14	-	-	-	-	-	-	-	-	-	-	-	-	-	-	-	-	-	-
		-	-	-	-	-	-	-	-	-	-	-	-	KNW-25	1243.71	3.14	-	-	-	-	-	-	-	-	-	-	-	-	-	-	-	-	-	-
		-	-	-	-	-	-	-	-	-	-	-	-	KNW-3	1251.11	3.08	-	-	-	-	-	-	-	-	-	-	-	-	-	-	-	-	-	-
		-	-	-	-	-	-	-	-	-	-	-	-	KNW-9	1251.11	3.08	-	-	-	-	-	-	-	-	-	-	-	-	-	-	-	-	-	-
		-	-	-	-	-	-	-	-	-	-	-	-	KNW-17	1251.11	3.12	-	-	-	-	-	-	-	-	-	-	-	-	-	-	-	-	-	-
		-	-	-	-	-	-	-	-	-	-	-	-	KNW-4	1258.51	3.06	-	-	-	-	-	-	-	-	-	-	-	-	-	-	-	-	-	-
		-	-	-	-	-	-	-	-	-	-	-	-	KNW-10	1258.51	3.08	-	-	-	-	-	-	-	-	-	-	-	-	-	-	-	-	-	-
		-	-	-	-	-	-	-	-	-	-	-	-	KNW-20	1258.51	3.08	-	-	-	-	-	-	-	-	-	-	-	-	-	-	-	-	-	-
		-	-	-	-	-	-	-	-	-	-	-	-	KNW-23	1265.92	3.06	-	-	-	-	-	-	-	-	-	-	-	-	-	-	-	-	-	-
		-	-	-	-	-	-	-	-	-	-	-	-	KNW-24	1265.92	3.08	-	-	-	-	-	-	-	-	-	-	-	-	-	-	-	-	-	-
		-	-	-	-	-	-	-	-	-	-	-	-	KNW-1	1288.13	3.02	-	-	-	-	-	-	-	-	-	-	-	-	-	-	-	-	-	-
		-	-	-	-	-	-	-	-	-	-	-	-	KNW-16	1295.53	3.04	-	-	-	-	-	-	-	-	-	-	-	-	-	-	-	-	-	-
		-	-	-	-	-	-	-	-	-	-	-	-	KNW-5	1317.74	2.96	-	-	-	-	-	-	-	-	-	-	-	-	-	-	-	-	-	-
	NWU	KNW-36	6301.36	44	KNW-78	1087.88	24	KNW-2	997.536	14	-	-	-	KNW-40	830.636	12.1302	-	-	-	-	-	-	-	-	-	-	-	-	-	-	-	-	-	-
		KNW-32	6328.55	44	KNW-23	1160.41	24	KNW-25	863.32	14	-	-	-	KNW-78	915.032	12.1015	-	-	-	-	-	-	-	-	-	-	-	-	-	-	-	-	-	-
		KNW-27	6360.5	44	KNW-75	1181.62	24	KNW-21	890.582	14	-	-	-	KNW-36	994.987	12.0699	-	-	-	-	-	-	-	-	-	-	-	-	-	-	-	-	-	-
		KNW-35	6388.37	44	KNW-11	1189.14	24	KNW-80	900.369	14	-	-	-	KNW-3	1008.31	12.036	-	-	-	-	-	-	-	-	-	-	-	-	-	-	-	-	-	-
		KNW-37	6402.64	44	KNW-25	1203.51	24	KNW-15	902.466	14	-	-	-	KNW-74	1023.12	12.0026	-	-	-	-	-	-	-	-	-	-	-	-	-	-	-	-	-	-
		KNW-30	6559.66	44	KNW-35	1211.04	24	KNW-23	905.262	14	-	-	-	KNW-28	1027.56	11.9685	-	-	-	-	-	-	-	-	-	-	-	-	-	-	-	-	-	-
		KNW-31	6573.26	44	KNW-24	1261.67	24	KNW-50	917.845	14	-	-	-	KNW-33	1027.56	11.9355	-	-	-	-	-	-	-	-	-	-	-	-	-	-	-	-	-	-
		KNW-34	6616.76	44	KNW-80	1287.67	24	KNW-40	918.544	14	-	-	-	KNW-71	1031.26	11.8986	-	-	-	-	-	-	-	-	-	-	-	-	-	-	-	-	-	-
		KNW-17	6633.08	44	KNW-45	1291.77	24	KNW-7	929.03	14	-	-	-	KNW-66	1049.03	11.8613	-	-	-	-	-	-	-	-	-	-	-	-	-	-	-	-	-	-
		KNW-29	6635.8	44	KNW-12	1297.25	24	KNW-26	948.603	14	-	-	-	KNW-27	1052.73	11.8213	-	-	-	-	-	-	-	-	-	-	-	-	-	-	-	-	-	-
		KNW-33	6641.91	44	KNW-40	1297.93	24	KNW-34	948.603	14	-	-	-	KNW-38	1056.43	11.7822	-	-	-	-	-	-	-	-	-	-	-	-	-	-	-	-	-	-
		KNW-38	6648.71	44	KNW-41	1301.35	24	KNW-3	949.302	14	-	-	-	KNW-79	1057.91	11.7428	-	-	-	-	-	-	-	-	-	-	-	-	-	-	-	-	-	-
		KNW-12	6747.96	44	KNW-59	1306.14	24	KNW-36	954.894	14	-	-	-	KNW-64	1060.13	11.7022	-	-	-	-	-	-	-	-	-	-	-	-	-	-	-	-	-	-
		KNW-26	6747.96	44	KNW-17	1308.88	24	KNW-51	961.186	14	-	-	-	KNW-63	1061.62	11.6605	-	-	-	-	-	-	-	-	-	-	-	-	-	-	-	-	-	-
		KNW-47	6779.23	44	KNW-20	1353.35	24	KNW-73	965.38	14	-	-	-	KNW-24	1062.36	11.6185	-	-	-	-	-	-	-	-	-	-	-	-	-	-	-	-	-	-
		KNW-55	6786.02	44	KNW-19	1356.77	24	KNW-31	968.176	14	-	-	-	KNW-61	1063.84	11.5755	-	-	-	-	-	-	-	-	-	-	-	-	-	-	-	-	-	-
		KNW-14	6854	44	KNW-9	1358.83	24	KNW-37	970.273	14	-	-	-	KNW-37	1064.58	11.5316	-	-	-	-	-	-	-	-	-	-	-	-	-	-	-	-	-	-
		KNW-75	6873.71	44	KNW-37	1359.51	24	KNW-49	973.069	14	-	-	-	KNW-62	1066.06	11.4868	-	-	-	-	-	-	-	-	-	-	-	-	-	-	-	-	-	-
		KNW-39	6879.15	44	KNW-53	1386.88	24	KNW-57	975.167	14	-	-	-	KNW-76	1085.31	11.4394	-	-	-	-	-	-	-	-	-	-	-	-	-	-	-	-	-	-
		KNW-28	6912.46	44	KNW-6	1420.4	24	KNW-52	984.953	14	-	-	-	KNW-73	1089.01	11.3935	-	-	-	-	-	-	-	-	-	-	-	-	-	-	-	-	-	-
		KNW-23	6924.69	44	KNW-77	1435.46	24	KNW-48	987.749	14	-	-	-	KNW-1	1100.11	11.3471	-	-	-	-	-	-	-	-	-	-	-	-	-	-	-	-	-	-
		KNW-57	6938.29	44	KNW-30	1438.88	24	KNW-78	989.147	14	-	-	-	KNW-14	1100.85	11.2999	-	-	-	-	-	-	-	-	-	-	-	-	-	-	-	-	-	-
		KNW-15	6964.12	44	KNW-46	1443.67	24	KNW-20	991.245	14	-	-	-	KNW-23	1103.07	11.2504	-	-	-	-	-	-	-	-	-	-	-	-	-	-	-	-	-	-
		KNW-25	6968.2	44	KNW-50	1443.67	24	KNW-10	991.944	14	-	-	-	KNW-72	1109	11.2023	-	-	-	-	-	-	-	-	-	-	-	-	-	-	-	-	-	-
		KNW-76	6968.2	44	KNW-67	1461.46	24	KNW-42	994.041	14	-	-	-	KNW-67	1111.96	11.1534	-	-	-	-	-	-	-	-	-	-	-	-	-	-	-	-	-	-
		KNW-24	6986.55	44	KNW-15	1462.82	24	KNW-24	1000.33	14	-	-	-	KNW-25	1116.4	11.1004	-	-	-	-	-	-	-	-	-	-	-	-	-	-	-	-	-	-
		KNW-58	6990.63	44	KNW-43	1477.88	24	KNW-47	1001.03	14	-	-	-	KNW-41	1116.4	11.0448	-	-	-	-	-	-	-	-	-	-	-	-	-	-	-	-	-	-
		KNW-50	7025.98	44	KNW-14	1481.3	24	KNW-38	1001.73	14	-	-	-	KNW-77	1117.14	10.9923	-	-	-	-	-	-	-	-	-	-	-	-	-	-	-	-	-	-
		KNW-40	7059.97	44	KNW-56	1489.51	24	KNW-22	1002.43	14	-	-	-	KNW-32	1120.84	10.9389	-	-	-	-	-	-	-	-	-	-	-	-	-	-	-	-	-	-
		KNW-77	7095.31	44	KNW-3	1490.19	24	KNW-59	1003.13	14	-	-	-	KNW-69	1120.84	10.8869	-	-	-	-	-	-	-	-	-	-	-	-	-	-	-	-	-	-
		KNW-9	7130.66	44	KNW-28	1504.56	24	KNW-19	1015.71	14	-	-	-	KNW-10	1123.06	10.8303	-	-	-	-	-	-	-	-	-	-	-	-	-	-	-	-	-	-
		KNW-44	7143.58	44	KNW-57	1512.77	24	KNW-58	1019.91	14	-	-	-	KNW-31	1124.54	10.7732	-	-	-	-	-	-	-	-	-	-	-	-	-	-	-	-	-	-
		KNW-11	7152.41	44	KNW-65	1532.61	24	KNW-30	1023.4	14	-	-	-	KNW-55	1125.28	10.7172	-	-	-	-	-	-	-	-	-	-	-	-	-	-	-	-	-	-
		KNW-49	7153.09	44	KNW-54	1546.98	24	KNW-28	1025.5	14	-	-	-	KNW-53	1128.24	10.6597	-	-	-	-	-	-	-	-	-	-	-	-	-	-	-	-	-	-
		KNW-54	7179.6	44	KNW-34	1561.35	24	KNW-1	1028.99	14	-	-	-	KNW-8	1134.91	10.5997	-	-	-	-	-	-	-	-	-	-	-	-	-	-	-	-	-	-
		KNW-48	7185.72	44	KNW-66	1561.35	24	KNW-6	1029.69	14	-	-	-	KNW-70	1140.09	10.5391	-	-	-	-	-	-	-	-	-	-	-	-	-	-	-	-	-	-
		KNW-10	7209.51	44	KNW-36	1578.45	24	KNW-79	1031.09	14	-	-	-	KNW-4	1146.01	10.476	-	-	-	-	-	-	-	-	-	-	-	-	-	-	-	-	-	-
		KNW-78	7296.52	44	KNW-72	1590.09	24	KNW-45	1033.89	14	-	-	-	KNW-29	1147.49	10.4142	-	-	-	-	-	-	-	-	-	-	-	-	-	-	-	-	-	-
		KNW-59	7342.07	44	KNW-18	1605.14	24	KNW-12	1035.98	14	-	-	-	KNW-39	1149.71	10.3516	-	-	-	-	-	-	-	-	-	-	-	-	-	-	-	-	-	-
		KNW-46	7360.42	44	KNW-8	1607.88	24	KNW-13	1038.08	14	-	-	-	KNW-68	1154.9	10.2882	-	-	-	-	-	-	-	-	-	-	-	-	-	-	-	-	-	-
		KNW-42	7374.01	44	KNW-38	1609.93	24	KNW-54	1038.08	14	-	-	-	KNW-60	1157.12	10.2241	-	-	-	-	-	-	-	-	-	-	-	-	-	-	-	-	-	-
		KNW-6	7382.85	44	KNW-21	1620.88	24	KNW-16	1038.78	14	-	-	-	KNW-16	1163.78	10.1591	-	-	-	-	-	-	-	-	-	-	-	-	-	-	-	-	-	-
		KNW-56	7388.97	44	KNW-63	1625.66	24	KNW-56	1038.78	14	-	-	-	KNW-20	1165.26	10.0953	-	-	-	-	-	-	-	-	-	-	-	-	-	-	-	-	-	-
		KNW-73	7418.2	44	KNW-31	1634.56	24	KNW-5	1040.18	14	-	-	-	KNW-21	1166	10.0309	-	-	-	-	-	-	-	-	-	-	-	-	-	-	-	-	-	-
		KNW-74	7422.96	44	KNW-47	1641.4	24	KNW-53	1042.27	14	-	-	-	KNW-65	1170.44	9.96394	-	-	-	-	-	-	-	-	-	-	-	-	-	-	-	-	-	-
		KNW-43	7471.9	44	KNW-4	1660.56	24	KNW-33	1043.67	14	-	-	-	KNW-13	1172.66	9.89384	-	-	-	-	-	-	-	-	-	-	-	-	-	-	-	-	-	-
		KNW-66	7500.45	44	KNW-42	1680.4	24	KNW-29	1044.37	14	-	-	-	KNW-43	1174.14	9.82478	-	-	-	-	-	-	-	-	-	-	-	-	-	-	-	-	-	-
		KNW-7	7502.49	44	KNW-52	1692.03	24	KNW-60	1044.37	14	-	-	-	KNW-5	1176.36	9.75673	-	-	-	-	-	-	-	-	-	-	-	-	-	-	-	-	-	-
		KNW-20	7519.48	44	KNW-74	1692.72	24	KNW-14	1049.27	14	-	-	-	KNW-52	1176.36	9.6881	-	-	-	-	-	-	-	-	-	-	-	-	-	-	-	-	-	-
		KNW-61	7526.96	44	KNW-16	1693.4	24	KNW-17	1052.76	14	-	-	-	KNW-11	1180.07	9.61681	-	-	-	-	-	-	-	-	-	-	-	-	-	-	-	-	-	-
		KNW-60	7545.31	44	KNW-62	1693.4	24	KNW-27	1052.76	14	-	-	-	KNW-30	1184.51	9.54642	-	-	-	-	-	-	-	-	-	-	-	-	-	-	-	-	-	-
		KNW-45	7553.47	44	KNW-70	1696.14	24	KNW-77	1052.76	14	-	-	-	KNW-75	1185.99	9.47319	-	-	-	-	-	-	-	-	-	-	-	-	-	-	-	-	-	-
		KNW-19	7554.83	44	KNW-32	1702.3	24	KNW-4	1056.95	14	-	-	-	KNW-44	1187.47	9.39649	-	-	-	-	-	-	-	-	-	-	-	-	-	-	-	-	-	-
		KNW-65	7555.51	44	KNW-55	1724.87	24	KNW-43	1057.65	14	-	-	-	KNW-12	1191.17	9.32106	-	-	-	-	-	-	-	-	-	-	-	-	-	-	-	-	-	-
		KNW-3	7584.74	44	KNW-48	1733.08	24	KNW-69	1061.15	14	-	-	-	KNW-34	1192.65	9.24081	-	-	-	-	-	-	-	-	-	-	-	-	-	-	-	-	-	-
		KNW-72	7586.1	44	KNW-60	1733.08	24	KNW-35	1062.55	14	-	-	-	KNW-26	1194.13	9.16188	-	-	-	-	-	-	-	-	-	-	-	-	-	-	-	-	-	-
		KNW-16	7594.94	44	KNW-44	1744.72	24	KNW-75	1062.55	14	-	-	-	KNW-9	1198.57	9.08296	-	-	-	-	-	-	-	-	-	-	-	-	-	-	-	-	-	-
		KNW-52	7610.57	44	KNW-64	1750.87	24	KNW-39	1070.24	14	-	-	-	KNW-46	1204.5	8.99894	-	-	-	-	-	-	-	-	-	-	-	-	-	-	-	-	-	-
		KNW-18	7614.65	44	KNW-7	1766.61	24	KNW-76	1070.24	14	-	-	-	KNW-19	1206.72	8.92026	-	-	-	-	-	-	-	-	-	-	-	-	-	-	-	-	-	-
		KNW-13	7676.51	44	KNW-13	1770.03	24	KNW-63	1070.94	14	-	-	-	KNW-57	1206.72	8.83617	-	-	-	-	-	-	-	-	-	-	-	-	-	-	-	-	-	-
		KNW-21	7685.34	44	KNW-58	1770.03	24	KNW-32	1073.73	14	-	-	-	KNW-22	1216.34	8.75316	-	-	-	-	-	-	-	-	-	-	-	-	-	-	-	-	-	-
		KNW-22	7693.5	44	KNW-61	1781.66	24	KNW-66	1075.13	14	-	-	-	KNW-58	1217.82	8.6671	-	-	-	-	-	-	-	-	-	-	-	-	-	-	-	-	-	-
		KNW-80	7696.9	44	KNW-2	1794.66	24	KNW-72	1079.32	14	-	-	-	KNW-42	1218.56	8.57803	-	-	-	-	-	-	-	-	-	-	-	-	-	-	-	-	-	-
		KNW-62	7701.66	44	KNW-1	1800.14	24	KNW-61	1084.22	14	-	-	-	KNW-54	1218.56	8.49216	-	-	-	-	-	-	-	-	-	-	-	-	-	-	-	-	-	-
		KNW-4	7720.01	44	KNW-51	1800.14	24	KNW-18	1089.11	14	-	-	-	KNW-47	1220.04	8.40551	-	-	-	-	-	-	-	-	-	-	-	-	-	-	-	-	-	-
		KNW-67	7739.72	44	KNW-39	1800.82	24	KNW-8	1090.51	14	-	-	-	KNW-6	1223.74	8.31361	-	-	-	-	-	-	-	-	-	-	-	-	-	-	-	-	-	-
		KNW-79	7745.16	44	KNW-22	1801.5	24	KNW-55	1091.91	14	-	-	-	KNW-48	1235.59	8.22266	-	-	-	-	-	-	-	-	-	-	-	-	-	-	-	-	-	-
		KNW-69	7754.68	44	KNW-71	1818.61	24	KNW-46	1092.61	14	-	-	-	KNW-2	1242.99	8.13084	-	-	-	-	-	-	-	-	-	-	-	-	-	-	-	-	-	-
		KNW-8	7764.87	44	KNW-76	1818.61	24	KNW-74	1097.5	14	-	-	-	KNW-18	1245.21	8.04133	-	-	-	-	-	-	-	-	-	-	-	-	-	-	-	-	-	-
		KNW-64	7764.87	44	KNW-69	1831.61	24	KNW-65	1099.6	14	-	-	-	KNW-35	1250.4	7.94273	-	-	-	-	-	-	-	-	-	-	-	-	-	-	-	-	-	-
		KNW-68	7781.19	44	KNW-73	1840.5	24	KNW-9	1101.69	14	-	-	-	KNW-45	1264.46	7.84353	-	-	-	-	-	-	-	-	-	-	-	-	-	-	-	-	-	-
		KNW-71	7801.58	44	KNW-68	1843.93	24	KNW-67	1105.19	14	-	-	-	KNW-7	1277.79	7.85656	-	-	-	-	-	-	-	-	-	-	-	-	-	-	-	-	-	-
		KNW-41	7806.34	44	KNW-26	1850.77	24	KNW-44	1110.08	14	-	-	-	KNW-17	1278.53	7.87053	-	-	-	-	-	-	-	-	-	-	-	-	-	-	-	-	-	-
		KNW-5	7830.81	44	KNW-79	1863.77	24	KNW-71	1110.08	14	-	-	-	KNW-50	2795.44	7.88478	-	-	-	-	-	-	-	-	-	-	-	-	-	-	-	-	-	-
		KNW-51	7867.52	44	KNW-33	1885.66	24	KNW-41	1114.28	14	-	-	-	KNW-15	2833.94	7.89965	-	-	-	-	-	-	-	-	-	-	-	-	-	-	-	-	-	-
		KNW-63	7986.48	44	KNW-27	1891.14	24	KNW-62	1126.16	14	-	-	-	KNW-49	2840.6	7.91499	-	-	-	-	-	-	-	-	-	-	-	-	-	-	-	-	-	-
		KNW-2	8051.05	44	KNW-5	1965.03	24	KNW-11	1128.26	14	-	-	-	KNW-80	2948.68	7.93794	-	-	-	-	-	-	-	-	-	-	-	-	-	-	-	-	-	-
		KNW-70	8206.72	44	KNW-10	1973.92	24	KNW-68	1129.66	14	-	-	-	KNW-51	2949.43	7.96159	-	-	-	-	-	-	-	-	-	-	-	-	-	-	-	-	-	-
		KNW-53	8325.68	44	KNW-29	1976.66	24	KNW-64	1144.34	14	-	-	-	KNW-56	2999.77	7.98527	-	-	-	-	-	-	-	-	-	-	-	-	-	-	-	-	-	-
		KNW-1	8369.18	44	KNW-49	2205.18	24	KNW-70	1196.76	14	-	-	-	KNW-59	3052.33	8.00965	-	-	-	-	-	-	-	-	-	-	-	-	-	-	-	-	-	-
