# Supplementary material for: The KNW rutile—a natural reference material for microbeam U–Pb age and trace element determination
Source: Royal Society of Chemistry journal article supplement (doi:10.1039/d4ja00190g), 2024-01-01
Supplement: d4ja00190g4.pdf [file d4ja00190g4.pdf]

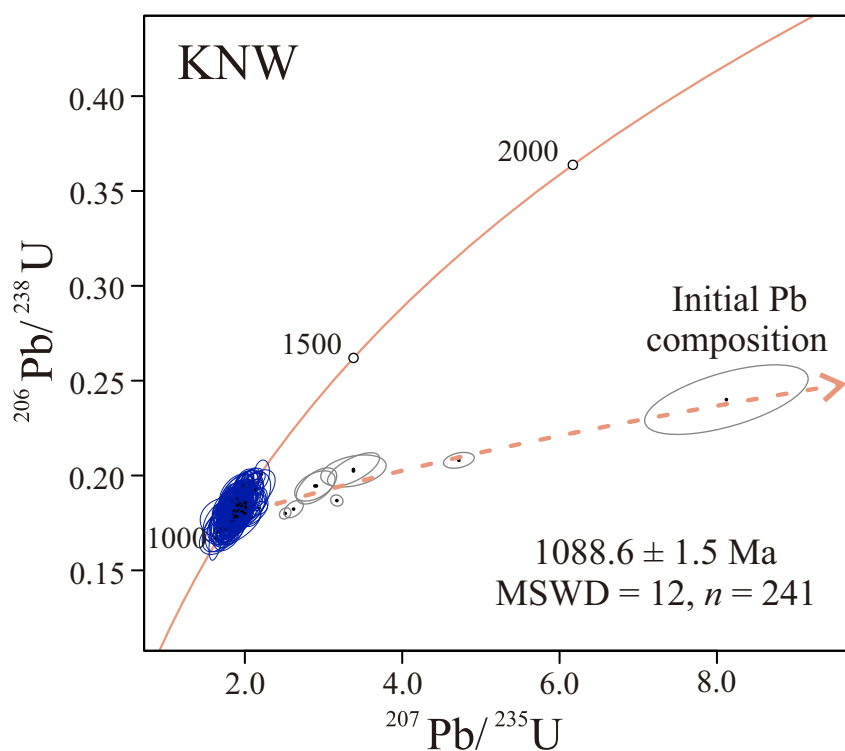

**ESI Figure S2.** Concordia diagram of U–Pb ages obtained using LA–ICP–MS. KNW rutile contains very low common Pb with only 12 of 241 spot analyses show amount of common Pb ( $f_{206}$ : 0–20%)
