# Supplementary figures and images for: The KNW rutile—a natural reference material for microbeam U–Pb age and trace element determination
Source: Royal Society of Chemistry journal article supplement (doi:10.1039/d4ja00190g), 2024-01-01

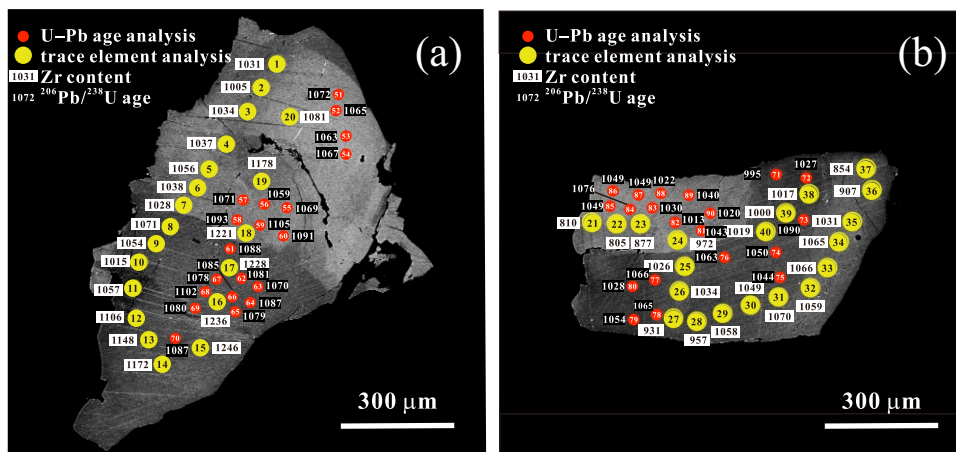

ESI Figure S1. Spot line profile analyses U-Pb age and Zr contents in BSE images

Supplement: d4ja00190g3.pdf [file d4ja00190g3.pdf]
